# Supplementary material for: Maternal Obesity Programs the Premature Aging of Rat Offspring Liver Mitochondrial Electron Transport Chain Genes in a Sex-Dependent Manner
Source: MDPI journal article supplement (doi:10.3390/biology12091166), 2023-08-24
Supplement: s1 [file s1]

## Supplementary Material

**Table S1.** Male DEG in common from the comparisons MO-110PND vs C-110PND and C-650PND vs C-110PND in males. Log2Fold change regulation and their statistical significance are shown by P-value.

|              |         | MO110 vs C110   |                  |           | 650 vs c110     |                  |           |
|--------------|---------|-----------------|------------------|-----------|-----------------|------------------|-----------|
| Gene ID      | Gene    | Fold Regulation | P-value (t-test) | Direction | Fold Regulation | P-value (t-test) | Direction |
| NM_001106795 | Aaas    | 1.36            | 4.64E-02         | DOWN      | 1.50            | 5.06E-03         | DOWN      |
| NM_020538    | Aadac   | 1.43            | 4.24E-03         | DOWN      | 3.11            | 1.19E-02         | DOWN      |
| NM_001106920 | Aamp    | 1.32            | 4.53E-02         | DOWN      | 1.63            | 3.01E-02         | DOWN      |
| NM_001106891 | Aars2   | 1.29            | 3.73E-02         | DOWN      | 1.37            | 4.29E-02         | DOWN      |
| NM_031003    | Abat    | 1.73            | 9.82E-04         | DOWN      | 2.73            | 2.41E-02         | DOWN      |
| NM_012690    | Abcb4   | 1.74            | 2.86E-02         | DOWN      | 2.88            | 1.47E-02         | DOWN      |
| NM_001108201 | Abcc10  | 1.50            | 3.45E-03         | DOWN      | 1.71            | 1.51E-02         | DOWN      |
| NM_031013    | Abcc6   | 1.60            | 1.48E-03         | DOWN      | 2.93            | 3.12E-02         | DOWN      |
| NM_001013100 | Abcd4   | 1.38            | 1.56E-02         | DOWN      | 1.53            | 7.03E-03         | DOWN      |
| NM_001009670 | Abhd14a | 1.39            | 2.47E-02         | DOWN      | 1.69            | 2.26E-02         | DOWN      |
| NM_001007664 | Abhd14b | 1.36            | 4.54E-02         | DOWN      | 2.44            | 2.60E-02         | DOWN      |
| NM_016986    | Acadm   | 1.32            | 2.30E-02         | DOWN      | 1.91            | 4.39E-03         | DOWN      |
| NM_001267534 | Accs    | 1.41            | 1.53E-02         | DOWN      | 1.74            | 2.72E-02         | DOWN      |
| NM_001106111 | Acot13  | 1.54            | 2.60E-02         | DOWN      | 1.60            | 2.46E-02         | DOWN      |
| NM_001079709 | Acot5   | 1.39            | 1.56E-02         | UP        | 2.81            | 5.05E-03         | DOWN      |
| NM_016988    | Acp2    | 1.47            | 1.04E-02         | DOWN      | 2.66            | 9.39E-03         | DOWN      |
| NM_001031645 | Acp6    | 1.33            | 2.50E-02         | DOWN      | 1.85            | 9.09E-03         | DOWN      |
| NM_031144    | Actb    | 1.54            | 1.71E-02         | DOWN      | 1.59            | 4.24E-02         | DOWN      |
| NM_001009602 | Actr10  | 1.27            | 3.38E-02         | DOWN      | 1.53            | 2.66E-02         | DOWN      |
| NM_139090    | Acvr1c  | 1.22            | 3.49E-02         | DOWN      | 1.37            | 8.08E-03         | DOWN      |
| NM_001009603 | Acy3    | 1.75            | 1.38E-02         | DOWN      | 2.24            | 3.91E-02         | DOWN      |
| NM_001047101 | Adamts7 | 2.42            | 1.42E-03         | DOWN      | 4.01            | 3.12E-04         | DOWN      |
| NM_001108985 | Adck1   | 1.39            | 1.95E-02         | DOWN      | 1.44            | 7.43E-03         | DOWN      |
| NM_001107855 | Adck2   | 1.37            | 2.03E-02         | DOWN      | 1.48            | 2.88E-02         | DOWN      |
| NM_001126120 | Adh5    | 1.26            | 3.15E-02         | DOWN      | 1.92            | 1.08E-02         | DOWN      |
| NM_199097    | Adi1    | 1.32            | 4.63E-02         | DOWN      | 2.14            | 1.74E-02         | DOWN      |
| NM_001014144 | Adtrp   | 1.47            | 4.56E-02         | DOWN      | 4.24            | 3.36E-03         | DOWN      |
| NM_001111366 | Afmid   | 1.48            | 1.41E-02         | UP        | 2.72            | 2.35E-02         | DOWN      |
| NM_001048185 | Agmat   | 1.61            | 7.55E-03         | DOWN      | 2.63            | 4.76E-02         | DOWN      |
| NM_001107821 | Agpat2  | 1.38            | 3.44E-02         | DOWN      | 2.43            | 5.47E-03         | DOWN      |

|              |           |      |          |      |      |          |      |
|--------------|-----------|------|----------|------|------|----------|------|
| NM_030985    | Agtr1a    | 1.32 | 3.91E-02 | DOWN | 2.25 | 4.45E-02 | DOWN |
| NM_001276706 | Agxt      | 2.40 | 2.40E-03 | DOWN | 2.98 | 2.14E-03 | DOWN |
| NM_001271270 | Ahctf1    | 1.59 | 4.43E-03 | UP   | 1.74 | 1.90E-02 | DOWN |
| NM_013149    | Ahr       | 2.28 | 1.65E-02 | DOWN | 2.58 | 1.02E-02 | DOWN |
| NM_031356    | Aifm1     | 1.29 | 1.47E-02 | DOWN | 1.99 | 5.81E-03 | DOWN |
| NM_001108497 | Akip1     | 1.33 | 2.25E-02 | DOWN | 1.40 | 2.00E-02 | DOWN |
| NM_031000    | Akr1a1    | 1.33 | 3.32E-02 | DOWN | 1.59 | 1.73E-02 | DOWN |
| NM_001135744 | Akr1c12l1 | 1.53 | 9.78E-03 | DOWN | 2.19 | 5.59E-04 | DOWN |
| NM_001014240 | Akr1c13   | 1.61 | 5.82E-03 | DOWN | 3.09 | 2.51E-02 | DOWN |
| NM_001013057 | Akr1c2    | 2.13 | 1.97E-03 | DOWN | 2.50 | 4.41E-02 | DOWN |
| NM_138510    | Akr1c3    | 1.86 | 3.69E-03 | DOWN | 2.58 | 2.17E-02 | DOWN |
| NM_134407    | Akr7a2    | 1.35 | 3.51E-02 | DOWN | 2.46 | 3.75E-03 | DOWN |
| NM_012899    | Alad      | 1.79 | 5.32E-03 | DOWN | 2.33 | 2.93E-02 | DOWN |
| NM_001033706 | Aldh16a1  | 1.38 | 4.57E-02 | DOWN | 1.76 | 2.38E-02 | DOWN |
| NM_022547    | Aldh1l1   | 1.46 | 1.41E-02 | DOWN | 1.99 | 2.69E-02 | DOWN |
| NM_032416    | Aldh2     | 1.51 | 1.66E-02 | DOWN | 2.15 | 1.13E-02 | DOWN |
| NM_022851    | Aldh5a1   | 1.77 | 1.05E-04 | DOWN | 1.85 | 1.04E-02 | DOWN |
| NM_031057    | Aldh6a1   | 1.28 | 1.70E-02 | DOWN | 2.16 | 2.88E-02 | DOWN |
| NM_022273    | Aldh9a1   | 1.47 | 7.47E-04 | DOWN | 2.29 | 3.32E-02 | DOWN |
| NM_001013951 | Alg13     | 1.32 | 1.21E-02 | DOWN | 1.97 | 4.23E-03 | DOWN |
| NM_001014176 | Alg14     | 1.51 | 2.66E-02 | DOWN | 2.07 | 1.09E-02 | DOWN |
| NM_001033709 | Alg6      | 1.42 | 9.55E-04 | DOWN | 1.80 | 5.96E-04 | DOWN |
| NM_001126273 | Alkbh2    | 1.72 | 5.79E-03 | DOWN | 1.66 | 2.28E-02 | DOWN |
| NM_001106604 | Alms1     | 1.29 | 4.87E-02 | DOWN | 1.65 | 2.10E-03 | DOWN |
| NM_001014101 | Als2cr12  | 1.34 | 1.32E-02 | DOWN | 1.65 | 7.56E-03 | DOWN |
| NM_001134341 | Ambra1    | 1.38 | 2.01E-02 | DOWN | 1.45 | 3.25E-02 | DOWN |
| NM_031011    | Amd1      | 1.58 | 9.49E-03 | DOWN | 1.55 | 4.67E-02 | DOWN |
| NM_001191781 | Amdhd1    | 1.96 | 2.96E-02 | DOWN | 2.75 | 4.72E-02 | DOWN |
| NM_001101681 | Ampd2     | 1.45 | 8.42E-03 | DOWN | 1.96 | 3.05E-02 | DOWN |
| NM_001014004 | Amt       | 1.40 | 4.88E-03 | DOWN | 2.06 | 3.58E-02 | DOWN |
| NM_001173983 | Anapc13   | 1.38 | 2.14E-02 | DOWN | 1.74 | 1.52E-02 | DOWN |
| NM_001108717 | Angel1    | 1.45 | 2.64E-03 | DOWN | 1.50 | 3.49E-02 | DOWN |
| NM_001033698 | Ankrd16   | 1.37 | 1.74E-02 | DOWN | 1.59 | 1.18E-02 | DOWN |
| NM_001013948 | Ankrd46   | 1.65 | 3.59E-03 | DOWN | 1.71 | 3.20E-02 | DOWN |
| NM_001025285 | Ankrd54   | 1.55 | 2.82E-03 | DOWN | 1.54 | 1.19E-02 | DOWN |
| NM_001134969 | Ankrd6    | 1.13 | 2.10E-02 | DOWN | 1.19 | 3.26E-02 | UP   |
| NM_001127650 | Anks4b    | 1.40 | 3.07E-02 | DOWN | 2.84 | 3.08E-02 | DOWN |
| NM_012903    | Anp32a    | 1.59 | 7.62E-04 | DOWN | 1.70 | 1.32E-02 | DOWN |
| NM_001044239 | Ap1m1     | 1.23 | 4.07E-02 | DOWN | 1.56 | 2.31E-02 | DOWN |
| NM_031008    | Ap2a2     | 1.31 | 3.10E-02 | DOWN | 1.41 | 3.02E-02 | DOWN |
| NM_133593    | Ap3m1     | 1.32 | 4.66E-02 | DOWN | 1.48 | 3.69E-02 | DOWN |

|              |          |      |          |      |      |          |      |
|--------------|----------|------|----------|------|------|----------|------|
| NM_001115039 | Ap3s2    | 1.48 | 9.05E-03 | DOWN | 1.59 | 1.15E-02 | DOWN |
| NM_031781    | Apba3    | 1.35 | 3.10E-02 | DOWN | 1.58 | 1.60E-02 | DOWN |
| NM_001106492 | Apip     | 1.31 | 2.86E-02 | DOWN | 1.42 | 1.35E-02 | DOWN |
| NM_001173382 | Ap1f     | 1.52 | 2.31E-02 | DOWN | 1.57 | 2.00E-02 | DOWN |
| NM_001034003 | Apmap    | 1.43 | 1.69E-02 | DOWN | 2.41 | 7.26E-03 | DOWN |
| NM_001106440 | Apoa1bp  | 1.34 | 3.26E-02 | DOWN | 1.69 | 8.69E-03 | DOWN |
| NM_012824    | Apoc1    | 1.45 | 1.42E-02 | DOWN | 3.61 | 8.07E-03 | DOWN |
| NM_001014105 | Apool    | 1.41 | 5.62E-03 | DOWN | 1.57 | 6.64E-03 | DOWN |
| NM_148889    | Aptx     | 1.35 | 4.54E-02 | DOWN | 1.55 | 3.36E-02 | DOWN |
| NM_173105    | Aqp11    | 1.26 | 4.94E-02 | DOWN | 2.12 | 1.86E-02 | DOWN |
| NM_022532    | Araf     | 1.28 | 1.06E-02 | DOWN | 1.71 | 2.32E-02 | DOWN |
| NM_024150    | Arf2     | 1.31 | 9.54E-03 | DOWN | 1.65 | 3.82E-03 | DOWN |
| NM_024151    | Arf4     | 1.26 | 4.68E-02 | DOWN | 1.77 | 2.67E-02 | DOWN |
| NM_024149    | Arf5     | 1.45 | 6.61E-03 | DOWN | 1.73 | 1.60E-02 | DOWN |
| NM_145090    | Arfgap1  | 1.39 | 8.79E-03 | DOWN | 1.38 | 3.75E-02 | DOWN |
| NM_001033707 | Arfgap2  | 1.52 | 2.98E-03 | DOWN | 1.42 | 4.11E-02 | DOWN |
| NM_001107357 | Arhgap12 | 1.50 | 1.73E-02 | DOWN | 1.52 | 3.08E-02 | DOWN |
| NM_001012032 | Arhgap24 | 1.67 | 1.15E-02 | DOWN | 2.08 | 4.37E-03 | DOWN |
| NM_001271132 | Arhgap35 | 1.29 | 4.12E-02 | DOWN | 1.81 | 1.40E-02 | DOWN |
| NM_021694    | Arhgef1  | 1.33 | 1.55E-02 | DOWN | 1.53 | 3.48E-02 | DOWN |
| NM_023982    | Arhgef11 | 1.33 | 3.16E-02 | DOWN | 1.66 | 8.40E-03 | DOWN |
| NM_001107115 | Arhgef18 | 1.32 | 3.78E-02 | DOWN | 1.78 | 9.17E-03 | DOWN |
| NM_001108692 | Arhgef19 | 2.43 | 2.02E-05 | DOWN | 2.31 | 4.70E-02 | DOWN |
| NM_022700    | Arl3     | 1.39 | 2.19E-02 | DOWN | 1.74 | 9.53E-03 | DOWN |
| NM_001106919 | Arpc2    | 1.30 | 4.15E-02 | DOWN | 1.78 | 6.81E-03 | DOWN |
| NM_001106615 | Arpc4    | 1.38 | 1.22E-02 | DOWN | 1.66 | 5.92E-03 | DOWN |
| NM_001025717 | Arpc5    | 1.22 | 4.97E-02 | DOWN | 1.75 | 2.99E-02 | DOWN |
| NM_001107530 | Arpin    | 1.43 | 1.49E-02 | DOWN | 1.50 | 2.83E-02 | DOWN |
| NM_001034933 | Arsa     | 1.74 | 1.35E-03 | DOWN | 1.76 | 1.50E-02 | DOWN |
| NM_001108864 | Asb3     | 1.39 | 8.97E-03 | DOWN | 1.49 | 1.35E-02 | DOWN |
| NM_001009643 | Aspdh    | 1.42 | 5.55E-03 | DOWN | 2.82 | 2.36E-02 | DOWN |
| NM_001040156 | Aste1    | 1.21 | 1.50E-02 | DOWN | 1.34 | 1.40E-03 | DOWN |
| NM_172336    | Atf5     | 1.96 | 8.18E-03 | DOWN | 3.09 | 1.09E-03 | DOWN |
| NM_001002809 | Atf6b    | 1.42 | 2.03E-02 | DOWN | 1.51 | 2.95E-02 | DOWN |
| NM_134394    | Atg3     | 1.36 | 1.31E-02 | DOWN | 1.85 | 2.68E-03 | DOWN |
| NM_001126298 | Atg4a1   | 1.35 | 7.08E-03 | DOWN | 1.86 | 1.77E-03 | DOWN |
| NM_053359    | Atox1    | 1.52 | 2.97E-02 | DOWN | 2.50 | 1.33E-02 | DOWN |
| NM_001107324 | Atp11a   | 1.56 | 3.62E-03 | DOWN | 1.61 | 5.76E-03 | DOWN |
| NM_001109369 | Atp13a3  | 1.23 | 4.74E-02 | DOWN | 1.25 | 2.71E-02 | DOWN |
| NM_053825    | Atp5c1   | 1.33 | 7.33E-03 | DOWN | 1.56 | 2.37E-02 | DOWN |
| NM_080481    | Atp5i    | 1.46 | 2.73E-02 | DOWN | 1.68 | 2.15E-02 | DOWN |

|              |          |      |          |      |      |          |      |
|--------------|----------|------|----------|------|------|----------|------|
| NM_138883    | Atp5o    | 1.34 | 3.65E-02 | DOWN | 1.67 | 1.89E-02 | DOWN |
| NM_001007749 | Atp5s    | 1.34 | 8.02E-03 | DOWN | 1.76 | 1.34E-02 | DOWN |
| NM_053884    | Atp6v1f  | 1.30 | 4.82E-02 | DOWN | 1.58 | 2.08E-02 | DOWN |
| NM_001106130 | Atp9b    | 1.40 | 4.60E-03 | DOWN | 1.47 | 1.70E-02 | DOWN |
| NM_001107959 | Atpaf1   | 1.39 | 1.44E-03 | DOWN | 1.44 | 1.20E-02 | DOWN |
| NM_001127526 | Atraid   | 1.43 | 3.07E-03 | DOWN | 1.90 | 2.27E-02 | DOWN |
| NM_001136261 | Atxn7l3b | 1.22 | 3.99E-02 | DOWN | 1.87 | 1.87E-02 | DOWN |
| NM_001079899 | Aup1     | 1.32 | 4.77E-02 | DOWN | 1.99 | 4.96E-03 | DOWN |
| NM_001004237 | Aurkaip1 | 1.33 | 3.55E-02 | DOWN | 1.68 | 1.53E-02 | DOWN |
| NM_024355    | Axin2    | 1.72 | 1.30E-02 | DOWN | 1.83 | 1.43E-02 | DOWN |
| NM_001128184 | B3gat3   | 1.35 | 3.53E-02 | DOWN | 1.63 | 2.55E-02 | DOWN |
| NM_001106324 | B3gnt1   | 1.24 | 1.42E-02 | DOWN | 1.59 | 9.98E-03 | DOWN |
| NM_022860    | B4galnt1 | 1.99 | 2.34E-02 | DOWN | 2.32 | 4.25E-02 | DOWN |
| NM_022698    | Bad      | 1.44 | 1.21E-02 | DOWN | 1.78 | 2.05E-02 | DOWN |
| NM_139082    | Bambi    | 1.70 | 4.41E-03 | DOWN | 1.48 | 4.86E-02 | DOWN |
| NM_001107158 | Baz2a    | 1.38 | 3.83E-02 | DOWN | 1.60 | 1.07E-02 | DOWN |
| NM_022629    | Bbox1    | 1.34 | 1.89E-02 | DOWN | 2.69 | 2.20E-02 | DOWN |
| NM_001109286 | Bbs10    | 1.83 | 9.12E-03 | DOWN | 1.93 | 1.93E-02 | DOWN |
| NM_001106826 | Bbs4     | 1.53 | 3.19E-02 | DOWN | 1.70 | 1.09E-02 | DOWN |
| NM_001006980 | Bcap29   | 1.33 | 6.09E-03 | DOWN | 1.66 | 4.22E-03 | DOWN |
| NM_001107722 | Bcar3    | 1.86 | 2.49E-02 | DOWN | 1.72 | 3.47E-02 | DOWN |
| NM_001106458 | Bcas2    | 1.34 | 6.37E-03 | DOWN | 1.79 | 3.01E-03 | DOWN |
| NM_012782    | Bckdha   | 1.40 | 1.04E-03 | DOWN | 1.52 | 4.80E-02 | DOWN |
| NM_019267    | Bckdhb   | 1.42 | 1.31E-02 | DOWN | 1.94 | 4.12E-03 | DOWN |
| NM_001127712 | Bco2     | 1.52 | 2.31E-03 | DOWN | 3.15 | 1.56E-02 | DOWN |
| NM_053995    | Bdh1     | 1.60 | 4.95E-03 | DOWN | 3.11 | 1.32E-02 | DOWN |
| NM_019251    | Bet1     | 1.34 | 6.05E-03 | DOWN | 1.86 | 1.47E-02 | DOWN |
| NM_207611    | Bhlhb9   | 1.43 | 2.44E-02 | DOWN | 1.75 | 1.72E-02 | DOWN |
| NM_030850    | Bhmt     | 2.90 | 5.50E-04 | DOWN | 3.31 | 3.94E-02 | DOWN |
| NM_022684    | Bid      | 1.43 | 3.49E-02 | DOWN | 1.60 | 1.63E-02 | DOWN |
| NM_001012223 | Bin2     | 1.72 | 2.39E-02 | DOWN | 1.78 | 3.41E-02 | DOWN |
| NM_001107347 | Bloc1s5  | 1.48 | 1.26E-03 | DOWN | 1.58 | 8.58E-03 | DOWN |
| NM_053850    | Blvra    | 1.50 | 1.07E-02 | DOWN | 1.71 | 2.46E-02 | DOWN |
| NM_139258    | Bmf      | 1.95 | 7.02E-05 | DOWN | 2.69 | 5.53E-03 | DOWN |
| NM_031323    | Bmp1     | 1.77 | 1.39E-04 | DOWN | 2.12 | 6.23E-03 | DOWN |
| NM_001037206 | Bphl     | 1.40 | 7.45E-03 | DOWN | 2.69 | 6.35E-03 | DOWN |
| NM_001108440 | Brd7     | 1.31 | 1.56E-02 | DOWN | 1.46 | 2.52E-02 | DOWN |
| NM_199270    | Bre      | 1.34 | 3.36E-02 | DOWN | 1.63 | 2.45E-02 | DOWN |
| NM_001012171 | Bscl2    | 1.46 | 1.27E-02 | DOWN | 1.92 | 8.63E-03 | DOWN |
| NM_022261    | Bspry    | 1.54 | 1.70E-02 | DOWN | 1.39 | 2.49E-02 | DOWN |
| NM_001077683 | Btbd6    | 1.36 | 1.88E-02 | DOWN | 1.51 | 2.23E-02 | DOWN |

|              |         |      |          |      |      |          |      |
|--------------|---------|------|----------|------|------|----------|------|
| NM_001047906 | Bub3    | 1.35 | 1.35E-02 | DOWN | 1.66 | 1.03E-02 | DOWN |
| NM_199391    | C2cd2   | 1.53 | 8.58E-05 | DOWN | 1.82 | 1.94E-03 | DOWN |
| NM_001108926 | Cabp4   | 1.56 | 5.34E-03 | DOWN | 1.58 | 1.30E-02 | DOWN |
| NM_001143893 | Cabyr   | 1.28 | 4.62E-02 | DOWN | 1.38 | 7.63E-03 | DOWN |
| NM_017298    | Cacna1d | 1.77 | 5.48E-03 | DOWN | 1.99 | 2.98E-02 | DOWN |
| NM_017326    | Calm2   | 1.44 | 8.20E-03 | DOWN | 1.42 | 4.49E-02 | DOWN |
| NM_001105801 | Camta2  | 1.33 | 1.82E-02 | DOWN | 1.49 | 2.77E-02 | DOWN |
| NM_031673    | Capn10  | 1.48 | 1.45E-03 | DOWN | 1.50 | 2.65E-02 | DOWN |
| NM_001030037 | Capn7   | 1.27 | 3.73E-02 | DOWN | 1.55 | 1.55E-02 | DOWN |
| NM_017118    | Capns1  | 1.35 | 2.77E-02 | DOWN | 1.59 | 1.25E-02 | DOWN |
| NM_001108990 | Caps2   | 1.39 | 2.78E-02 | DOWN | 1.61 | 1.22E-02 | DOWN |
| NM_001009180 | Capza2  | 1.22 | 3.73E-02 | DOWN | 1.58 | 2.36E-02 | DOWN |
| NM_001106165 | Car7    | 1.48 | 2.40E-02 | DOWN | 1.52 | 2.78E-02 | DOWN |
| NM_001177684 | Cars2   | 1.42 | 6.44E-03 | DOWN | 1.74 | 6.83E-03 | DOWN |
| NM_012922    | Casp3   | 1.42 | 2.79E-02 | DOWN | 2.29 | 2.52E-02 | DOWN |
| NM_022260    | Casp7   | 1.65 | 6.95E-04 | DOWN | 1.60 | 3.98E-02 | DOWN |
| NM_001033715 | Cast    | 1.27 | 9.31E-03 | DOWN | 1.69 | 1.47E-02 | DOWN |
| NM_012520    | Cat     | 1.57 | 9.61E-04 | DOWN | 2.78 | 2.08E-02 | DOWN |
| NM_182672    | Cbr4    | 1.34 | 1.27E-02 | DOWN | 1.80 | 2.52E-03 | DOWN |
| NM_012522    | Cbs     | 1.58 | 3.01E-03 | DOWN | 2.74 | 3.52E-02 | DOWN |
| NM_001034078 | Cbx8    | 1.35 | 2.54E-02 | DOWN | 1.72 | 1.72E-02 | DOWN |
| NM_001013869 | Cc2d1a  | 1.46 | 1.04E-03 | DOWN | 1.71 | 2.04E-03 | DOWN |
| NM_001024866 | Ccdc104 | 1.24 | 3.38E-02 | DOWN | 1.96 | 1.06E-03 | DOWN |
| NM_001014067 | Ccdc17  | 1.48 | 1.19E-02 | DOWN | 2.16 | 2.21E-03 | DOWN |
| NM_001134688 | Ccdc40  | 1.07 | 3.66E-02 | UP   | 1.13 | 4.52E-02 | UP   |
| NM_001014098 | Ccdc51  | 1.41 | 2.30E-02 | DOWN | 1.37 | 4.88E-02 | DOWN |
| NM_001105875 | Ccdc58  | 1.33 | 3.17E-02 | DOWN | 2.25 | 1.14E-03 | DOWN |
| NM_001108660 | Ccl27   | 1.46 | 1.60E-02 | DOWN | 1.50 | 2.43E-02 | DOWN |
| NM_001037794 | Cct8l1  | 1.12 | 1.28E-02 | DOWN | 1.14 | 1.94E-03 | DOWN |
| NM_031812    | Cd164   | 1.59 | 4.54E-04 | DOWN | 1.91 | 4.48E-02 | DOWN |
| NM_001013237 | Cd19    | 1.46 | 6.54E-03 | DOWN | 1.68 | 4.65E-04 | DOWN |
| NM_170789    | Cd247   | 1.74 | 4.16E-02 | DOWN | 1.77 | 1.22E-02 | DOWN |
| NM_013169    | Cd3d    | 1.23 | 1.82E-02 | DOWN | 1.22 | 1.83E-02 | DOWN |
| NM_012925    | Cd59    | 1.45 | 6.15E-03 | DOWN | 1.64 | 1.47E-02 | DOWN |
| NM_175577    | Cd6     | 1.35 | 3.63E-02 | DOWN | 1.37 | 1.65E-02 | DOWN |
| NM_053877    | Cdc123  | 1.27 | 3.73E-02 | DOWN | 1.80 | 4.85E-03 | DOWN |
| NM_001024744 | Cdc16   | 1.25 | 1.55E-02 | DOWN | 1.52 | 1.93E-02 | DOWN |
| NM_001100659 | Cdc23   | 1.36 | 2.58E-02 | DOWN | 1.48 | 1.46E-02 | DOWN |
| NM_001013240 | Cdc26   | 1.31 | 6.06E-03 | DOWN | 1.89 | 1.83E-02 | DOWN |
| NM_138899    | Cdipt   | 1.36 | 1.75E-02 | DOWN | 1.76 | 6.94E-03 | DOWN |
| NM_001109937 | Cdk10   | 2.09 | 2.58E-02 | DOWN | 1.62 | 3.71E-02 | DOWN |

|              |         |      |          |      |      |          |      |
|--------------|---------|------|----------|------|------|----------|------|
| NM_001025752 | Cdk20   | 1.24 | 4.21E-02 | DOWN | 1.50 | 2.66E-02 | DOWN |
| NM_001113751 | Cdk2ap1 | 1.32 | 2.63E-02 | DOWN | 1.62 | 3.13E-02 | DOWN |
| NM_001109498 | Cdk2ap2 | 1.70 | 1.32E-02 | DOWN | 1.86 | 4.62E-02 | DOWN |
| NM_053593    | Cdk4    | 1.41 | 1.90E-02 | DOWN | 1.43 | 4.60E-02 | DOWN |
| NM_080885    | Cdk5    | 1.23 | 2.94E-02 | DOWN | 1.42 | 3.11E-02 | DOWN |
| NM_001033862 | Ceacam1 | 1.92 | 5.09E-03 | DOWN | 2.70 | 1.35E-02 | DOWN |
| NM_001004098 | Cenpc   | 1.41 | 9.28E-03 | DOWN | 1.56 | 3.44E-02 | DOWN |
| NM_001107265 | Cenpj   | 1.33 | 4.85E-02 | DOWN | 1.73 | 2.49E-02 | DOWN |
| NM_001244761 | Cenpl   | 1.98 | 2.59E-03 | DOWN | 1.61 | 9.93E-03 | DOWN |
| NM_001108124 | Cep57   | 1.30 | 2.34E-02 | DOWN | 1.43 | 3.15E-02 | DOWN |
| NM_001013862 | Cep95   | 1.44 | 1.84E-03 | DOWN | 1.54 | 1.57E-02 | DOWN |
| NM_001033700 | Cers2   | 1.39 | 3.26E-02 | DOWN | 2.62 | 1.27E-02 | DOWN |
| NM_199378    | Cfdp1   | 1.45 | 8.19E-03 | DOWN | 1.56 | 6.28E-03 | DOWN |
| NM_001108369 | Chchd1  | 1.41 | 4.64E-02 | DOWN | 1.62 | 3.37E-02 | DOWN |
| NM_001107797 | Chd6    | 1.26 | 2.78E-02 | DOWN | 1.38 | 3.95E-02 | DOWN |
| NM_001108906 | Chmp2a  | 1.38 | 4.72E-02 | DOWN | 1.59 | 2.50E-02 | DOWN |
| NM_001025410 | Chmp5   | 1.32 | 2.46E-02 | DOWN | 1.80 | 1.14E-02 | DOWN |
| NM_001108872 | Chmp7   | 1.35 | 1.07E-02 | DOWN | 1.60 | 2.07E-02 | DOWN |
| NM_001106574 | Chpf2   | 1.40 | 2.85E-02 | DOWN | 1.76 | 1.44E-02 | DOWN |
| NM_057134    | Chrd    | 1.64 | 3.05E-03 | DOWN | 1.84 | 3.95E-02 | DOWN |
| NM_001108869 | Cideb   | 1.28 | 1.43E-02 | DOWN | 2.77 | 2.99E-02 | DOWN |
| NM_001270803 | Ciita   | 1.88 | 1.25E-02 | DOWN | 1.83 | 2.06E-02 | DOWN |
| NM_001105835 | Cisd3   | 1.51 | 2.55E-02 | DOWN | 1.86 | 4.39E-03 | DOWN |
| NM_031699    | Cldn1   | 1.46 | 4.88E-02 | DOWN | 3.56 | 7.84E-04 | DOWN |
| NM_001014254 | Clk2    | 1.33 | 1.29E-02 | DOWN | 1.61 | 1.32E-02 | DOWN |
| NM_019299    | Cltc    | 1.32 | 3.81E-02 | DOWN | 1.58 | 3.36E-02 | DOWN |
| NM_001014225 | Cluap1  | 1.27 | 7.53E-03 | DOWN | 1.39 | 4.40E-02 | DOWN |
| NM_001108969 | Clvs1   | 1.20 | 6.06E-03 | DOWN | 1.55 | 1.14E-02 | DOWN |
| NM_198754    | Cmtm8   | 1.49 | 1.81E-03 | DOWN | 2.10 | 3.53E-02 | DOWN |
| NM_022598    | Cnbp    | 1.24 | 4.88E-02 | DOWN | 1.59 | 2.01E-02 | DOWN |
| NM_001106173 | Cnep1r1 | 1.47 | 2.67E-03 | DOWN | 1.39 | 1.09E-02 | DOWN |
| NM_001106029 | Cnih1   | 1.29 | 2.44E-02 | DOWN | 1.89 | 1.69E-03 | DOWN |
| NM_001105981 | Cnih4   | 1.29 | 2.91E-02 | DOWN | 1.54 | 7.37E-03 | DOWN |
| NM_001106901 | Cnnm3   | 1.48 | 1.01E-02 | DOWN | 1.64 | 2.31E-02 | DOWN |
| NM_001007003 | Cnot10  | 1.34 | 2.91E-02 | DOWN | 1.57 | 6.66E-03 | DOWN |
| NM_001077585 | Cnpy2   | 1.37 | 1.46E-02 | DOWN | 1.85 | 2.07E-02 | DOWN |
| NM_001006954 | Coasy   | 1.38 | 1.59E-02 | DOWN | 1.86 | 2.39E-02 | DOWN |
| NM_001108449 | Cog4    | 1.25 | 4.70E-02 | DOWN | 1.78 | 2.48E-03 | DOWN |
| NM_032085    | Col3a1  | 1.31 | 5.02E-03 | DOWN | 1.50 | 2.66E-02 | DOWN |
| NM_001115022 | Commd1  | 1.34 | 1.30E-02 | DOWN | 1.47 | 8.38E-03 | DOWN |
| NM_001004276 | Commd10 | 1.35 | 4.65E-03 | DOWN | 1.57 | 3.67E-02 | DOWN |

|              |          |      |          |      |      |          |      |
|--------------|----------|------|----------|------|------|----------|------|
| NM_001109503 | Commd2   | 1.42 | 2.93E-03 | DOWN | 1.91 | 1.20E-03 | DOWN |
| NM_198732    | Commd3   | 1.36 | 3.08E-02 | DOWN | 1.83 | 5.64E-03 | DOWN |
| NM_001108762 | Commd4   | 1.46 | 1.78E-02 | DOWN | 1.53 | 4.17E-02 | DOWN |
| NM_139108    | Commd5   | 1.53 | 4.25E-02 | DOWN | 1.86 | 2.03E-02 | DOWN |
| NM_001030029 | Commd7   | 1.71 | 8.99E-04 | DOWN | 1.45 | 2.11E-02 | DOWN |
| NM_001106076 | Cope     | 1.26 | 4.24E-02 | DOWN | 1.55 | 1.87E-02 | DOWN |
| NM_001106929 | Copg2    | 1.48 | 1.60E-03 | DOWN | 1.48 | 1.10E-02 | DOWN |
| NM_001025695 | Cops5    | 1.34 | 1.58E-02 | DOWN | 1.68 | 1.27E-02 | DOWN |
| NM_001108807 | Cops7b   | 1.26 | 8.49E-03 | DOWN | 1.48 | 1.90E-02 | DOWN |
| NM_001013227 | Cops8    | 1.33 | 3.15E-02 | DOWN | 1.79 | 4.85E-03 | DOWN |
| NM_001108294 | Copz2    | 1.39 | 1.86E-02 | DOWN | 1.50 | 1.75E-02 | DOWN |
| NM_001031662 | Coq4     | 1.49 | 2.27E-03 | DOWN | 1.40 | 3.63E-02 | DOWN |
| NM_001039022 | Coq5     | 1.61 | 6.70E-03 | DOWN | 1.72 | 8.66E-03 | DOWN |
| NM_001033699 | Cox15    | 1.47 | 1.54E-02 | DOWN | 1.56 | 4.90E-02 | DOWN |
| NM_001163153 | Cox16    | 1.26 | 5.00E-02 | DOWN | 2.16 | 2.65E-03 | DOWN |
| NM_001105976 | Cox20    | 1.36 | 3.24E-02 | DOWN | 1.63 | 6.14E-03 | DOWN |
| NM_053586    | Cox5b    | 1.34 | 4.65E-02 | DOWN | 1.71 | 1.57E-02 | DOWN |
| NM_001106704 | Cox7a2l  | 1.28 | 2.93E-02 | DOWN | 1.47 | 1.98E-02 | DOWN |
| NM_001108454 | Cpne7    | 1.34 | 2.92E-02 | DOWN | 1.54 | 3.77E-02 | DOWN |
| NM_001037095 | Cpox     | 1.36 | 4.28E-02 | DOWN | 1.75 | 1.48E-02 | DOWN |
| NM_031640    | Cpq      | 1.29 | 4.42E-02 | DOWN | 2.50 | 2.00E-02 | DOWN |
| NM_001130571 | Cpsf1    | 1.25 | 4.18E-02 | DOWN | 1.69 | 5.41E-03 | DOWN |
| NM_053670    | Crcp     | 1.46 | 4.18E-02 | DOWN | 1.93 | 1.59E-02 | DOWN |
| NM_022501    | Crip2    | 1.35 | 8.17E-03 | DOWN | 1.70 | 3.39E-02 | DOWN |
| NM_031987    | Crot     | 1.98 | 1.53E-02 | DOWN | 2.84 | 1.93E-02 | DOWN |
| NM_001033895 | Crtc2    | 1.32 | 4.38E-02 | DOWN | 1.53 | 4.28E-02 | DOWN |
| NM_133405    | Cry2     | 1.40 | 2.98E-02 | DOWN | 1.87 | 9.05E-03 | DOWN |
| NM_031021    | Csnk2b   | 1.34 | 1.16E-02 | DOWN | 1.55 | 2.05E-02 | DOWN |
| NM_031023    | Ctbs     | 1.19 | 4.17E-02 | DOWN | 2.20 | 3.59E-02 | DOWN |
| NM_001128079 | Ctdsp1   | 1.37 | 1.81E-02 | DOWN | 1.61 | 2.18E-02 | DOWN |
| NM_001024870 | Ctnnbl1  | 1.33 | 1.35E-02 | DOWN | 1.63 | 1.48E-02 | DOWN |
| NM_012939    | Ctsh     | 1.50 | 7.50E-03 | DOWN | 2.03 | 4.20E-02 | DOWN |
| NM_001079886 | Cuedc2   | 1.38 | 2.20E-02 | DOWN | 1.40 | 4.42E-02 | DOWN |
| NM_001191582 | Cul9     | 1.36 | 4.40E-03 | DOWN | 1.37 | 4.02E-02 | DOWN |
| NM_001108525 | Cutc     | 1.35 | 4.46E-02 | DOWN | 2.01 | 1.84E-03 | DOWN |
| NM_001013199 | Cwc27    | 1.34 | 1.74E-02 | DOWN | 1.49 | 8.71E-03 | DOWN |
| NM_022177    | Cxcl12   | 1.64 | 1.52E-02 | DOWN | 2.03 | 4.05E-02 | DOWN |
| NM_001007753 | Cyb561d2 | 1.45 | 1.39E-02 | DOWN | 1.59 | 4.96E-02 | DOWN |
| NM_030586    | Cyb5b    | 1.25 | 2.25E-02 | DOWN | 1.56 | 4.34E-02 | DOWN |
| NM_138877    | Cyb5r3   | 1.44 | 6.05E-03 | DOWN | 2.09 | 5.49E-03 | DOWN |
| NM_133427    | Cyb5r4   | 1.36 | 3.46E-02 | DOWN | 1.76 | 5.05E-03 | DOWN |

|              |         |      |          |      |      |          |      |
|--------------|---------|------|----------|------|------|----------|------|
| NM_012538    | Cyp11b2 | 1.08 | 4.47E-02 | DOWN | 1.10 | 4.61E-02 | DOWN |
| NM_012693    | Cyp2a2  | 1.83 | 3.51E-04 | DOWN | 3.40 | 1.64E-02 | DOWN |
| NM_173294    | Cyp2b3  | 1.25 | 4.07E-02 | DOWN | 3.24 | 2.59E-02 | DOWN |
| NM_012730    | Cyp2d2  | 1.41 | 1.88E-02 | DOWN | 3.36 | 1.28E-02 | DOWN |
| NM_173093    | Cyp2d3  | 1.37 | 2.59E-02 | DOWN | 3.17 | 1.47E-02 | DOWN |
| NM_138515    | Cyp2d4  | 1.78 | 3.56E-02 | DOWN | 5.55 | 1.85E-04 | DOWN |
| NM_173304    | Cyp2d5  | 1.76 | 1.70E-02 | DOWN | 3.78 | 5.10E-03 | DOWN |
| NM_001024779 | Cyp2u1  | 2.00 | 2.09E-02 | DOWN | 2.92 | 7.92E-04 | DOWN |
| NM_153312    | Cyp3a2  | 1.88 | 2.49E-02 | DOWN | 4.25 | 2.10E-02 | DOWN |
| NM_019623    | Cyp4f1  | 1.36 | 1.68E-02 | DOWN | 3.03 | 2.55E-02 | DOWN |
| NM_153318    | Cyp4f6  | 1.40 | 1.78E-02 | DOWN | 2.17 | 5.58E-03 | DOWN |
| NM_031241    | Cyp8b1  | 3.21 | 5.71E-03 | DOWN | 2.62 | 4.88E-02 | DOWN |
| NM_001106926 | D2hgdh  | 1.43 | 3.82E-03 | DOWN | 1.97 | 1.95E-02 | DOWN |
| NM_138910    | Dad1    | 1.26 | 4.82E-02 | DOWN | 1.69 | 2.61E-02 | DOWN |
| NM_001107120 | Daglb   | 1.36 | 4.25E-03 | DOWN | 1.63 | 6.49E-03 | DOWN |
| NM_001011950 | Dap3    | 1.35 | 1.34E-03 | DOWN | 1.42 | 1.76E-02 | DOWN |
| NM_001013107 | Dazap2  | 1.38 | 9.41E-03 | DOWN | 1.91 | 2.62E-03 | DOWN |
| NM_021596    | Dbil5   | 1.13 | 2.73E-02 | DOWN | 1.29 | 3.55E-04 | DOWN |
| NM_001277212 | Dbnl    | 1.60 | 7.24E-03 | DOWN | 1.84 | 1.38E-02 | DOWN |
| NM_001009686 | Dcaf11  | 1.51 | 7.85E-03 | DOWN | 2.32 | 1.05E-02 | DOWN |
| NM_001107162 | Dcaf15  | 1.36 | 4.51E-02 | DOWN | 1.49 | 3.34E-02 | DOWN |
| NM_001107057 | Dcaf7   | 1.21 | 9.41E-03 | DOWN | 1.33 | 4.42E-02 | DOWN |
| NM_001007724 | Dcakd   | 1.63 | 3.61E-03 | DOWN | 1.61 | 1.42E-02 | DOWN |
| NM_001108659 | Dctn3   | 1.30 | 4.05E-02 | DOWN | 1.58 | 2.27E-02 | DOWN |
| i            | Ddc     | 1.77 | 3.29E-03 | DOWN | 2.31 | 4.92E-02 | DOWN |
| NM_024131    | Ddt     | 1.41 | 3.46E-02 | DOWN | 2.38 | 1.80E-02 | DOWN |
| NM_001015018 | Ddx17   | 1.32 | 3.09E-02 | DOWN | 1.46 | 1.46E-02 | DOWN |
| NM_001108046 | Ddx41   | 1.25 | 4.53E-02 | DOWN | 1.53 | 4.75E-02 | DOWN |
| NM_001191747 | Dennd1a | 1.39 | 2.72E-02 | DOWN | 1.60 | 2.57E-02 | DOWN |
| NM_001126289 | Dennd1c | 1.44 | 1.75E-02 | DOWN | 1.59 | 4.77E-02 | DOWN |
| NM_001029916 | Depdc7  | 1.24 | 1.10E-02 | DOWN | 2.63 | 3.83E-02 | DOWN |
| NM_001014202 | Derl1   | 1.29 | 2.47E-02 | DOWN | 1.77 | 1.56E-02 | DOWN |
| NM_001109577 | Derl3   | 1.43 | 2.70E-02 | UP   | 1.71 | 8.87E-03 | DOWN |
| NM_053362    | Dffb    | 1.46 | 1.42E-02 | DOWN | 1.57 | 2.06E-02 | DOWN |
| NM_001012345 | Dgat2   | 1.67 | 8.54E-03 | DOWN | 2.17 | 2.34E-02 | DOWN |
| NM_001106602 | Dguok   | 1.28 | 3.36E-02 | DOWN | 1.54 | 9.96E-03 | DOWN |
| NM_001007621 | Dhrs1   | 1.40 | 3.41E-02 | DOWN | 1.88 | 4.39E-02 | DOWN |
| NM_001037199 | Dhrs3   | 1.39 | 2.40E-02 | DOWN | 2.26 | 3.57E-02 | DOWN |
| NM_001130039 | Dhx32   | 1.34 | 3.07E-02 | DOWN | 1.44 | 2.74E-02 | DOWN |
| NM_001106185 | Dhx38   | 1.33 | 1.82E-02 | DOWN | 1.58 | 1.62E-02 | DOWN |
| NM_001008380 | Dis3l   | 1.34 | 1.11E-02 | DOWN | 1.48 | 2.86E-02 | DOWN |



|              |         |      |          |      |      |          |      |
|--------------|---------|------|----------|------|------|----------|------|
| NM_199385    | Dld     | 1.36 | 1.28E-03 | DOWN | 1.58 | 5.26E-03 | DOWN |
| NM_032063    | Dll1    | 2.36 | 3.06E-04 | DOWN | 1.62 | 3.61E-02 | DOWN |
| NM_001015006 | Dmap1   | 1.58 | 4.17E-03 | DOWN | 1.51 | 1.60E-02 | DOWN |
| NM_001108385 | Dmtn    | 1.98 | 4.42E-03 | DOWN | 1.71 | 4.67E-02 | DOWN |
| NM_001130510 | Dnajb7  | 1.45 | 6.18E-03 | DOWN | 1.52 | 1.30E-03 | DOWN |
| NM_001034032 | Dnajc12 | 1.91 | 1.05E-02 | DOWN | 2.23 | 4.52E-03 | DOWN |
| NM_001106050 | Dnajc15 | 1.27 | 4.17E-02 | DOWN | 1.63 | 2.68E-02 | DOWN |
| NM_001014204 | Dnajc22 | 1.31 | 3.16E-02 | DOWN | 2.29 | 4.08E-02 | DOWN |
| NM_001191853 | Dnajc24 | 1.24 | 3.61E-02 | DOWN | 1.67 | 1.54E-03 | DOWN |
| NM_022232    | Dnajc3  | 1.26 | 2.59E-02 | DOWN | 2.39 | 3.11E-02 | DOWN |
| NM_001109024 | Dnajc30 | 1.26 | 3.65E-02 | DOWN | 1.78 | 1.04E-02 | DOWN |
| NM_053354    | Dnmt1   | 1.44 | 4.75E-03 | DOWN | 1.41 | 1.98E-02 | DOWN |
| NM_001003959 | Dnmt3b  | 1.47 | 4.46E-02 | DOWN | 1.71 | 2.38E-02 | DOWN |
| NM_001143858 | Dock1   | 1.39 | 1.52E-02 | DOWN | 1.43 | 3.95E-02 | DOWN |
| NM_001107826 | Dolk    | 1.30 | 4.60E-02 | DOWN | 1.80 | 4.90E-03 | DOWN |
| NM_199388    | Dpagt1  | 1.26 | 4.09E-02 | DOWN | 1.49 | 4.09E-02 | DOWN |
| NM_001014181 | Dph6    | 1.34 | 3.11E-03 | DOWN | 1.38 | 1.64E-02 | DOWN |
| NM_019252    | Dpm2    | 1.33 | 1.61E-02 | DOWN | 1.71 | 1.90E-02 | DOWN |
| NM_001109331 | Dpm3    | 1.27 | 4.22E-02 | DOWN | 1.74 | 7.69E-03 | DOWN |
| NM_053748    | Dpp3    | 1.42 | 1.44E-02 | DOWN | 2.31 | 5.08E-03 | DOWN |
| NM_001077668 | Drap1   | 1.34 | 4.24E-02 | DOWN | 1.49 | 3.52E-02 | DOWN |
| NM_001108594 | Dtd1    | 1.43 | 4.75E-03 | DOWN | 1.41 | 3.75E-02 | DOWN |
| NM_001108981 | Dtd2    | 1.45 | 3.32E-03 | DOWN | 1.95 | 8.62E-03 | DOWN |
| NM_001037664 | Dtnbp1  | 1.63 | 7.32E-03 | DOWN | 1.74 | 2.20E-03 | DOWN |
| NM_001013921 | Dtwd1   | 1.42 | 2.84E-03 | DOWN | 1.36 | 2.39E-03 | DOWN |
| NM_053769    | Dusp1   | 1.61 | 1.57E-02 | UP   | 2.62 | 6.33E-03 | DOWN |
| NM_031820    | Dvl1    | 1.31 | 4.34E-02 | DOWN | 1.68 | 1.15E-02 | DOWN |
| NM_001270625 | Dync1i2 | 1.33 | 2.83E-02 | DOWN | 2.24 | 2.64E-03 | DOWN |
| NM_001108100 | Dyrk2   | 1.33 | 2.86E-02 | DOWN | 1.93 | 4.04E-03 | DOWN |
| NM_001134987 | Eapp    | 1.33 | 2.39E-02 | DOWN | 1.92 | 2.62E-03 | DOWN |
| NM_001108381 | Ebpl    | 1.34 | 1.39E-02 | DOWN | 2.05 | 1.87E-02 | DOWN |
| NM_001106675 | Echdc2  | 1.33 | 4.11E-02 | DOWN | 2.49 | 1.28E-02 | DOWN |
| NM_001101010 | Echdc3  | 1.32 | 3.10E-03 | DOWN | 2.48 | 4.99E-02 | DOWN |
| NM_078623    | Echs1   | 1.42 | 3.57E-04 | DOWN | 1.89 | 1.60E-02 | DOWN |
| NM_001006986 | Ecsit   | 1.40 | 6.54E-03 | DOWN | 1.57 | 3.40E-02 | DOWN |
| NM_001106557 | Edf1    | 1.45 | 1.90E-02 | DOWN | 1.62 | 2.16E-02 | DOWN |
| NM_001109249 | Eefsec  | 1.30 | 4.10E-02 | DOWN | 1.48 | 2.96E-02 | DOWN |
| NM_012842    | Egf     | 1.78 | 6.99E-03 | DOWN | 2.39 | 6.10E-03 | DOWN |
| NM_001004083 | Egln2   | 1.31 | 1.04E-02 | DOWN | 1.70 | 4.74E-03 | DOWN |
| NM_212463    | Ehmt2   | 1.51 | 3.43E-03 | DOWN | 1.62 | 3.10E-02 | DOWN |
| NM_001025660 | Ei24    | 1.56 | 8.82E-03 | DOWN | 2.35 | 1.06E-02 | DOWN |

|              |          |      |          |      |      |          |      |
|--------------|----------|------|----------|------|------|----------|------|
| NM_001100542 | Eif2s3x  | 1.28 | 2.12E-02 | DOWN | 1.50 | 1.95E-02 | DOWN |
| NM_001134955 | Elmo2    | 1.42 | 3.68E-03 | DOWN | 1.42 | 2.13E-02 | DOWN |
| NM_001109506 | Elmod2   | 1.51 | 7.34E-03 | DOWN | 2.03 | 3.68E-03 | DOWN |
| NM_001126098 | Elof1    | 1.37 | 1.63E-02 | DOWN | 1.64 | 2.71E-02 | DOWN |
| NM_134382    | Elovl5   | 1.99 | 3.86E-02 | DOWN | 3.01 | 1.57E-02 | DOWN |
| NM_001108782 | Elp6     | 1.40 | 3.05E-02 | DOWN | 1.57 | 9.76E-03 | DOWN |
| NM_001010968 | Eng      | 1.64 | 8.48E-03 | DOWN | 2.07 | 3.04E-02 | DOWN |
| NM_012554    | Eno1     | 1.28 | 4.16E-02 | DOWN | 1.52 | 3.29E-02 | DOWN |
| NM_001100729 | Enthd2   | 1.42 | 7.00E-03 | DOWN | 1.57 | 3.44E-02 | DOWN |
| NM_001033565 | Entpd8   | 1.71 | 1.45E-03 | DOWN | 2.91 | 2.11E-02 | DOWN |
| NM_001107858 | Epha1    | 1.37 | 2.14E-02 | DOWN | 2.08 | 3.63E-02 | DOWN |
| NM_001271384 | Epm2aip1 | 1.31 | 3.65E-02 | DOWN | 1.60 | 1.77E-02 | DOWN |
| NM_001108508 | Eps8l2   | 1.41 | 6.36E-03 | DOWN | 1.54 | 2.44E-02 | DOWN |
| NM_001172809 | Ercc2    | 1.29 | 2.13E-02 | DOWN | 1.61 | 2.08E-02 | DOWN |
| NM_001031644 | Ercc3    | 1.39 | 8.04E-03 | DOWN | 1.60 | 1.62E-02 | DOWN |
| NM_184050    | Ermp1    | 1.19 | 6.28E-03 | DOWN | 1.49 | 4.72E-03 | DOWN |
| NM_053961    | Erp29    | 1.41 | 1.13E-02 | DOWN | 1.67 | 3.39E-02 | DOWN |
| NM_001008317 | Erp44    | 1.24 | 2.64E-02 | DOWN | 2.07 | 7.11E-03 | DOWN |
| NM_198742    | Etfdh    | 1.37 | 2.69E-02 | DOWN | 2.12 | 6.13E-04 | DOWN |
| NM_001109243 | Eva1a    | 1.70 | 2.92E-02 | DOWN | 2.42 | 4.13E-02 | DOWN |
| NM_001024964 | Exoc3    | 1.34 | 8.76E-03 | DOWN | 1.54 | 1.98E-02 | DOWN |
| NM_001106432 | Exosc8   | 1.29 | 4.13E-02 | DOWN | 1.30 | 3.01E-02 | DOWN |
| NM_001025406 | Exosc9   | 1.29 | 4.70E-02 | DOWN | 1.66 | 7.84E-03 | DOWN |
| NM_001107751 | Ext2     | 1.33 | 3.08E-02 | DOWN | 1.47 | 4.70E-02 | DOWN |
| NM_001100704 | Extl2    | 1.50 | 4.35E-04 | DOWN | 1.44 | 2.05E-02 | DOWN |
| NM_024132    | Faah     | 1.42 | 6.08E-03 | DOWN | 2.87 | 2.97E-02 | DOWN |
| NM_013068    | Fabp2    | 1.32 | 2.38E-02 | DOWN | 1.83 | 4.38E-03 | DOWN |
| NM_017181    | Fah      | 1.39 | 1.29E-02 | DOWN | 2.66 | 3.45E-02 | DOWN |
| NM_001134834 | Fahd2a   | 1.52 | 2.62E-03 | DOWN | 1.73 | 1.46E-02 | DOWN |
| NM_001127451 | Fam103a1 | 1.27 | 2.78E-02 | DOWN | 1.80 | 2.95E-03 | DOWN |
| NM_001191816 | Fam120a  | 1.20 | 4.70E-02 | DOWN | 1.52 | 1.97E-02 | DOWN |
| NM_001107466 | Fam120b  | 1.25 | 3.01E-02 | DOWN | 1.69 | 6.76E-03 | DOWN |
| NM_001166586 | Fam122b  | 1.24 | 3.79E-02 | DOWN | 1.34 | 6.85E-03 | DOWN |
| NM_001013878 | Fam149b1 | 1.32 | 1.25E-02 | DOWN | 1.55 | 2.52E-02 | DOWN |
| NM_001029903 | Fam162a  | 1.48 | 7.83E-03 | DOWN | 1.68 | 4.54E-03 | DOWN |
| NM_001108494 | Fam168a  | 1.43 | 1.29E-02 | DOWN | 1.40 | 3.78E-02 | DOWN |
| NM_001106401 | Fam172a  | 1.26 | 4.67E-03 | DOWN | 1.49 | 1.21E-02 | DOWN |
| NM_001106122 | Fam188a  | 1.35 | 2.27E-02 | DOWN | 2.35 | 1.67E-02 | DOWN |
| NM_001170408 | Fam193b  | 1.34 | 4.74E-02 | DOWN | 1.75 | 1.98E-02 | DOWN |
| NM_001012238 | Fam20c   | 1.62 | 3.92E-02 | DOWN | 2.11 | 6.09E-03 | DOWN |
| NM_001007688 | Fam210a  | 1.27 | 5.47E-03 | DOWN | 1.62 | 7.91E-03 | DOWN |

|              |            |      |          |      |      |          |      |
|--------------|------------|------|----------|------|------|----------|------|
| NM_001106547 | Fam210b    | 1.80 | 5.40E-03 | DOWN | 2.20 | 2.17E-02 | DOWN |
| NM_001106838 | Fam214a    | 1.20 | 4.74E-02 | DOWN | 1.53 | 4.88E-03 | DOWN |
| NM_001013920 | Fam227b    | 1.58 | 2.65E-03 | DOWN | 1.37 | 1.21E-02 | DOWN |
| NM_001127681 | Fam45a     | 1.38 | 1.94E-02 | DOWN | 1.52 | 1.42E-02 | DOWN |
| NM_001170573 | Fam50a     | 1.39 | 3.98E-02 | DOWN | 1.73 | 1.80E-03 | DOWN |
| NM_001025118 | Fam63a     | 1.49 | 1.33E-02 | DOWN | 1.92 | 2.53E-03 | DOWN |
| NM_001008327 | Fam96a     | 1.31 | 2.81E-03 | DOWN | 1.75 | 2.70E-03 | DOWN |
| NM_001191718 | Fance      | 1.58 | 1.28E-03 | DOWN | 1.65 | 3.08E-02 | DOWN |
| NM_001013139 | Fars2      | 1.38 | 1.13E-02 | DOWN | 1.65 | 1.11E-02 | DOWN |
| NM_012558    | Fbp1       | 1.45 | 3.04E-02 | DOWN | 2.88 | 2.66E-02 | DOWN |
| NM_001037770 | Fbxo22     | 1.52 | 2.05E-02 | DOWN | 1.55 | 3.02E-02 | DOWN |
| NM_001014239 | Fbxo25     | 1.29 | 4.68E-02 | DOWN | 1.53 | 2.24E-02 | DOWN |
| NM_001109606 | Fbxo3      | 1.37 | 5.06E-03 | DOWN | 1.45 | 3.37E-02 | DOWN |
| NM_001107672 | Fbxo4      | 1.27 | 4.30E-02 | DOWN | 1.85 | 8.32E-03 | DOWN |
| NM_001012050 | Fbxo8      | 1.29 | 2.02E-02 | DOWN | 2.14 | 1.84E-03 | DOWN |
| NM_001025730 | Fbxw5      | 1.56 | 1.69E-03 | DOWN | 1.56 | 2.73E-02 | DOWN |
| NM_001191931 | Fcrlb      | 1.07 | 3.71E-02 | UP   | 1.08 | 2.90E-02 | UP   |
| NM_024153    | Fdxr       | 1.49 | 2.09E-03 | DOWN | 1.94 | 1.95E-02 | DOWN |
| NM_001108434 | Fech       | 1.36 | 2.67E-02 | DOWN | 1.83 | 4.43E-03 | DOWN |
| NM_001106928 | Fer        | 1.37 | 1.00E-02 | DOWN | 1.39 | 1.90E-02 | DOWN |
| NM_001013932 | Fggy       | 1.49 | 3.84E-04 | DOWN | 1.48 | 3.39E-02 | DOWN |
| NM_172334    | Fibp       | 1.41 | 4.46E-03 | DOWN | 1.53 | 8.55E-03 | DOWN |
| NM_001047096 | Fig4       | 1.19 | 3.13E-02 | DOWN | 1.94 | 2.83E-03 | DOWN |
| NM_001106484 | Figl       | 1.59 | 4.22E-02 | DOWN | 1.55 | 2.30E-02 | DOWN |
| NM_001191863 | Fkbp4      | 1.38 | 4.81E-02 | DOWN | 2.03 | 1.45E-03 | DOWN |
| NM_001110138 | Flad1      | 1.51 | 2.25E-02 | DOWN | 1.45 | 2.74E-02 | DOWN |
| NM_053832    | Foxj1      | 1.08 | 3.06E-02 | DOWN | 1.26 | 4.50E-02 | UP   |
| NM_001290133 | Frg1       | 1.31 | 3.76E-02 | DOWN | 1.67 | 3.11E-03 | DOWN |
| NM_012848    | Fth1       | 1.49 | 1.38E-02 | DOWN | 1.88 | 7.37E-03 | DOWN |
| NM_001107125 | Ftsj2      | 1.59 | 1.11E-03 | DOWN | 1.85 | 1.18E-03 | DOWN |
| NM_001004218 | Fuca2      | 1.49 | 1.74E-03 | DOWN | 1.69 | 4.98E-03 | DOWN |
| NM_001191952 | Fxn        | 1.41 | 2.46E-02 | DOWN | 1.57 | 1.06E-02 | DOWN |
| NM_001100504 | Gadd45gip1 | 1.47 | 1.52E-02 | DOWN | 1.60 | 7.71E-03 | DOWN |
| NM_001007704 | Galm       | 1.50 | 1.08E-02 | DOWN | 2.11 | 4.81E-02 | DOWN |
| NM_001013089 | Galt       | 2.41 | 1.06E-04 | DOWN | 2.26 | 1.22E-02 | DOWN |
| NM_012793    | Gamt       | 1.40 | 3.24E-02 | DOWN | 2.03 | 3.24E-02 | DOWN |
| NM_001145840 | Ganc       | 1.19 | 3.38E-02 | DOWN | 1.56 | 8.01E-03 | DOWN |
| NM_001108339 | Gatc       | 1.34 | 1.60E-02 | DOWN | 1.58 | 1.94E-02 | DOWN |
| NM_001024277 | Gcat       | 1.63 | 2.36E-03 | DOWN | 1.98 | 4.55E-02 | DOWN |
| NM_001107633 | Gcc2       | 1.31 | 1.32E-02 | DOWN | 1.55 | 1.85E-02 | DOWN |
| NM_001108896 | Gcdh       | 1.38 | 3.52E-02 | DOWN | 2.22 | 3.79E-02 | DOWN |

|                |        |      |          |      |      |          |      |
|----------------|--------|------|----------|------|------|----------|------|
| NM_172091      | Gcgr   | 1.36 | 3.33E-02 | DOWN | 2.55 | 3.81E-02 | DOWN |
| NM_133595      | Gchfr  | 1.42 | 2.51E-02 | DOWN | 2.57 | 2.84E-02 | DOWN |
| NM_001168664   | Gcn1l1 | 1.50 | 3.35E-03 | DOWN | 1.66 | 1.28E-02 | DOWN |
| NM_031749      | Gcs1   | 1.33 | 3.79E-02 | DOWN | 1.73 | 3.32E-02 | DOWN |
| NM_133598      | Gcsh   | 1.34 | 1.01E-02 | DOWN | 2.31 | 2.46E-02 | DOWN |
| NM_017276      | Gdi2   | 1.29 | 1.16E-02 | DOWN | 1.64 | 6.59E-03 | DOWN |
| NM_053389      | Gemin2 | 1.42 | 7.52E-03 | DOWN | 1.45 | 3.08E-02 | DOWN |
| NM_012566      | Gfi1   | 1.22 | 1.92E-02 | DOWN | 1.27 | 1.60E-03 | DOWN |
| NM_001100665   | Gfm2   | 1.20 | 4.53E-02 | DOWN | 1.48 | 4.38E-03 | DOWN |
| NM_001100519   | Gga2   | 1.52 | 3.95E-02 | DOWN | 1.96 | 1.92E-02 | DOWN |
| NM_001191651   | Ghdc   | 1.38 | 3.19E-02 | DOWN | 1.63 | 3.47E-02 | DOWN |
| NM_001113782   | Gimd1  | 2.29 | 4.84E-03 | UP   | 3.17 | 2.25E-03 | DOWN |
| NM_001106190   | Gins2  | 1.40 | 4.06E-02 | DOWN | 1.52 | 1.31E-02 | DOWN |
| NM_024381      | Gk     | 2.50 | 5.67E-03 | DOWN | 2.80 | 4.25E-02 | DOWN |
| NM_001108820   | Gla    | 1.31 | 1.75E-02 | DOWN | 1.80 | 2.91E-02 | DOWN |
| NM_207594      | Glo1   | 1.31 | 4.63E-02 | DOWN | 1.57 | 2.93E-02 | DOWN |
| NM_001108722   | Glrx5  | 1.37 | 2.87E-02 | DOWN | 2.12 | 2.15E-03 | DOWN |
| NM_172335      | Gm2a   | 1.36 | 8.40E-03 | DOWN | 2.31 | 2.79E-02 | DOWN |
| NM_001025056   | Gmppa  | 1.48 | 4.05E-03 | DOWN | 1.61 | 4.61E-02 | DOWN |
| NM_001013036   | Gmpr2  | 1.36 | 1.43E-02 | DOWN | 1.86 | 1.86E-02 | DOWN |
| NM_053660      | Gng10  | 1.40 | 1.20E-02 | DOWN | 1.98 | 9.70E-03 | DOWN |
| NM_017084      | Gnmt   | 2.06 | 2.88E-02 | DOWN | 3.82 | 1.53E-02 | DOWN |
| NM_001007731   | Golga7 | 1.31 | 1.24E-02 | DOWN | 1.63 | 9.00E-03 | DOWN |
| NM_001109070   | Golt1a | 1.67 | 3.30E-02 | DOWN | 2.61 | 1.54E-02 | DOWN |
| NM_001107631   | Gopc   | 1.31 | 2.87E-02 | DOWN | 1.55 | 3.34E-02 | DOWN |
| NM_013177      | Got2   | 1.45 | 2.57E-03 | DOWN | 1.63 | 1.07E-02 | DOWN |
| NM_022865      | Gphn   | 1.35 | 3.41E-02 | DOWN | 1.85 | 1.21E-02 | DOWN |
| NM_001127572   | Gpn1   | 1.38 | 1.92E-02 | DOWN | 1.65 | 1.12E-02 | DOWN |
| NM_001139486   | Gpr89b | 1.30 | 2.88E-02 | DOWN | 1.88 | 3.02E-02 | DOWN |
| NM_030846      | Grb2   | 1.42 | 3.95E-03 | DOWN | 1.84 | 6.74E-03 | DOWN |
| NM_001198725.1 | Grcc10 | 1.82 | 1.08E-02 | DOWN | 1.53 | 2.38E-02 | DOWN |
| NM_019282      | Grem1  | 1.23 | 1.12E-02 | UP   | 1.66 | 3.80E-02 | UP   |
| NM_030829      | Grk5   | 1.31 | 4.22E-03 | DOWN | 1.34 | 3.22E-02 | DOWN |
| NM_001106840   | Gsta4  | 1.51 | 1.67E-02 | DOWN | 1.78 | 4.90E-02 | DOWN |
| NM_177426      | Gstm2  | 1.79 | 5.61E-03 | DOWN | 1.87 | 2.44E-02 | DOWN |
| NM_031154      | Gstm7  | 1.65 | 4.09E-04 | DOWN | 1.99 | 1.41E-02 | DOWN |
| NM_001109445   | Gstz1  | 1.41 | 1.11E-02 | DOWN | 2.80 | 2.92E-02 | DOWN |
| NM_001107318   | Gtf2e2 | 1.30 | 4.21E-02 | DOWN | 1.82 | 2.59E-02 | DOWN |
| NM_001077428   | Gtf2h2 | 1.36 | 1.41E-02 | DOWN | 1.70 | 2.47E-03 | DOWN |
| NM_001024236   | Gtf2h3 | 1.23 | 4.70E-02 | DOWN | 1.37 | 4.52E-02 | DOWN |
| NM_212501      | Gtf2h4 | 1.51 | 9.76E-03 | DOWN | 1.74 | 1.01E-02 | DOWN |

|              |           |      |          |      |      |          |      |
|--------------|-----------|------|----------|------|------|----------|------|
| NM_001126088 | Gtf2h5    | 1.39 | 2.39E-02 | DOWN | 1.65 | 9.66E-03 | DOWN |
| NM_001001512 | Gtf2i     | 1.40 | 1.71E-02 | DOWN | 1.78 | 8.58E-03 | DOWN |
| NM_001001504 | Gtf2ird1  | 1.53 | 4.73E-02 | DOWN | 1.50 | 3.71E-02 | DOWN |
| NM_001025120 | Gtf3c2    | 1.35 | 2.07E-02 | DOWN | 1.55 | 1.68E-02 | DOWN |
| NM_001100815 | Gtpbp10   | 1.46 | 2.02E-03 | DOWN | 1.59 | 2.04E-02 | DOWN |
| NM_012770    | Gucy1b2   | 1.81 | 2.68E-03 | DOWN | 3.01 | 2.58E-02 | DOWN |
| NM_001107215 | Guf1      | 1.36 | 2.40E-02 | DOWN | 1.58 | 1.80E-02 | DOWN |
| NM_022220    | Gulo      | 1.36 | 1.74E-02 | DOWN | 3.12 | 1.77E-02 | DOWN |
| NM_017015    | Gusb      | 1.58 | 3.90E-04 | DOWN | 1.71 | 4.33E-02 | DOWN |
| NM_017182    | H2afy     | 1.33 | 2.05E-02 | DOWN | 1.54 | 4.67E-02 | DOWN |
| NM_001135807 | H2afy2    | 1.31 | 2.47E-02 | DOWN | 1.56 | 7.68E-03 | DOWN |
| NM_053985    | H3f3b     | 1.35 | 2.84E-02 | DOWN | 1.72 | 1.64E-02 | DOWN |
| NM_053493    | Hacl1     | 1.90 | 6.72E-03 | UP   | 5.22 | 2.25E-03 | DOWN |
| NM_057186    | Hadh      | 1.38 | 3.01E-02 | DOWN | 2.27 | 7.34E-03 | DOWN |
| NM_017159    | Hal       | 2.11 | 1.56E-03 | DOWN | 2.76 | 3.69E-02 | DOWN |
| NM_001191732 | Hccs      | 1.38 | 3.24E-02 | DOWN | 1.70 | 6.59E-03 | DOWN |
| NM_001100492 | Hcfc1r1   | 1.50 | 4.34E-03 | DOWN | 1.58 | 2.61E-02 | DOWN |
| NM_001005900 | Hcst      | 1.42 | 7.30E-03 | DOWN | 1.38 | 2.58E-02 | DOWN |
| NM_001035000 | Hdac10    | 1.43 | 9.06E-04 | DOWN | 1.46 | 3.27E-02 | DOWN |
| NM_001126373 | Hdac8     | 1.43 | 5.27E-04 | DOWN | 1.56 | 8.10E-03 | DOWN |
| NM_133548    | Hdgfrp2   | 1.48 | 9.32E-03 | DOWN | 1.85 | 6.63E-04 | DOWN |
| NM_001109511 | Hdhd3     | 2.29 | 4.41E-04 | DOWN | 3.29 | 2.13E-03 | DOWN |
| NM_001191064 | Heatr5b   | 1.45 | 1.21E-02 | DOWN | 1.48 | 1.04E-02 | DOWN |
| NM_001106371 | Hells     | 1.41 | 1.42E-02 | DOWN | 1.86 | 1.01E-02 | DOWN |
| NM_001012074 | Herc4     | 1.25 | 4.24E-02 | DOWN | 1.76 | 1.30E-02 | DOWN |
| NM_001142562 | Hexdc     | 1.43 | 1.48E-02 | DOWN | 1.92 | 4.45E-03 | DOWN |
| NM_001025136 | Hexim1    | 1.37 | 4.33E-02 | DOWN | 1.84 | 5.52E-03 | DOWN |
| NM_001107054 | Hexim2    | 1.34 | 2.43E-02 | DOWN | 1.57 | 1.48E-02 | DOWN |
| NM_001012145 | Hgd       | 1.94 | 1.99E-03 | DOWN | 2.80 | 3.65E-02 | DOWN |
| NM_022243    | Hibadh    | 1.27 | 1.36E-02 | DOWN | 2.01 | 1.55E-02 | DOWN |
| NM_001100825 | Hint3     | 1.30 | 1.73E-02 | DOWN | 1.51 | 1.59E-02 | DOWN |
| NM_001134763 | Hip1r     | 1.52 | 3.93E-02 | DOWN | 1.78 | 4.02E-02 | DOWN |
| NM_022647    | Hist1h2bl | 1.15 | 4.99E-02 | DOWN | 1.15 | 4.07E-02 | DOWN |
| NM_001106114 | Hist1h2bo | 1.23 | 6.48E-03 | DOWN | 1.21 | 5.01E-03 | DOWN |
| NM_013168    | Hmbs      | 1.34 | 3.95E-02 | DOWN | 1.70 | 1.42E-02 | DOWN |
| NM_001013184 | Hmgn1     | 1.41 | 1.89E-03 | DOWN | 1.63 | 2.16E-02 | DOWN |
| NM_001025624 | Hmgn2     | 1.38 | 4.71E-02 | DOWN | 1.70 | 3.44E-02 | DOWN |
| NM_001111294 | Hnrnpa3   | 1.44 | 1.85E-02 | DOWN | 1.51 | 4.04E-02 | DOWN |
| NM_057141    | Hnrnpk    | 1.25 | 4.51E-02 | DOWN | 1.50 | 2.23E-02 | DOWN |
| NM_001134760 | Hnrnpl    | 1.24 | 1.80E-02 | DOWN | 1.61 | 1.00E-02 | DOWN |
| NM_024404    | Hnrpd     | 1.93 | 2.50E-02 | DOWN | 1.90 | 3.01E-02 | DOWN |

|              |         |      |          |      |      |          |      |
|--------------|---------|------|----------|------|------|----------|------|
| NM_152849    | Homez   | 1.76 | 2.66E-04 | DOWN | 1.64 | 8.15E-03 | DOWN |
| NM_199108    | Hp1bp3  | 1.28 | 3.12E-02 | DOWN | 1.51 | 1.99E-02 | DOWN |
| NM_173119    | Hsbp1   | 1.33 | 2.96E-02 | DOWN | 1.81 | 5.93E-03 | DOWN |
| NM_212529    | Hsd17b8 | 1.36 | 2.56E-02 | DOWN | 1.64 | 1.41E-02 | DOWN |
| NM_012584    | Hsd3b5  | 1.50 | 6.20E-03 | DOWN | 3.22 | 1.71E-02 | DOWN |
| NM_001108259 | Htatsf1 | 1.20 | 3.49E-02 | DOWN | 1.51 | 1.93E-02 | DOWN |
| NM_001106599 | Htra2   | 1.32 | 1.02E-02 | DOWN | 1.47 | 1.91E-02 | DOWN |
| NM_024357    | Htt     | 1.23 | 2.71E-02 | DOWN | 1.47 | 1.43E-02 | DOWN |
| NM_001191656 | Ict1    | 1.38 | 4.00E-02 | DOWN | 1.58 | 1.74E-02 | DOWN |
| NM_175582    | Id4     | 1.77 | 4.76E-03 | DOWN | 2.30 | 3.03E-02 | DOWN |
| NM_001037362 | Idnk    | 1.25 | 6.94E-03 | DOWN | 1.66 | 3.17E-02 | DOWN |
| NM_001172084 | Idua    | 1.42 | 2.54E-02 | DOWN | 1.54 | 3.87E-02 | DOWN |
| NM_212505    | Ier3    | 1.86 | 2.43E-02 | DOWN | 1.88 | 4.36E-02 | DOWN |
| NM_001108647 | Iffo1   | 1.34 | 3.48E-02 | DOWN | 1.84 | 1.08E-02 | DOWN |
| NM_001009625 | Ifi35   | 1.53 | 2.27E-02 | DOWN | 2.04 | 4.13E-02 | DOWN |
| NM_001105893 | Ifnar1  | 1.37 | 3.03E-02 | DOWN | 1.56 | 4.19E-02 | DOWN |
| NM_001130495 | Ift27   | 1.45 | 3.96E-02 | DOWN | 1.73 | 4.32E-03 | DOWN |
| NM_001177685 | Ift52   | 1.47 | 1.66E-03 | DOWN | 1.73 | 5.14E-03 | DOWN |
| NM_001013120 | Igsf11  | 1.47 | 2.95E-02 | DOWN | 2.09 | 1.20E-02 | DOWN |
| NM_001005537 | Ik      | 1.36 | 1.45E-02 | DOWN | 1.57 | 1.81E-02 | DOWN |
| NM_139116    | Il11ra1 | 1.85 | 5.92E-04 | DOWN | 1.94 | 2.17E-03 | DOWN |
| NM_001170604 | Il12rb1 | 1.24 | 2.46E-03 | DOWN | 1.18 | 2.33E-02 | DOWN |
| NM_001107883 | Il17ra  | 1.39 | 3.21E-02 | DOWN | 2.32 | 2.28E-02 | DOWN |
| NM_133380    | Il4r    | 1.48 | 1.26E-02 | DOWN | 2.15 | 8.25E-03 | DOWN |
| NM_133409    | Ilk     | 1.33 | 1.50E-02 | DOWN | 1.66 | 2.47E-02 | DOWN |
| NM_001108738 | Ilvbl   | 1.45 | 2.90E-02 | DOWN | 1.77 | 2.28E-02 | DOWN |
| NM_001009700 | Imp4    | 1.30 | 2.32E-02 | DOWN | 1.66 | 1.11E-02 | DOWN |
| NM_001013900 | Ino80e  | 1.40 | 3.85E-02 | DOWN | 1.60 | 2.46E-02 | DOWN |
| NM_001013859 | Inpp5k  | 1.24 | 1.76E-02 | DOWN | 1.48 | 4.12E-02 | DOWN |
| NM_001134416 | Ints10  | 1.41 | 3.34E-03 | DOWN | 1.53 | 7.34E-03 | DOWN |
| NM_001191629 | Ints4   | 1.54 | 6.62E-04 | DOWN | 1.44 | 4.26E-02 | DOWN |
| NM_001107180 | Ipo9    | 1.34 | 3.89E-02 | DOWN | 1.39 | 4.79E-02 | DOWN |
| NM_001014230 | Iqcg    | 1.41 | 2.24E-02 | DOWN | 2.35 | 8.06E-03 | DOWN |
| NM_001025422 | Irak2   | 1.45 | 2.35E-02 | DOWN | 1.69 | 3.02E-02 | DOWN |
| NM_001006969 | Irf3    | 1.38 | 2.52E-02 | DOWN | 1.95 | 1.03E-02 | DOWN |
| NM_001105936 | Iscu    | 1.41 | 1.42E-02 | DOWN | 1.91 | 3.33E-03 | DOWN |
| NM_001014242 | Isoc1   | 1.36 | 2.33E-03 | DOWN | 2.00 | 2.40E-02 | DOWN |
| NM_001008367 | Isoc2b  | 1.50 | 3.03E-03 | DOWN | 2.18 | 3.56E-03 | DOWN |
| NM_031046    | Itpr2   | 1.31 | 2.73E-02 | DOWN | 2.03 | 1.56E-02 | DOWN |
| NM_012592    | Ivd     | 1.40 | 1.26E-03 | DOWN | 1.78 | 1.46E-02 | DOWN |
| NM_001033894 | Jakmip1 | 1.16 | 3.38E-02 | DOWN | 1.58 | 2.49E-02 | UP   |

|              |          |      |          |      |      |          |      |
|--------------|----------|------|----------|------|------|----------|------|
| NM_001114656 | Jmjd7    | 1.49 | 1.71E-02 | DOWN | 1.46 | 2.28E-02 | DOWN |
| NM_001014116 | Jmjd8    | 1.32 | 1.50E-02 | DOWN | 1.55 | 2.74E-02 | DOWN |
| NM_001037197 | Kank1    | 1.40 | 4.73E-02 | DOWN | 1.80 | 3.46E-03 | DOWN |
| NM_001270413 | Kank2    | 1.88 | 1.37E-02 | DOWN | 1.83 | 1.32E-02 | DOWN |
| NM_001015037 | Kat3     | 1.26 | 4.18E-02 | DOWN | 2.99 | 1.50E-02 | DOWN |
| NM_001024746 | Katnb1   | 1.60 | 5.88E-05 | DOWN | 1.34 | 2.34E-02 | DOWN |
| NM_001107199 | Kctd3    | 1.23 | 2.72E-02 | DOWN | 1.57 | 5.96E-03 | DOWN |
| NM_001128194 | Kctd7    | 1.43 | 1.07E-02 | DOWN | 1.50 | 1.27E-03 | DOWN |
| NM_001108871 | Kctd9    | 1.50 | 1.82E-02 | DOWN | 1.52 | 1.35E-02 | DOWN |
| NM_001017385 | Kdelr1   | 1.26 | 3.15E-02 | DOWN | 1.61 | 1.96E-02 | DOWN |
| NM_001013122 | Kdelr2   | 1.29 | 1.80E-02 | DOWN | 1.65 | 3.29E-02 | DOWN |
| NM_001004268 | Kdf1     | 1.43 | 6.37E-04 | DOWN | 1.51 | 4.85E-02 | DOWN |
| NM_001107177 | Kdm5b    | 1.37 | 8.29E-03 | DOWN | 1.59 | 9.89E-03 | DOWN |
| NM_001108829 | Kdm6b    | 1.49 | 2.08E-02 | DOWN | 1.57 | 3.93E-02 | DOWN |
| NM_198752    | Kifc2    | 1.80 | 1.75E-02 | DOWN | 2.64 | 4.46E-03 | DOWN |
| NM_001009601 | Klc4     | 1.38 | 2.90E-02 | DOWN | 1.79 | 1.78E-02 | DOWN |
| NM_001017511 | Klhl36   | 1.40 | 3.47E-03 | DOWN | 1.50 | 3.02E-02 | DOWN |
| NM_001047093 | Klhl5    | 1.45 | 2.13E-03 | DOWN | 1.68 | 1.33E-02 | DOWN |
| NM_001107944 | Klhl9    | 1.28 | 1.07E-02 | DOWN | 1.45 | 3.84E-02 | DOWN |
| NM_001100851 | Kmt2e    | 1.21 | 2.07E-02 | DOWN | 1.45 | 1.37E-02 | DOWN |
| NM_053483    | Kpna2    | 1.63 | 3.00E-02 | DOWN | 2.79 | 9.80E-05 | DOWN |
| NM_001106444 | Krtcap2  | 1.42 | 5.15E-03 | DOWN | 1.75 | 2.14E-02 | DOWN |
| NM_001025143 | Kxd1     | 1.39 | 1.05E-02 | DOWN | 1.60 | 2.67E-02 | DOWN |
| NM_053902    | Kynu     | 2.72 | 3.39E-03 | DOWN | 4.00 | 1.73E-02 | DOWN |
| NM_001108028 | L2hgdh   | 1.34 | 1.45E-02 | DOWN | 1.84 | 2.51E-03 | DOWN |
| NM_212513    | Lag3     | 1.56 | 3.72E-03 | DOWN | 2.21 | 2.87E-04 | DOWN |
| NM_199102    | Lamtor1  | 1.24 | 4.63E-02 | DOWN | 1.42 | 4.95E-02 | DOWN |
| NM_001106462 | Lamtor5  | 1.32 | 1.95E-02 | DOWN | 1.67 | 8.55E-03 | DOWN |
| NM_001014187 | Lancl2   | 1.20 | 3.12E-02 | DOWN | 1.28 | 2.79E-02 | DOWN |
| NM_001044290 | Larp7    | 1.33 | 1.53E-02 | DOWN | 1.49 | 2.10E-02 | DOWN |
| NM_001008893 | Ldhd     | 1.35 | 2.41E-02 | DOWN | 1.55 | 3.78E-02 | DOWN |
| NM_001109271 | Ldlrap1  | 1.59 | 4.58E-02 | DOWN | 1.99 | 2.71E-02 | DOWN |
| NM_001106218 | Leng1    | 1.58 | 3.19E-03 | DOWN | 1.64 | 1.02E-02 | DOWN |
| NM_001037790 | Leng8    | 1.43 | 6.95E-03 | DOWN | 1.43 | 4.70E-02 | DOWN |
| NM_001005548 | Leo1     | 1.44 | 1.21E-02 | DOWN | 1.75 | 1.00E-03 | DOWN |
| NM_001013188 | Leprotl1 | 1.37 | 1.64E-02 | DOWN | 1.67 | 1.57E-02 | DOWN |
| NM_053862    | Lgals8   | 1.49 | 3.11E-02 | DOWN | 2.20 | 1.08E-02 | DOWN |
| NM_001012037 | Lias     | 1.49 | 7.70E-04 | DOWN | 1.72 | 1.16E-02 | DOWN |
| NM_001012011 | Lig3     | 1.58 | 1.87E-02 | DOWN | 1.66 | 2.86E-02 | DOWN |
| NM_001025715 | Limd2    | 1.42 | 5.54E-03 | DOWN | 1.53 | 4.59E-02 | DOWN |
| NM_001012163 | Lims2    | 1.87 | 6.01E-04 | DOWN | 1.79 | 6.87E-03 | DOWN |

|              |              |       |          |      |       |          |      |
|--------------|--------------|-------|----------|------|-------|----------|------|
| NM_001106245 | Lin37        | 1.33  | 2.65E-02 | DOWN | 1.58  | 7.46E-03 | DOWN |
| NM_001105735 | Litaf        | 1.71  | 7.67E-03 | DOWN | 1.73  | 3.52E-02 | DOWN |
| NM_001115024 | Lman2        | 1.40  | 4.79E-03 | DOWN | 1.80  | 8.98E-03 | DOWN |
| NM_001079939 | Lmf2         | 1.26  | 3.08E-02 | DOWN | 1.60  | 2.20E-02 | DOWN |
| NM_001103356 | LOC100125364 | 1.29  | 1.77E-02 | DOWN | 1.83  | 1.58E-02 | DOWN |
| NM_001139487 | LOC100125368 | 1.64  | 3.93E-02 | DOWN | 1.77  | 4.58E-02 | DOWN |
| NM_001127606 | LOC100158225 | 1.47  | 2.18E-02 | DOWN | 2.06  | 1.42E-02 | DOWN |
| NM_001131003 | LOC100174910 | 1.31  | 1.14E-02 | DOWN | 1.69  | 8.15E-03 | DOWN |
| NM_001142941 | LOC100233176 | 1.42  | 2.01E-02 | DOWN | 1.62  | 1.93E-02 | DOWN |
| NM_001270388 | LOC100360619 | 2.05  | 1.67E-02 | DOWN | 2.12  | 2.88E-02 | DOWN |
| NM_001177816 | LOC100361645 | 1.56  | 2.78E-02 | DOWN | 3.38  | 4.11E-03 | DOWN |
| NM_001177819 | LOC100362110 | 1.44  | 2.28E-02 | DOWN | 2.75  | 4.63E-03 | DOWN |
| NM_001271975 | LOC100365921 | 1.50  | 1.00E-02 | DOWN | 2.05  | 9.17E-04 | DOWN |
| NM_001277222 | LOC100911483 | 1.34  | 3.69E-02 | DOWN | 1.54  | 3.85E-02 | DOWN |
| NR_110377    | LOC102723236 | 10.91 | 2.82E-02 | DOWN | 10.87 | 2.72E-02 | DOWN |
| NR_110639    | LOC287004    | 1.23  | 1.15E-02 | DOWN | 1.26  | 1.31E-02 | DOWN |
| NM_001134533 | LOC301124    | 1.31  | 3.84E-02 | DOWN | 1.72  | 1.81E-02 | DOWN |
| NM_001037190 | LOC303448    | 1.50  | 3.12E-02 | DOWN | 2.26  | 8.97E-04 | DOWN |
| NM_001013981 | LOC304396    | 1.37  | 2.88E-02 | DOWN | 1.48  | 1.51E-02 | DOWN |
| NM_001134574 | LOC361646    | 1.31  | 1.76E-02 | DOWN | 1.79  | 1.11E-02 | DOWN |
| NM_001109058 | LOC498122    | 1.34  | 2.49E-02 | DOWN | 1.54  | 4.96E-02 | DOWN |
| NM_001166307 | LOC498592    | 1.61  | 1.70E-02 | DOWN | 2.17  | 8.62E-03 | DOWN |
| NM_001024308 | LOC499742    | 1.61  | 2.82E-02 | DOWN | 1.88  | 2.75E-02 | DOWN |
| NM_001100869 | LOC499781    | 1.28  | 2.79E-02 | DOWN | 1.29  | 3.81E-02 | DOWN |
| NM_001047958 | LOC500594    | 1.12  | 1.50E-02 | DOWN | 1.14  | 1.35E-03 | DOWN |
| NM_022271    | LOC64038     | 1.50  | 2.37E-02 | DOWN | 1.91  | 1.09E-02 | DOWN |
| NM_001037658 | LOC652955    | 1.31  | 2.87E-02 | DOWN | 2.04  | 3.88E-03 | DOWN |
| NM_001101006 | LOC683077    | 1.32  | 1.95E-02 | DOWN | 1.58  | 1.33E-02 | DOWN |
| NM_001145273 | LOC688869    | 1.38  | 3.98E-02 | DOWN | 1.56  | 2.84E-02 | DOWN |
| NM_001127573 | LOC689226    | 1.28  | 1.67E-02 | DOWN | 1.74  | 3.18E-03 | DOWN |
| NM_001109581 | LOC690349    | 1.46  | 9.87E-03 | DOWN | 1.95  | 2.05E-03 | DOWN |
| NM_001195482 | LOC690871    | 1.39  | 4.57E-03 | DOWN | 1.64  | 3.55E-02 | DOWN |
| NM_001198796 | LOC691849    | 1.39  | 2.12E-02 | DOWN | 1.97  | 1.77E-03 | DOWN |
| NM_001135566 | LOC691921    | 1.43  | 4.85E-02 | DOWN | 1.50  | 4.37E-02 | DOWN |
| NM_133404    | Lonp1        | 1.25  | 1.74E-02 | DOWN | 1.64  | 8.66E-03 | DOWN |
| NM_001191585 | Lonrf3       | 1.93  | 3.08E-02 | UP   | 2.05  | 1.50E-02 | DOWN |
| NM_001109376 | Lpgat1       | 1.32  | 4.00E-02 | DOWN | 2.13  | 4.08E-02 | DOWN |
| NM_001108555 | Lrba         | 1.26  | 8.46E-03 | DOWN | 1.70  | 1.08E-02 | DOWN |
| NM_001127551 | Lrch4        | 1.60  | 2.90E-03 | DOWN | 1.49  | 4.25E-02 | DOWN |
| NM_001106321 | Lrp5         | 1.90  | 5.40E-03 | DOWN | 1.81  | 5.24E-03 | DOWN |
| NM_001108486 | Lrrc28       | 1.26  | 4.33E-02 | DOWN | 1.84  | 5.80E-03 | DOWN |



|              |        |      |          |      |      |          |      |
|--------------|--------|------|----------|------|------|----------|------|
| NM_001009710 | Lrrc41 | 1.32 | 3.31E-02 | DOWN | 1.52 | 3.12E-02 | DOWN |
| NM_001025653 | Lrrc42 | 1.45 | 1.33E-02 | DOWN | 1.50 | 2.07E-02 | DOWN |
| NM_001008280 | Lrrc59 | 1.54 | 1.20E-02 | DOWN | 1.76 | 3.60E-02 | DOWN |
| NM_001109231 | Lrrc61 | 1.72 | 4.08E-03 | DOWN | 1.94 | 1.32E-02 | DOWN |
| NM_001107701 | Lrrc71 | 1.34 | 4.99E-02 | DOWN | 1.77 | 7.62E-03 | DOWN |
| NM_001107204 | Lrrc8b | 1.39 | 1.83E-02 | DOWN | 1.86 | 1.49E-02 | DOWN |
| NM_001008338 | Lrrc8d | 1.61 | 1.31E-02 | DOWN | 2.15 | 1.25E-02 | DOWN |
| NM_001108976 | Lsm10  | 1.42 | 2.74E-02 | DOWN | 1.88 | 3.58E-03 | DOWN |
| NM_001107289 | Lsm5   | 1.29 | 3.40E-02 | DOWN | 1.75 | 2.12E-03 | DOWN |
| NM_001108732 | Lsm7   | 1.24 | 4.60E-02 | DOWN | 1.56 | 1.91E-02 | DOWN |
| NM_001008315 | Ltbr   | 1.51 | 3.41E-02 | DOWN | 1.99 | 3.17E-02 | DOWN |
| NM_001107853 | Luc7l2 | 1.40 | 3.65E-02 | DOWN | 1.76 | 4.23E-03 | DOWN |
| NM_013006    | Lypla1 | 1.26 | 4.60E-02 | DOWN | 2.14 | 7.08E-04 | DOWN |
| NM_031342    | Lypla2 | 1.38 | 1.07E-02 | DOWN | 1.72 | 1.70E-02 | DOWN |
| NM_001105986 | Lypla1 | 1.43 | 2.61E-03 | DOWN | 1.87 | 1.90E-02 | DOWN |
| NM_001126096 | Lym2   | 1.26 | 3.20E-02 | DOWN | 1.71 | 2.55E-03 | DOWN |
| NM_001134729 | Lym7   | 1.35 | 1.50E-02 | DOWN | 1.94 | 2.53E-02 | DOWN |
| NM_001024302 | Lysmd1 | 1.29 | 8.36E-04 | DOWN | 1.58 | 9.37E-03 | DOWN |
| NM_153470    | Lzts1  | 1.72 | 3.80E-02 | DOWN | 1.75 | 3.22E-02 | DOWN |
| NM_001106594 | Mad2l1 | 1.40 | 2.55E-02 | DOWN | 1.41 | 1.45E-02 | DOWN |
| NM_001012106 | Mad2l2 | 1.42 | 4.06E-02 | DOWN | 1.42 | 2.98E-02 | DOWN |
| NM_001008319 | Maea   | 1.29 | 1.92E-02 | DOWN | 1.40 | 3.30E-02 | DOWN |
| NM_001013250 | Mageh1 | 1.53 | 6.22E-04 | DOWN | 1.43 | 7.80E-03 | DOWN |
| NM_139256    | Man2c1 | 1.34 | 8.16E-03 | DOWN | 1.37 | 3.99E-02 | DOWN |
| NM_001173380 | Manbal | 1.33 | 2.73E-02 | DOWN | 1.75 | 1.60E-02 | DOWN |
| NM_133283    | Map2k2 | 1.34 | 4.39E-02 | DOWN | 1.90 | 3.07E-03 | DOWN |
| NM_133407    | Map4k3 | 1.29 | 1.12E-02 | DOWN | 1.45 | 3.03E-02 | DOWN |
| NM_001135716 | Map9   | 1.49 | 2.46E-02 | DOWN | 1.44 | 4.32E-02 | DOWN |
| NM_001109532 | Mapk11 | 1.23 | 4.41E-02 | DOWN | 1.33 | 5.18E-03 | DOWN |
| NM_017322    | Mapk9  | 1.48 | 1.82E-02 | DOWN | 2.24 | 1.37E-02 | DOWN |
| NM_133421.1  | Marf1  | 1.30 | 2.20E-02 | DOWN | 1.98 | 6.37E-03 | DOWN |
| NM_001134796 | Mast3  | 1.77 | 1.30E-03 | DOWN | 1.64 | 4.10E-02 | DOWN |
| NM_001109056 | Mb21d2 | 1.37 | 3.13E-02 | DOWN | 1.60 | 3.02E-02 | DOWN |
| NM_001170566 | Mbd6   | 1.41 | 3.02E-03 | DOWN | 1.53 | 1.61E-02 | DOWN |
| NM_012599    | Mbl1   | 1.41 | 4.16E-03 | DOWN | 2.73 | 4.91E-02 | DOWN |
| NM_001109120 | Mboat1 | 1.53 | 3.47E-02 | DOWN | 1.95 | 7.12E-03 | DOWN |
| NM_001012177 | Mccc2  | 1.32 | 8.75E-03 | DOWN | 1.69 | 1.90E-02 | DOWN |
| NM_001106341 | Mcee   | 1.33 | 2.26E-02 | DOWN | 2.02 | 1.57E-03 | DOWN |
| NM_139253    | Mcfd2  | 1.37 | 6.04E-03 | DOWN | 2.25 | 3.94E-02 | DOWN |
| NM_019323    | Mcpt9  | 1.39 | 4.35E-02 | DOWN | 1.69 | 1.86E-03 | DOWN |
| NM_001017459 | Mdm1   | 1.54 | 1.36E-05 | DOWN | 1.46 | 5.72E-03 | DOWN |

|              |           |      |          |      |      |          |      |
|--------------|-----------|------|----------|------|------|----------|------|
| NM_001106039 | Mdp1      | 1.69 | 3.00E-03 | DOWN | 1.54 | 2.06E-02 | DOWN |
| NM_001044286 | Mea1      | 1.39 | 2.11E-02 | DOWN | 1.58 | 2.02E-02 | DOWN |
| NM_022673    | Mecp2     | 1.34 | 6.21E-04 | DOWN | 1.43 | 3.54E-02 | DOWN |
| NM_001106097 | Med10     | 1.34 | 1.96E-03 | DOWN | 1.41 | 2.48E-02 | DOWN |
| NM_001105799 | Med11     | 1.39 | 2.28E-03 | DOWN | 1.40 | 4.78E-02 | DOWN |
| NM_001107217 | Med28     | 1.32 | 5.26E-03 | DOWN | 1.65 | 1.18E-02 | DOWN |
| NM_001106237 | Med29     | 1.52 | 1.66E-02 | DOWN | 1.67 | 4.82E-03 | DOWN |
| NM_001130539 | Med30     | 1.34 | 7.67E-03 | DOWN | 1.45 | 1.08E-02 | DOWN |
| NM_001024256 | Med4      | 1.67 | 3.77E-03 | DOWN | 1.84 | 1.30E-02 | DOWN |
| NM_001108673 | Med8      | 1.29 | 4.20E-02 | DOWN | 1.80 | 1.92E-03 | DOWN |
| NM_001017507 | Mef2b     | 1.15 | 1.65E-02 | DOWN | 1.15 | 2.50E-02 | DOWN |
| NM_001107940 | Megf9     | 1.63 | 2.17E-02 | DOWN | 1.61 | 2.79E-02 | DOWN |
| NM_001115033 | Meiob     | 1.43 | 4.96E-02 | DOWN | 2.87 | 1.26E-04 | DOWN |
| NM_001134702 | Meis1     | 1.39 | 1.81E-03 | DOWN | 1.66 | 9.91E-03 | DOWN |
| NM_017149    | Meox2     | 1.57 | 3.64E-02 | DOWN | 2.01 | 1.81E-02 | DOWN |
| NM_001025668 | Mettl18   | 1.23 | 2.13E-02 | DOWN | 1.89 | 1.78E-02 | DOWN |
| NM_001271284 | Mff       | 1.26 | 3.81E-02 | DOWN | 2.08 | 2.31E-02 | DOWN |
| NM_001106911 | Mfsd6     | 1.32 | 3.66E-02 | DOWN | 2.29 | 1.07E-02 | DOWN |
| NM_001108215 | Mfsd9     | 1.50 | 6.15E-03 | DOWN | 2.18 | 2.49E-03 | DOWN |
| NM_030861    | Mgat1     | 1.36 | 1.29E-02 | DOWN | 1.76 | 4.75E-02 | DOWN |
| NM_001024895 | MGC114492 | 1.15 | 3.74E-02 | DOWN | 1.73 | 2.37E-02 | UP   |
| NM_001024905 | MGC116121 | 1.17 | 1.33E-02 | DOWN | 1.47 | 2.89E-02 | DOWN |
| NM_001077231 | MGC125239 | 1.24 | 1.72E-02 | DOWN | 2.09 | 1.37E-03 | DOWN |
| NR_027366    | MGC94282  | 1.66 | 1.59E-02 | DOWN | 1.58 | 3.00E-02 | DOWN |
| NM_001004251 | MGC94335  | 1.29 | 1.96E-02 | DOWN | 1.68 | 8.50E-03 | DOWN |
| NM_001005532 | MGC95210  | 1.21 | 4.84E-02 | DOWN | 1.60 | 1.62E-02 | DOWN |
| NM_001009655 | Mgme1     | 1.42 | 8.81E-03 | DOWN | 1.38 | 2.14E-02 | DOWN |
| NM_001106430 | Mgst2     | 1.26 | 2.17E-02 | DOWN | 1.85 | 4.84E-02 | DOWN |
| NM_134399    | Mk1       | 1.61 | 8.79E-03 | DOWN | 1.93 | 3.60E-02 | DOWN |
| NM_001008353 | Mkks      | 1.37 | 4.87E-03 | DOWN | 1.72 | 1.89E-03 | DOWN |
| NM_001034917 | Mks1      | 1.60 | 1.25E-02 | DOWN | 1.63 | 1.50E-02 | DOWN |
| NM_001108105 | Mlc1      | 1.52 | 4.53E-02 | DOWN | 2.65 | 2.48E-02 | DOWN |
| NM_001107889 | Mlf2      | 1.29 | 2.64E-02 | DOWN | 1.61 | 1.05E-02 | DOWN |
| NM_133552    | Mlxipl    | 1.23 | 4.94E-02 | DOWN | 2.42 | 3.42E-02 | DOWN |
| NM_001106174 | Mmaa      | 1.44 | 8.63E-03 | DOWN | 1.87 | 1.50E-03 | DOWN |
| NM_080776    | Mmp16     | 1.23 | 2.72E-02 | DOWN | 1.30 | 1.29E-02 | DOWN |
| NM_001107159 | Mmp19     | 1.31 | 3.66E-02 | DOWN | 2.36 | 1.77E-02 | DOWN |
| NM_001271596 | Mms19l    | 1.48 | 4.68E-03 | DOWN | 1.36 | 3.70E-02 | DOWN |
| NM_001106881 | Mocs1     | 1.70 | 2.09E-03 | DOWN | 1.83 | 1.06E-02 | DOWN |
| NM_001011999 | Morf4l1   | 1.28 | 3.06E-02 | DOWN | 1.66 | 2.06E-02 | DOWN |
| NM_001025629 | Mospd3    | 1.53 | 3.54E-03 | DOWN | 2.02 | 2.34E-02 | DOWN |

|                |         |      |          |      |      |          |      |
|----------------|---------|------|----------|------|------|----------|------|
| NM_133561      | Mpc1    | 1.37 | 4.10E-02 | DOWN | 2.17 | 1.95E-03 | DOWN |
| NM_001108435   | Mppe1   | 1.40 | 7.17E-03 | DOWN | 1.89 | 1.11E-02 | DOWN |
| NM_053814      | Mprip   | 1.38 | 9.87E-03 | DOWN | 1.49 | 3.11E-02 | DOWN |
| NM_138843      | Mpst    | 1.69 | 1.32E-03 | DOWN | 1.90 | 7.43E-03 | DOWN |
| NM_001098240   | Mpv171  | 1.35 | 4.51E-02 | DOWN | 1.91 | 6.56E-03 | DOWN |
| NM_001192002   | Mreg    | 1.71 | 3.33E-02 | DOWN | 2.07 | 8.74E-03 | DOWN |
| NM_001010947   | Mri1    | 1.33 | 4.91E-02 | DOWN | 1.54 | 2.52E-02 | DOWN |
| NM_001105997.1 | Mrpl1   | 1.43 | 8.58E-03 | DOWN | 1.66 | 5.30E-04 | DOWN |
| NM_001109620   | Mrpl10  | 1.34 | 1.60E-02 | DOWN | 1.78 | 3.97E-03 | DOWN |
| NM_001006973   | mrpl11  | 1.29 | 3.76E-02 | DOWN | 1.79 | 5.07E-03 | DOWN |
| NM_001271131   | Mrpl14  | 1.56 | 3.70E-03 | DOWN | 1.61 | 1.78E-02 | DOWN |
| NM_001106633   | Mrpl15  | 1.32 | 8.78E-03 | DOWN | 1.71 | 4.41E-03 | DOWN |
| NM_001009647   | Mrpl16  | 1.30 | 2.40E-02 | DOWN | 1.65 | 7.25E-03 | DOWN |
| NM_001029898   | Mrpl19  | 1.49 | 3.64E-03 | DOWN | 1.67 | 1.02E-02 | DOWN |
| NM_001034136   | Mrpl2   | 1.41 | 4.79E-03 | DOWN | 1.59 | 1.06E-02 | DOWN |
| NM_001109428   | Mrpl20  | 1.43 | 2.89E-02 | DOWN | 2.12 | 1.91E-03 | DOWN |
| NM_022529      | Mrpl23  | 1.41 | 1.54E-02 | DOWN | 1.48 | 2.93E-02 | DOWN |
| NM_001106596   | Mrpl35  | 1.30 | 4.46E-02 | DOWN | 1.62 | 1.07E-02 | DOWN |
| NM_001108879   | Mrpl36  | 1.31 | 4.35E-02 | DOWN | 1.73 | 7.63E-03 | DOWN |
| NM_001004235   | Mrpl37  | 1.29 | 1.76E-02 | DOWN | 1.61 | 1.04E-02 | DOWN |
| NM_001108754   | Mrpl4   | 1.30 | 3.07E-02 | DOWN | 1.69 | 2.17E-02 | DOWN |
| NM_001013426   | Mrpl41  | 1.36 | 2.11E-02 | DOWN | 1.54 | 4.20E-02 | DOWN |
| NM_001013068   | Mrpl46  | 1.31 | 4.00E-02 | DOWN | 1.66 | 9.46E-03 | DOWN |
| NM_001047883   | Mrpl49  | 1.49 | 2.34E-02 | DOWN | 1.42 | 4.31E-02 | DOWN |
| NM_001108665   | Mrpl50  | 1.36 | 2.90E-02 | DOWN | 1.77 | 2.73E-03 | DOWN |
| NM_001106621   | Mrpl51  | 1.32 | 1.51E-02 | DOWN | 1.43 | 2.95E-02 | DOWN |
| NM_001108635   | Mrpl53  | 1.38 | 1.87E-02 | DOWN | 1.60 | 9.17E-03 | DOWN |
| NM_001109148   | Mrps11  | 1.33 | 3.91E-02 | DOWN | 1.76 | 4.41E-03 | DOWN |
| NM_001106239   | Mrps12  | 1.38 | 1.69E-02 | DOWN | 1.86 | 5.10E-03 | DOWN |
| NM_001109518   | Mrps16  | 1.52 | 8.44E-03 | DOWN | 1.71 | 5.77E-03 | DOWN |
| NM_001105923   | Mrps17  | 1.28 | 2.29E-02 | DOWN | 1.78 | 4.78E-03 | DOWN |
| NM_198756      | Mrps18a | 1.24 | 4.53E-02 | DOWN | 1.55 | 1.42E-02 | DOWN |
| NM_212534      | Mrps18b | 1.42 | 2.83E-02 | DOWN | 1.52 | 3.76E-02 | DOWN |
| NM_001077530   | Mrps22  | 1.43 | 6.80E-03 | DOWN | 1.55 | 2.42E-02 | DOWN |
| NM_001108289   | Mrps23  | 1.32 | 3.41E-02 | DOWN | 1.87 | 3.44E-03 | DOWN |
| NM_001077659   | Mrps24  | 1.32 | 1.90E-02 | DOWN | 1.54 | 2.33E-02 | DOWN |
| NM_001013206   | Mrps26  | 1.36 | 3.22E-02 | DOWN | 1.78 | 1.14E-02 | DOWN |
| NM_001047909   | Mrps28  | 1.27 | 3.57E-02 | DOWN | 1.44 | 9.21E-03 | DOWN |
| NM_001106412   | Mrps30  | 1.45 | 4.29E-04 | DOWN | 1.50 | 8.24E-03 | DOWN |
| NM_001106091   | Mrps31  | 1.40 | 2.41E-02 | DOWN | 1.61 | 1.13E-02 | DOWN |
| NM_001008354   | Mrrf    | 1.33 | 1.24E-02 | DOWN | 1.45 | 3.51E-02 | DOWN |

|              |           |      |          |      |      |          |      |
|--------------|-----------|------|----------|------|------|----------|------|
| NM_031058    | Msh2      | 1.45 | 2.55E-02 | DOWN | 1.49 | 3.84E-02 | DOWN |
| NM_001031660 | Msrb2     | 1.59 | 1.53E-04 | DOWN | 2.02 | 2.51E-02 | DOWN |
| NM_001100740 | Mta2      | 1.28 | 5.00E-02 | DOWN | 1.60 | 2.36E-02 | DOWN |
| NM_001009697 | Mtfmt     | 1.43 | 3.80E-03 | DOWN | 1.72 | 2.97E-03 | DOWN |
| NM_001009349 | Mthfs     | 1.42 | 5.33E-03 | DOWN | 2.14 | 2.23E-02 | DOWN |
| NM_001004254 | Mtif2     | 1.37 | 2.65E-02 | DOWN | 1.63 | 1.79E-02 | DOWN |
| NM_001115041 | Mtif3     | 1.32 | 1.75E-02 | DOWN | 1.59 | 2.11E-02 | DOWN |
| NM_001013047 | Mtm1      | 1.42 | 4.43E-03 | DOWN | 1.40 | 3.84E-02 | DOWN |
| NM_001105827 | Mtmr4     | 1.38 | 1.91E-02 | DOWN | 1.98 | 9.14E-03 | DOWN |
| NM_001100667 | Mtx1      | 1.36 | 9.72E-03 | DOWN | 1.68 | 4.22E-03 | DOWN |
| NM_199375    | Mvb12a    | 1.40 | 9.43E-03 | DOWN | 1.75 | 1.32E-02 | DOWN |
| NM_183332    | Myadm     | 1.42 | 2.90E-02 | DOWN | 1.43 | 3.96E-02 | UP   |
| NM_017343    | Myl12b    | 1.34 | 2.49E-02 | DOWN | 1.73 | 1.30E-02 | DOWN |
| NM_001191592 | N6amt1    | 1.35 | 1.23E-02 | DOWN | 1.69 | 5.85E-04 | DOWN |
| NM_001105794 | Naa38     | 1.30 | 4.84E-02 | DOWN | 1.79 | 7.54E-03 | DOWN |
| NM_001014216 | Nabp1     | 1.56 | 1.05E-02 | DOWN | 1.84 | 6.45E-03 | DOWN |
| NM_001244819 | Nabp2     | 1.45 | 2.94E-02 | DOWN | 1.52 | 3.64E-02 | DOWN |
| NM_001109678 | Nadk      | 1.22 | 4.70E-02 | DOWN | 1.85 | 3.57E-02 | DOWN |
| NM_001044252 | Nadk2     | 1.22 | 4.43E-02 | DOWN | 2.38 | 1.65E-02 | DOWN |
| NM_181480    | Nadsyn1   | 1.45 | 1.72E-02 | DOWN | 1.82 | 8.85E-03 | DOWN |
| NM_001012120 | Naga      | 1.40 | 3.45E-03 | DOWN | 1.80 | 2.81E-02 | DOWN |
| NM_001107053 | Nags      | 1.56 | 1.36E-02 | DOWN | 2.49 | 4.70E-02 | DOWN |
| NM_207609    | Naprt1    | 1.45 | 8.00E-03 | DOWN | 1.81 | 4.36E-02 | DOWN |
| NM_001039207 | Narf      | 1.38 | 3.63E-02 | DOWN | 1.73 | 7.73E-03 | DOWN |
| NM_001037316 | Nat1      | 1.27 | 2.25E-02 | DOWN | 2.79 | 2.64E-03 | DOWN |
| NM_022635    | Nat8      | 3.46 | 1.12E-02 | UP   | 4.45 | 2.33E-03 | DOWN |
| NM_001014082 | Ncln      | 1.32 | 4.41E-02 | DOWN | 1.69 | 3.42E-02 | DOWN |
| NM_001107818 | Ndor1     | 1.53 | 1.99E-02 | DOWN | 1.77 | 1.33E-02 | DOWN |
| NM_001270863 | Ndrg2     | 1.42 | 4.53E-03 | DOWN | 1.80 | 1.93E-02 | DOWN |
| NM_182671    | Ndufa10l1 | 1.37 | 6.90E-03 | DOWN | 1.59 | 4.11E-03 | DOWN |
| NM_212517    | Ndufa11   | 1.30 | 4.70E-02 | DOWN | 1.62 | 1.82E-02 | DOWN |
| NM_001106781 | Ndufa12   | 1.31 | 3.13E-02 | DOWN | 1.51 | 2.20E-02 | DOWN |
| NM_001100752 | Ndufa9    | 1.36 | 5.32E-03 | DOWN | 1.56 | 3.89E-02 | DOWN |
| NM_001106500 | Ndufaf1   | 1.32 | 3.18E-02 | DOWN | 1.53 | 1.22E-02 | DOWN |
| NM_001033971 | Ndufaf3   | 1.89 | 2.29E-02 | DOWN | 1.86 | 8.04E-03 | DOWN |
| NM_001008318 | Ndufaf7   | 1.39 | 1.68E-02 | DOWN | 1.45 | 1.65E-02 | DOWN |
| NM_001109443 | Ndufb10   | 1.48 | 6.92E-03 | DOWN | 1.72 | 3.42E-02 | DOWN |
| NM_001106756 | Ndufb11   | 1.34 | 2.99E-02 | DOWN | 1.65 | 1.85E-02 | DOWN |
| NM_001108624 | Ndufb2    | 1.40 | 3.73E-02 | DOWN | 1.55 | 3.53E-02 | DOWN |
| NM_001106912 | Ndufb3    | 1.40 | 3.13E-02 | DOWN | 1.83 | 1.01E-02 | DOWN |
| NM_001106646 | Ndufb6    | 1.33 | 1.66E-02 | DOWN | 1.78 | 8.23E-03 | DOWN |

|              |          |      |          |      |      |          |      |
|--------------|----------|------|----------|------|------|----------|------|
| NM_001106322 | Ndufs8   | 1.46 | 1.15E-02 | DOWN | 1.52 | 4.20E-02 | DOWN |
| NM_001006972 | Ndufv1   | 1.32 | 2.43E-02 | DOWN | 1.55 | 3.89E-02 | DOWN |
| NM_031064    | Ndufv2   | 1.28 | 3.07E-02 | DOWN | 1.53 | 3.17E-02 | DOWN |
| NM_022607    | Ndufv3   | 1.50 | 3.47E-02 | DOWN | 1.66 | 2.83E-02 | DOWN |
| NM_199096    | Necap2   | 1.27 | 4.56E-02 | DOWN | 1.49 | 3.43E-02 | DOWN |
| NM_138878    | Nedd8    | 1.30 | 3.59E-02 | DOWN | 1.67 | 1.43E-02 | DOWN |
| NM_001025754 | Neill    | 1.34 | 3.17E-02 | DOWN | 1.68 | 2.32E-03 | DOWN |
| NM_053462    | Nfs1     | 1.20 | 2.27E-02 | DOWN | 1.72 | 3.56E-02 | DOWN |
| NM_012866    | Nfyc     | 1.32 | 7.62E-03 | DOWN | 1.43 | 2.81E-02 | DOWN |
| NM_001100730 | Nipsnap1 | 1.43 | 3.87E-03 | DOWN | 2.66 | 3.47E-02 | DOWN |
| NM_182668    | Nit1     | 1.53 | 6.61E-03 | DOWN | 2.55 | 4.79E-03 | DOWN |
| NM_001034126 | Nit2     | 1.48 | 6.59E-03 | DOWN | 2.48 | 1.08E-02 | DOWN |
| NM_001034148 | Nmi      | 1.57 | 4.19E-02 | DOWN | 1.98 | 1.58E-02 | DOWN |
| NM_001037556 | Nmnat1   | 1.51 | 1.24E-02 | DOWN | 1.86 | 1.27E-03 | DOWN |
| NM_001126100 | Nop10    | 1.34 | 4.11E-02 | DOWN | 1.99 | 4.42E-03 | DOWN |
| NM_001106260 | Nosip    | 1.42 | 1.70E-02 | DOWN | 1.67 | 1.78E-02 | DOWN |
| NM_001013975 | Notum    | 2.01 | 2.91E-02 | DOWN | 3.30 | 2.60E-02 | DOWN |
| NM_153624    | Npc1     | 1.68 | 1.90E-02 | DOWN | 1.92 | 4.32E-02 | DOWN |
| NM_001191882 | Nphp3    | 1.44 | 2.02E-02 | DOWN | 1.45 | 1.40E-02 | DOWN |
| NM_001004214 | Nqo2     | 1.61 | 3.10E-03 | DOWN | 1.98 | 3.77E-02 | DOWN |
| NM_031626    | Nr1h2    | 1.34 | 1.70E-02 | DOWN | 1.50 | 4.52E-02 | DOWN |
| NM_031627    | Nr1h3    | 1.46 | 2.39E-02 | DOWN | 2.44 | 2.47E-02 | DOWN |
| NM_080778    | Nr2f2    | 1.61 | 1.07E-02 | DOWN | 2.03 | 3.43E-03 | DOWN |
| NM_139113    | Nr2f6    | 1.49 | 6.94E-03 | DOWN | 1.97 | 1.32E-02 | DOWN |
| NM_022186    | Nrbf2    | 1.41 | 1.13E-02 | UP   | 1.80 | 1.71E-02 | DOWN |
| NM_001034997 | Nrbp1    | 1.32 | 4.51E-02 | DOWN | 1.50 | 2.77E-02 | DOWN |
| NM_001191109 | Nrg4     | 2.39 | 1.40E-02 | UP   | 1.89 | 1.95E-02 | DOWN |
| NM_001135006 | Nrn1l    | 1.13 | 3.52E-03 | DOWN | 1.16 | 6.55E-04 | DOWN |
| NM_207607    | Ns5atp4  | 1.49 | 4.10E-02 | DOWN | 1.54 | 4.33E-02 | DOWN |
| NM_031981    | Nsfl1c   | 1.32 | 4.37E-02 | DOWN | 1.51 | 4.04E-02 | DOWN |
| NM_181389    | Nsmaf    | 1.19 | 3.78E-02 | DOWN | 1.60 | 4.44E-03 | DOWN |
| NM_001039611 | Nsmce1   | 1.34 | 3.70E-02 | DOWN | 1.56 | 2.08E-02 | DOWN |
| NM_001024876 | Nsmce2   | 1.34 | 2.65E-02 | DOWN | 1.67 | 1.11E-02 | DOWN |
| NR_073057    | Nsmf     | 1.46 | 1.78E-02 | DOWN | 1.41 | 1.79E-02 | DOWN |
| NM_001107862 | Nt5c3a   | 1.39 | 2.16E-02 | DOWN | 1.57 | 1.08E-02 | DOWN |
| NM_001106393 | Nt5dc1   | 1.40 | 4.03E-02 | DOWN | 2.34 | 4.49E-03 | DOWN |
| NM_001025124 | Ntan1    | 1.33 | 1.41E-02 | DOWN | 1.93 | 1.14E-03 | DOWN |
| NM_001105728 | Nthl1    | 1.40 | 1.67E-02 | DOWN | 1.61 | 2.21E-02 | DOWN |
| NM_001011891 | Nubp2    | 1.48 | 2.90E-02 | DOWN | 1.67 | 1.29E-02 | DOWN |
| NM_001185025 | Nubpl    | 1.34 | 2.24E-03 | DOWN | 1.55 | 1.38E-02 | DOWN |
| NM_057120    | Nudt1    | 1.21 | 4.77E-02 | DOWN | 1.57 | 7.04E-03 | DOWN |

|              |          |      |          |      |      |          |      |
|--------------|----------|------|----------|------|------|----------|------|
| NM_001106760 | Nudt14   | 1.45 | 1.30E-02 | DOWN | 1.48 | 4.23E-02 | DOWN |
| NM_001100732 | Nudt18   | 1.59 | 2.68E-03 | DOWN | 1.52 | 2.48E-02 | DOWN |
| NM_199090    | Nudt22   | 1.76 | 5.01E-03 | DOWN | 1.53 | 1.56E-02 | DOWN |
| NM_001007733 | Nudt5    | 1.31 | 4.99E-02 | DOWN | 1.58 | 3.19E-02 | DOWN |
| NM_001168559 | Nup214   | 1.38 | 2.30E-02 | DOWN | 1.48 | 3.87E-02 | DOWN |
| NM_001134570 | Nupr1l   | 1.48 | 1.47E-02 | DOWN | 1.61 | 6.03E-03 | DOWN |
| NM_022521    | Oat      | 2.09 | 4.95E-03 | DOWN | 2.17 | 1.91E-02 | DOWN |
| NM_001013874 | Ociad1   | 1.25 | 4.96E-02 | DOWN | 1.64 | 1.21E-02 | DOWN |
| NM_001271181 | Ociad2   | 1.52 | 3.39E-02 | DOWN | 1.87 | 2.36E-02 | DOWN |
| NM_001108256 | Ocrl     | 1.47 | 1.09E-03 | DOWN | 1.60 | 7.81E-03 | DOWN |
| NM_001106961 | Ofd1     | 1.35 | 1.97E-02 | DOWN | 1.60 | 1.18E-02 | DOWN |
| NM_030870    | Ogg1     | 1.29 | 3.75E-02 | DOWN | 1.49 | 2.58E-02 | DOWN |
| NM_001000081 | Olr1584  | 1.15 | 2.29E-02 | DOWN | 1.17 | 6.92E-03 | DOWN |
| NM_001106669 | Oma1     | 1.42 | 5.76E-03 | DOWN | 1.56 | 3.56E-03 | DOWN |
| NM_199092    | Orc4     | 1.32 | 3.35E-02 | DOWN | 1.69 | 1.89E-03 | DOWN |
| NM_001014186 | Orc5     | 1.28 | 2.41E-02 | DOWN | 1.63 | 7.97E-03 | DOWN |
| NM_001105940 | Ormdl2   | 1.29 | 1.37E-02 | DOWN | 2.11 | 2.20E-02 | DOWN |
| NM_172023    | Osbp1a   | 1.32 | 5.93E-03 | DOWN | 1.49 | 1.30E-02 | DOWN |
| NM_001107044 | Osbp17   | 1.67 | 1.33E-04 | DOWN | 1.37 | 4.73E-02 | DOWN |
| NM_001005384 | Osmr     | 1.43 | 3.82E-02 | UP   | 1.40 | 2.61E-02 | UP   |
| NM_001106332 | Otub1    | 1.33 | 4.18E-02 | DOWN | 1.61 | 1.23E-02 | DOWN |
| NM_001197332 | Oxr1     | 1.26 | 3.21E-02 | DOWN | 1.56 | 1.67E-02 | DOWN |
| NM_001100508 | Oxsm     | 1.35 | 6.28E-03 | DOWN | 1.73 | 7.34E-04 | DOWN |
| NM_001135008 | Pabpn1   | 1.37 | 2.68E-02 | DOWN | 1.73 | 9.32E-03 | DOWN |
| NM_001024898 | Paf1     | 1.34 | 3.55E-02 | DOWN | 1.61 | 1.05E-02 | DOWN |
| NM_001008862 | Pan2     | 1.20 | 3.21E-02 | DOWN | 1.80 | 8.18E-03 | DOWN |
| NM_001106375 | Papss2   | 1.61 | 4.81E-04 | DOWN | 2.90 | 8.01E-03 | DOWN |
| NM_001277250 | Park7    | 1.36 | 2.33E-02 | DOWN | 1.70 | 1.21E-02 | DOWN |
| NM_013063    | Parp1    | 1.28 | 1.85E-02 | DOWN | 1.43 | 4.47E-02 | DOWN |
| NM_001106030 | Parp2    | 1.30 | 9.39E-03 | DOWN | 1.58 | 8.44E-03 | DOWN |
| NM_001014064 | Pars2    | 1.34 | 2.12E-02 | DOWN | 1.73 | 8.81E-03 | DOWN |
| NM_001277215 | Patz1    | 1.64 | 3.52E-02 | DOWN | 1.63 | 1.12E-02 | DOWN |
| NM_019125    | Pbsn     | 1.27 | 1.52E-02 | DOWN | 1.26 | 9.47E-03 | DOWN |
| NM_001100681 | Pbx1     | 1.50 | 3.67E-03 | DOWN | 1.80 | 3.80E-03 | DOWN |
| NM_019330    | Pcca     | 1.35 | 1.86E-02 | DOWN | 1.71 | 2.50E-02 | DOWN |
| NM_017030    | Pccb     | 1.34 | 5.71E-03 | DOWN | 1.67 | 1.43E-02 | DOWN |
| NM_001037153 | Pcdhga11 | 1.09 | 4.73E-02 | DOWN | 1.10 | 1.68E-02 | DOWN |
| NM_001039454 | Pcd1b    | 1.34 | 2.77E-02 | DOWN | 1.83 | 1.18E-02 | DOWN |
| NM_001108377 | Pck2     | 1.44 | 3.26E-02 | DOWN | 1.97 | 1.89E-03 | DOWN |
| NM_053823    | Pcsk5    | 1.29 | 8.98E-03 | DOWN | 1.84 | 2.02E-04 | DOWN |
| NM_001009542 | Pdcd10   | 1.25 | 3.81E-02 | DOWN | 1.68 | 3.42E-03 | DOWN |

|              |         |      |          |      |      |          |      |
|--------------|---------|------|----------|------|------|----------|------|
| NM_031525    | Pdgfrb  | 1.62 | 2.19E-05 | DOWN | 1.52 | 3.32E-02 | DOWN |
| NM_017319    | Pdia3   | 1.32 | 2.81E-02 | DOWN | 2.06 | 3.33E-02 | DOWN |
| NM_017062    | Pdlim4  | 1.43 | 3.81E-03 | DOWN | 2.28 | 6.35E-03 | UP   |
| NM_001107430 | Pdpr    | 1.75 | 5.10E-03 | DOWN | 1.63 | 8.47E-03 | DOWN |
| NM_001014249 | Pdss2   | 1.31 | 3.26E-02 | DOWN | 1.56 | 3.68E-02 | DOWN |
| NM_001106945 | Pdzd11  | 1.29 | 4.55E-02 | DOWN | 1.74 | 8.59E-03 | DOWN |
| NM_031712    | Pdzk1   | 1.74 | 9.02E-04 | DOWN | 2.95 | 1.07E-02 | DOWN |
| NM_001109405 | Pex10   | 1.36 | 2.94E-02 | DOWN | 1.54 | 2.28E-02 | DOWN |
| NM_001105902 | Pex11g  | 1.71 | 1.50E-03 | DOWN | 1.99 | 1.13E-03 | DOWN |
| NM_001012088 | Pex16   | 1.35 | 2.75E-02 | DOWN | 2.23 | 1.07E-02 | DOWN |
| NM_017234    | Pex2    | 1.44 | 4.40E-03 | DOWN | 1.75 | 7.04E-03 | DOWN |
| NM_001170584 | Pex5    | 1.39 | 4.58E-03 | DOWN | 2.18 | 5.63E-03 | DOWN |
| NM_212506    | Pfdn6   | 1.40 | 4.49E-02 | DOWN | 2.00 | 2.47E-03 | DOWN |
| NM_022511    | Pfn1    | 1.36 | 3.37E-02 | DOWN | 1.61 | 2.42E-02 | DOWN |
| NM_053895    | Pgap2   | 1.40 | 3.55E-02 | DOWN | 1.51 | 4.66E-02 | DOWN |
| NM_001143895 | Pgap3   | 1.43 | 9.26E-03 | DOWN | 1.53 | 3.69E-02 | DOWN |
| NM_001106066 | Pgls    | 1.36 | 3.31E-02 | DOWN | 1.67 | 3.51E-02 | DOWN |
| NM_001013035 | Phb2    | 1.37 | 9.64E-03 | DOWN | 1.68 | 1.42E-02 | DOWN |
| NM_001110492 | Phf14   | 1.22 | 4.11E-02 | DOWN | 1.53 | 2.30E-02 | DOWN |
| NM_001128196 | Phykpl  | 1.35 | 2.01E-02 | DOWN | 1.91 | 3.77E-02 | DOWN |
| NM_053337    | Pias2   | 1.22 | 7.75E-03 | DOWN | 1.73 | 5.38E-04 | DOWN |
| NM_001108714 | Pigh    | 1.29 | 3.74E-02 | DOWN | 1.71 | 1.33E-02 | DOWN |
| NM_001011953 | Pigk    | 1.34 | 3.70E-03 | DOWN | 1.79 | 6.16E-03 | DOWN |
| NM_001099758 | Pigp    | 1.38 | 1.37E-02 | DOWN | 1.44 | 2.24E-02 | DOWN |
| NM_001010966 | Pigv    | 1.36 | 2.24E-02 | DOWN | 1.44 | 2.92E-03 | DOWN |
| NM_001024370 | Pigy    | 1.31 | 3.29E-02 | DOWN | 1.63 | 6.76E-03 | DOWN |
| NM_001109525 | Pigz    | 1.32 | 2.99E-02 | DOWN | 1.61 | 4.95E-03 | DOWN |
| NM_022185    | Pik3r2  | 1.34 | 6.78E-03 | DOWN | 1.47 | 3.39E-02 | DOWN |
| NM_001033970 | Pip5k1c | 1.29 | 2.16E-02 | DOWN | 1.62 | 2.51E-02 | DOWN |
| NM_001012009 | Pipox   | 1.36 | 1.62E-02 | DOWN | 2.99 | 4.40E-02 | DOWN |
| NM_001108007 | Pkdcc   | 1.61 | 1.63E-02 | DOWN | 1.94 | 3.07E-02 | DOWN |
| NM_001107764 | Pla2g4b | 1.59 | 1.37E-03 | DOWN | 1.53 | 1.88E-02 | DOWN |
| NM_001013927 | Plbd1   | 1.36 | 3.38E-02 | DOWN | 1.68 | 3.16E-02 | DOWN |
| NM_030992    | Pld1    | 1.53 | 8.38E-03 | DOWN | 1.76 | 2.77E-02 | DOWN |
| NM_001108072 | Plekhj1 | 1.34 | 2.62E-02 | DOWN | 1.62 | 1.63E-02 | DOWN |
| NM_001134613 | Plekhs1 | 1.53 | 2.54E-03 | DOWN | 1.71 | 1.86E-02 | DOWN |
| NM_001106347 | Plgrkt  | 1.63 | 1.55E-04 | DOWN | 1.74 | 1.09E-04 | DOWN |
| NM_001007144 | Plin2   | 1.74 | 1.04E-02 | UP   | 2.21 | 1.81E-02 | DOWN |
| NM_001109068 | Pm20d1  | 1.81 | 1.18E-04 | DOWN | 2.20 | 4.49E-02 | DOWN |
| NM_001106973 | Pmm2    | 1.51 | 6.09E-03 | DOWN | 1.57 | 1.32E-02 | DOWN |
| NM_022395    | Pmpcb   | 1.37 | 6.00E-03 | DOWN | 1.53 | 1.61E-02 | DOWN |

|              |          |      |          |      |      |          |      |
|--------------|----------|------|----------|------|------|----------|------|
| NM_001025274 | Pnistr   | 1.27 | 4.38E-02 | DOWN | 1.63 | 1.09E-02 | DOWN |
| NM_001134751 | Pnkd     | 2.24 | 1.96E-04 | DOWN | 1.45 | 4.71E-02 | DOWN |
| NM_001103360 | Pnrc2    | 1.28 | 1.66E-02 | DOWN | 1.41 | 3.45E-02 | DOWN |
| NM_001105816 | Poldip2  | 1.31 | 3.29E-02 | DOWN | 1.57 | 2.45E-02 | DOWN |
| NM_001106002 | Polr2b   | 1.32 | 2.90E-03 | DOWN | 1.45 | 1.09E-02 | DOWN |
| NM_031335    | Polr2f   | 1.38 | 1.21E-02 | DOWN | 1.42 | 4.68E-02 | DOWN |
| NM_001105921 | Polr2j   | 1.43 | 1.82E-02 | DOWN | 1.66 | 1.32E-02 | DOWN |
| NM_001109571 | Polr3gl  | 1.26 | 1.24E-03 | DOWN | 1.67 | 4.73E-03 | DOWN |
| NM_001106766 | Polrmt   | 1.33 | 3.86E-02 | DOWN | 1.70 | 1.12E-02 | DOWN |
| NM_001024883 | Pomk     | 1.35 | 9.97E-03 | DOWN | 1.51 | 7.92E-03 | DOWN |
| NM_053406    | Pomt1    | 1.47 | 3.93E-03 | DOWN | 1.66 | 6.94E-03 | DOWN |
| NM_032077    | Pon1     | 1.29 | 1.38E-02 | DOWN | 3.08 | 2.58E-02 | DOWN |
| NM_001130550 | Pop1     | 1.24 | 3.43E-02 | DOWN | 1.49 | 2.41E-02 | DOWN |
| NM_001009642 | Pop4     | 1.57 | 1.02E-02 | DOWN | 1.60 | 1.11E-02 | DOWN |
| NM_001024322 | Pot1     | 1.29 | 1.12E-02 | DOWN | 1.46 | 2.42E-02 | DOWN |
| NM_001105746 | Pou6f1   | 1.44 | 2.95E-02 | DOWN | 1.35 | 4.39E-02 | DOWN |
| NM_001134567 | Pp2d1    | 1.41 | 4.51E-02 | DOWN | 1.63 | 3.31E-03 | DOWN |
| NM_001135871 | Ppa2     | 1.36 | 2.28E-02 | DOWN | 2.14 | 4.36E-03 | DOWN |
| NM_001034854 | Ppapdc2  | 1.40 | 4.75E-03 | DOWN | 1.67 | 4.67E-02 | DOWN |
| NM_001009316 | Ppdpf    | 1.61 | 1.39E-03 | DOWN | 2.19 | 8.13E-03 | DOWN |
| NM_001108745 | Ppfia2   | 1.20 | 2.85E-02 | DOWN | 1.44 | 1.53E-02 | DOWN |
| NM_001100582 | Ppfibp2  | 1.32 | 3.54E-02 | DOWN | 1.62 | 2.37E-02 | DOWN |
| NM_001108992 | Pphln1   | 1.22 | 4.45E-02 | DOWN | 1.73 | 1.63E-03 | DOWN |
| NM_017101    | Ppia     | 1.26 | 4.96E-02 | DOWN | 1.74 | 2.28E-02 | DOWN |
| NM_022536    | Ppib     | 1.42 | 1.02E-02 | DOWN | 1.83 | 4.75E-02 | DOWN |
| NM_001017383 | Ppil2    | 1.38 | 1.60E-02 | DOWN | 1.71 | 5.76E-03 | DOWN |
| NM_175707    | Ppil3    | 1.54 | 5.79E-03 | DOWN | 1.73 | 8.51E-03 | DOWN |
| NM_001270620 | Ppm1b    | 1.59 | 3.04E-02 | DOWN | 1.51 | 8.00E-03 | DOWN |
| NM_001105968 | Ppox     | 1.64 | 3.22E-04 | DOWN | 1.73 | 1.24E-02 | DOWN |
| NM_212542    | Ppp1r11  | 1.54 | 3.43E-03 | DOWN | 1.57 | 1.64E-02 | DOWN |
| NM_001130566 | Ppp1r16a | 1.58 | 1.72E-02 | DOWN | 1.98 | 4.04E-03 | DOWN |
| NM_001271305 | Ppp1r21  | 1.46 | 1.25E-03 | DOWN | 1.47 | 1.39E-02 | DOWN |
| NM_001012072 | Ppp1r3c  | 2.88 | 1.59E-03 | DOWN | 1.82 | 4.51E-02 | DOWN |
| NM_001009825 | Ppp1r7   | 1.31 | 6.69E-03 | DOWN | 1.53 | 5.71E-03 | DOWN |
| NM_001014196 | Ppp2r3c  | 1.25 | 2.12E-02 | DOWN | 1.81 | 1.68E-03 | DOWN |
| NM_001108577 | Ppp2r4   | 1.30 | 4.41E-02 | DOWN | 1.50 | 3.12E-02 | DOWN |
| NM_001107891 | Ppp2r5a  | 1.38 | 1.28E-02 | DOWN | 1.60 | 3.02E-02 | DOWN |
| NM_001135849 | Ppp6r1   | 1.29 | 4.31E-02 | DOWN | 1.44 | 4.62E-02 | DOWN |
| NM_001106281 | Prcp     | 1.70 | 1.60E-02 | DOWN | 2.45 | 6.04E-03 | DOWN |
| NM_022540    | Prdx3    | 1.38 | 3.24E-03 | DOWN | 1.52 | 4.11E-02 | DOWN |
| NM_053512    | Prdx4    | 1.29 | 4.11E-02 | DOWN | 2.13 | 4.01E-02 | DOWN |



|              |         |      |          |      |      |          |      |
|--------------|---------|------|----------|------|------|----------|------|
| NM_001009636 | Prelid1 | 1.40 | 2.01E-02 | DOWN | 2.13 | 2.57E-02 | DOWN |
| NM_001271333 | Prelid2 | 1.73 | 1.19E-03 | UP   | 2.08 | 2.50E-02 | DOWN |
| NM_013010    | Prkag1  | 1.33 | 5.67E-03 | DOWN | 1.48 | 1.81E-02 | DOWN |
| NM_184051    | Prkag2  | 1.50 | 8.33E-03 | DOWN | 1.65 | 2.41E-02 | DOWN |
| NM_001024263 | Prkd3   | 1.47 | 1.70E-02 | DOWN | 2.04 | 4.36E-02 | DOWN |
| NM_001024780 | Prkra   | 1.40 | 2.59E-02 | DOWN | 1.64 | 3.09E-02 | DOWN |
| NM_057131    | Prpsap2 | 1.39 | 1.42E-02 | DOWN | 1.36 | 4.88E-02 | DOWN |
| NM_001108432 | Prr16   | 1.52 | 4.49E-02 | DOWN | 2.70 | 2.97E-02 | DOWN |
| NM_181477    | Prss21  | 1.28 | 3.19E-03 | DOWN | 1.19 | 2.61E-02 | DOWN |
| NM_175765    | Psip1   | 1.36 | 1.96E-02 | DOWN | 1.66 | 6.25E-03 | DOWN |
| NM_017278    | Psmal   | 1.38 | 3.81E-02 | DOWN | 1.72 | 1.25E-02 | DOWN |
| NM_017279    | Psma2   | 1.38 | 4.29E-02 | DOWN | 1.84 | 3.46E-03 | DOWN |
| NM_017285    | Psemb3  | 1.35 | 3.23E-02 | DOWN | 1.54 | 1.32E-02 | DOWN |
| NM_057123    | Psmc1   | 1.32 | 3.08E-02 | DOWN | 1.67 | 1.66E-02 | DOWN |
| NM_001025689 | Psmid14 | 1.42 | 3.41E-02 | DOWN | 1.64 | 1.84E-02 | DOWN |
| NM_130430    | Psmid9  | 1.79 | 2.10E-03 | DOWN | 2.03 | 3.20E-03 | DOWN |
| NM_017264    | Psmel   | 1.30 | 3.08E-02 | DOWN | 1.60 | 4.74E-02 | DOWN |
| NM_001101005 | Psmf1   | 1.31 | 4.22E-02 | DOWN | 2.02 | 3.93E-03 | DOWN |
| NM_001105891 | Psmg1   | 1.37 | 1.91E-02 | DOWN | 2.27 | 5.46E-04 | DOWN |
| NM_001106138 | Psmg2   | 1.28 | 2.97E-02 | DOWN | 1.58 | 7.78E-03 | DOWN |
| NM_001009679 | Psph    | 1.41 | 4.20E-02 | DOWN | 1.63 | 1.67E-02 | DOWN |
| NM_001134718 | Ptcd3   | 1.24 | 3.64E-02 | DOWN | 1.55 | 2.08E-02 | DOWN |
| NM_013081    | Ptk2    | 1.35 | 1.02E-02 | DOWN | 1.48 | 2.09E-02 | DOWN |
| NM_031975    | Ptms    | 1.47 | 8.40E-03 | DOWN | 2.35 | 9.21E-03 | DOWN |
| NM_001106831 | Ptplad1 | 1.50 | 1.50E-02 | DOWN | 2.37 | 6.98E-03 | DOWN |
| NM_001105726 | Ptpmt1  | 1.29 | 4.43E-02 | DOWN | 1.56 | 1.18E-02 | DOWN |
| NM_019249    | Ptprf   | 1.55 | 4.22E-03 | DOWN | 2.64 | 5.87E-03 | DOWN |
| NM_019140    | Ptprs   | 1.29 | 3.58E-02 | DOWN | 1.41 | 3.31E-02 | DOWN |
| NM_001191880 | Puf60   | 1.38 | 2.79E-02 | DOWN | 1.52 | 3.54E-02 | DOWN |
| NM_001011993 | Pycl    | 1.56 | 3.12E-03 | DOWN | 2.11 | 1.61E-03 | DOWN |
| NM_022390    | Qdpr    | 1.37 | 3.78E-02 | DOWN | 2.14 | 4.75E-02 | DOWN |
| NM_001009646 | Qprt    | 1.40 | 1.47E-02 | DOWN | 2.43 | 4.00E-02 | DOWN |
| NM_001130557 | R3hdm2  | 1.30 | 2.16E-02 | DOWN | 1.57 | 4.31E-02 | DOWN |
| NM_031152    | Rab11a  | 1.28 | 3.72E-02 | DOWN | 1.54 | 1.31E-02 | DOWN |
| NM_001109979 | Rab1b   | 1.36 | 2.03E-02 | DOWN | 1.50 | 4.48E-02 | DOWN |
| NM_001015012 | Rab30   | 1.60 | 2.70E-02 | UP   | 2.85 | 1.13E-02 | DOWN |
| NM_001108944 | Rab33b  | 1.32 | 2.32E-02 | DOWN | 1.81 | 8.48E-03 | DOWN |
| NM_001012140 | Rab34   | 1.45 | 2.28E-02 | DOWN | 1.51 | 2.28E-02 | DOWN |
| NM_145774    | Rab38   | 1.82 | 1.42E-03 | DOWN | 1.88 | 9.27E-03 | DOWN |
| NM_017313    | Rab3ip  | 1.29 | 2.05E-02 | DOWN | 1.99 | 3.51E-02 | DOWN |
| NM_013019    | Rab4a   | 1.47 | 9.30E-03 | DOWN | 1.70 | 5.60E-03 | DOWN |

|              |            |      |          |      |      |          |      |
|--------------|------------|------|----------|------|------|----------|------|
| NM_023950    | Rab7a      | 1.17 | 3.70E-02 | DOWN | 1.64 | 7.49E-03 | DOWN |
| NM_053998    | Rab8a      | 1.35 | 2.67E-02 | DOWN | 1.93 | 1.71E-02 | DOWN |
| NM_019124    | Rabep1     | 1.44 | 4.62E-03 | DOWN | 1.57 | 6.53E-03 | DOWN |
| NM_001024871 | Rabepk     | 1.41 | 6.16E-04 | DOWN | 1.60 | 2.08E-03 | DOWN |
| NM_031654    | Rabggta    | 1.30 | 1.09E-02 | DOWN | 1.70 | 8.26E-03 | DOWN |
| NM_001007678 | Rabif      | 1.27 | 4.03E-03 | DOWN | 1.51 | 3.50E-02 | DOWN |
| NM_001013221 | Rabl2a     | 1.25 | 3.88E-02 | DOWN | 1.75 | 1.18E-02 | DOWN |
| NM_001191755 | Rad54b     | 1.20 | 3.53E-02 | UP   | 1.09 | 4.55E-02 | DOWN |
| NM_053439    | Ran        | 1.36 | 1.53E-02 | DOWN | 1.38 | 3.18E-02 | DOWN |
| NM_001106950 | Rap2c      | 1.39 | 8.08E-03 | DOWN | 1.59 | 5.12E-03 | DOWN |
| NM_031528    | Rara       | 1.40 | 8.77E-04 | DOWN | 1.70 | 4.17E-02 | DOWN |
| NM_021764    | Rbck1      | 1.44 | 8.13E-03 | DOWN | 1.46 | 4.81E-02 | DOWN |
| NM_001107373 | Rbfa       | 1.49 | 9.23E-04 | DOWN | 2.00 | 1.63E-04 | DOWN |
| NM_001277160 | Rbm26      | 1.28 | 2.61E-02 | DOWN | 1.43 | 1.62E-02 | DOWN |
| NM_153306    | Rbm45      | 1.27 | 3.48E-02 | DOWN | 1.55 | 1.25E-02 | DOWN |
| NM_001025663 | RbmX       | 1.37 | 4.65E-03 | DOWN | 1.46 | 2.10E-02 | DOWN |
| NM_001034135 | Rbx1       | 1.30 | 2.05E-02 | DOWN | 1.74 | 1.14E-02 | DOWN |
| NM_001100585 | Rce1       | 1.21 | 3.63E-02 | DOWN | 1.72 | 1.02E-02 | DOWN |
| NM_001105842 | Rdm1       | 1.47 | 4.86E-03 | DOWN | 1.61 | 4.64E-02 | DOWN |
| NM_001005889 | Rdx        | 1.33 | 3.19E-02 | DOWN | 1.86 | 1.39E-03 | DOWN |
| NM_001105853 | Recql5     | 1.44 | 2.70E-02 | DOWN | 1.70 | 8.90E-03 | DOWN |
| NM_001025279 | Reep4      | 1.37 | 4.02E-02 | DOWN | 1.53 | 4.78E-02 | DOWN |
| NM_001008326 | Rexo2      | 1.30 | 3.29E-02 | DOWN | 1.85 | 1.13E-03 | DOWN |
| NM_001105869 | Rfc4       | 1.22 | 2.38E-02 | DOWN | 1.55 | 7.67E-03 | DOWN |
| NM_001135866 | Rft1       | 1.41 | 3.22E-04 | DOWN | 1.40 | 3.21E-02 | DOWN |
| NM_001127490 | Rfx7       | 1.33 | 1.99E-02 | DOWN | 1.48 | 4.17E-02 | DOWN |
| NM_001013136 | Rfxank     | 1.42 | 3.85E-02 | DOWN | 1.62 | 2.85E-02 | DOWN |
| NM_001004225 | RGD1303003 | 1.33 | 2.23E-02 | DOWN | 1.60 | 4.35E-02 | DOWN |
| NM_001134547 | RGD1304770 | 1.58 | 7.14E-03 | DOWN | 1.86 | 3.51E-02 | DOWN |
| NM_001106730 | RGD1305089 | 1.27 | 3.44E-02 | DOWN | 1.66 | 1.27E-02 | DOWN |
| NM_001127452 | RGD1305587 | 1.48 | 3.64E-03 | DOWN | 2.05 | 3.56E-02 | DOWN |
| NM_001106026 | RGD1306063 | 1.60 | 1.14E-03 | DOWN | 1.70 | 1.64E-02 | DOWN |
| NM_001108746 | RGD1306474 | 1.53 | 1.69E-02 | DOWN | 1.57 | 7.18E-03 | DOWN |
| NM_001037188 | RGD1307155 | 1.44 | 1.37E-02 | DOWN | 1.79 | 1.01E-02 | DOWN |
| NM_001134508 | RGD1307603 | 2.00 | 1.84E-02 | DOWN | 4.00 | 1.60E-02 | DOWN |
| NM_001134575 | RGD1308106 | 1.33 | 4.43E-02 | DOWN | 1.33 | 2.78E-02 | DOWN |
| NM_001127521 | RGD1308134 | 1.34 | 6.33E-03 | DOWN | 1.57 | 4.42E-03 | DOWN |
| NM_001106491 | RGD1309730 | 1.63 | 1.60E-03 | DOWN | 1.60 | 1.21E-02 | DOWN |
| NM_001035517 | RGD1310127 | 1.34 | 2.02E-03 | DOWN | 1.59 | 3.14E-02 | DOWN |
| NM_001106765 | RGD1310212 | 1.33 | 8.44E-03 | DOWN | 1.63 | 1.20E-02 | DOWN |
| NM_001106999 | RGD1310352 | 1.22 | 2.61E-02 | DOWN | 1.90 | 5.24E-03 | DOWN |

|              |            |      |          |      |      |          |      |
|--------------|------------|------|----------|------|------|----------|------|
| NM_001173436 | RGD1311345 | 1.31 | 3.97E-02 | DOWN | 1.79 | 2.78E-02 | DOWN |
| NM_001014075 | RGD1311648 | 1.29 | 4.66E-02 | DOWN | 1.69 | 2.01E-02 | DOWN |
| NM_001013898 | RGD1311703 | 1.27 | 2.84E-02 | DOWN | 1.44 | 4.39E-02 | DOWN |
| NM_001047898 | RGD1359290 | 1.36 | 1.86E-02 | DOWN | 1.89 | 1.43E-03 | DOWN |
| NM_001107915 | RGD1559904 | 1.30 | 1.23E-02 | DOWN | 1.52 | 2.63E-02 | DOWN |
| NM_001107685 | RGD1560010 | 1.62 | 1.12E-03 | UP   | 1.65 | 1.51E-03 | DOWN |
| NM_001134616 | RGD1560065 | 1.30 | 3.60E-02 | DOWN | 1.55 | 1.61E-02 | DOWN |
| NM_001025122 | RGD1561328 | 1.45 | 3.11E-02 | DOWN | 1.72 | 3.39E-03 | DOWN |
| NM_001170475 | RGD1562018 | 1.23 | 1.11E-02 | DOWN | 1.88 | 1.84E-02 | DOWN |
| NM_001106212 | RGD1562747 | 1.36 | 4.67E-02 | DOWN | 1.56 | 4.60E-02 | DOWN |
| NM_001173472 | RGD1562987 | 1.30 | 3.74E-02 | DOWN | 1.84 | 7.41E-03 | DOWN |
| NM_001105946 | RGD1564093 | 1.25 | 4.85E-02 | DOWN | 1.80 | 6.19E-03 | DOWN |
| NM_001126295 | RGD1564379 | 1.43 | 9.44E-03 | DOWN | 1.61 | 1.56E-02 | DOWN |
| NM_001164396 | RGD1564865 | 1.80 | 5.89E-03 | DOWN | 3.00 | 1.05E-02 | DOWN |
| NM_001271394 | RGD1565002 | 1.53 | 2.76E-02 | DOWN | 1.73 | 2.35E-02 | DOWN |
| NM_001109050 | RGD1565033 | 1.45 | 8.80E-04 | DOWN | 1.55 | 2.12E-02 | DOWN |
| NM_001109101 | RGD1565222 | 1.15 | 4.16E-02 | DOWN | 1.42 | 7.87E-03 | DOWN |
| NM_001109179 | RGD1565641 | 1.32 | 4.55E-02 | DOWN | 1.85 | 5.13E-04 | DOWN |
| NM_001126286 | RGD1565685 | 1.26 | 2.33E-02 | DOWN | 1.65 | 5.52E-03 | DOWN |
| NM_001115047 | RGD1566052 | 1.34 | 2.47E-02 | DOWN | 1.33 | 3.67E-02 | DOWN |
| NM_199493    | RGD735029  | 1.45 | 3.08E-03 | DOWN | 1.52 | 1.53E-02 | DOWN |
| NM_199379    | RGD735065  | 1.46 | 2.75E-02 | DOWN | 1.95 | 2.88E-02 | DOWN |
| NM_001106805 | Rgl3       | 1.71 | 2.11E-03 | DOWN | 1.81 | 4.12E-02 | DOWN |
| NM_001077589 | Rgs16      | 9.87 | 2.42E-04 | UP   | 5.32 | 6.03E-03 | UP   |
| NM_001105819 | Rhbdl3     | 1.24 | 2.70E-02 | DOWN | 3.02 | 1.28E-04 | UP   |
| NM_001007715 | Ribc1      | 1.52 | 7.13E-03 | DOWN | 1.51 | 3.41E-02 | DOWN |
| NM_001105811 | Rilp       | 1.32 | 2.18E-02 | DOWN | 1.61 | 3.37E-02 | DOWN |
| NM_001107786 | Rin2       | 1.73 | 1.49E-02 | DOWN | 2.11 | 2.19E-02 | DOWN |
| NM_212549    | Ring1      | 1.43 | 1.70E-02 | DOWN | 1.43 | 4.55E-02 | DOWN |
| NM_001106241 | Rinl       | 1.47 | 1.09E-02 | DOWN | 1.66 | 1.14E-02 | DOWN |
| NM_001031663 | Rmdn1      | 1.29 | 3.92E-02 | DOWN | 2.17 | 7.55E-04 | DOWN |
| NM_001037200 | Rmdn2      | 2.41 | 1.54E-03 | DOWN | 2.32 | 3.58E-02 | DOWN |
| NM_001106210 | Rnaset2    | 1.23 | 4.84E-02 | DOWN | 1.52 | 4.54E-02 | DOWN |
| NM_001107540 | Rnf121     | 1.34 | 2.73E-02 | DOWN | 1.44 | 1.71E-02 | DOWN |
| NM_001127545 | Rnf139     | 1.28 | 4.64E-02 | DOWN | 1.77 | 4.00E-02 | DOWN |
| NM_001008361 | Rnf167     | 1.38 | 4.52E-03 | DOWN | 1.49 | 2.77E-02 | DOWN |
| NM_001107234 | Rnf215     | 1.28 | 1.73E-02 | DOWN | 1.76 | 3.55E-03 | DOWN |
| NM_001113748 | Rnf26      | 1.44 | 1.71E-02 | DOWN | 1.60 | 4.70E-02 | DOWN |
| NM_001135921 | Rnf43      | 1.93 | 1.18E-02 | DOWN | 2.06 | 1.04E-02 | DOWN |
| NM_001107923 | Rngtt      | 1.19 | 4.24E-02 | DOWN | 1.72 | 8.08E-03 | DOWN |
| NM_139105    | Rnh1       | 1.44 | 3.83E-02 | DOWN | 1.97 | 1.61E-02 | DOWN |

|              |          |      |          |      |      |          |      |
|--------------|----------|------|----------|------|------|----------|------|
| NM_001014167 | Rnls     | 1.31 | 3.18E-02 | DOWN | 2.07 | 3.17E-02 | DOWN |
| NM_001195490 | Romo1    | 1.59 | 3.88E-02 | DOWN | 1.66 | 3.11E-02 | DOWN |
| NM_001109012 | Rp2      | 1.41 | 1.10E-02 | DOWN | 1.51 | 9.15E-03 | DOWN |
| NM_001004243 | Rpap3    | 1.22 | 1.49E-02 | DOWN | 1.47 | 1.36E-02 | DOWN |
| NM_001130578 | Rps19bp1 | 1.39 | 4.69E-03 | DOWN | 1.65 | 4.66E-03 | DOWN |
| NM_001010962 | Rps6kb2  | 1.34 | 3.56E-02 | DOWN | 1.64 | 1.98E-02 | DOWN |
| NM_001134499 | Rptor    | 1.25 | 4.55E-02 | DOWN | 1.47 | 2.17E-02 | DOWN |
| NM_001108641 | Rpusd3   | 1.61 | 6.78E-03 | DOWN | 1.88 | 4.10E-03 | DOWN |
| NM_001109404 | Rsu1     | 1.54 | 1.90E-04 | DOWN | 1.72 | 1.06E-03 | DOWN |
| NM_001008831 | RT1-Ba   | 1.36 | 3.29E-02 | DOWN | 2.13 | 3.02E-02 | DOWN |
| NM_001008847 | RT1-Da   | 1.44 | 7.48E-03 | DOWN | 2.21 | 3.06E-02 | DOWN |
| NM_001008884 | RT1-Db1  | 1.35 | 4.39E-02 | DOWN | 2.03 | 4.25E-02 | DOWN |
| NM_012646    | RT1-N1   | 3.03 | 4.18E-03 | DOWN | 2.78 | 5.41E-03 | DOWN |
| NM_001004227 | Rtcd1    | 1.39 | 3.03E-02 | DOWN | 1.57 | 2.31E-02 | DOWN |
| NM_001033890 | Rtfdc1   | 1.31 | 2.92E-02 | DOWN | 1.48 | 3.44E-02 | DOWN |
| NM_001047116 | Rundc3b  | 1.37 | 2.64E-02 | DOWN | 1.53 | 4.11E-03 | DOWN |
| NM_147177    | Ruvbl1   | 1.29 | 1.07E-02 | DOWN | 1.39 | 2.90E-02 | DOWN |
| NM_001271173 | Sbf1     | 1.32 | 2.81E-02 | DOWN | 1.47 | 3.14E-02 | DOWN |
| NM_019384    | Scaf1    | 1.36 | 1.08E-02 | DOWN | 1.45 | 4.90E-02 | DOWN |
| NM_001013985 | Sccpdh   | 1.27 | 3.01E-02 | DOWN | 1.72 | 1.52E-02 | DOWN |
| NM_019364    | Scfd1    | 1.51 | 3.32E-03 | DOWN | 1.51 | 2.76E-02 | DOWN |
| NM_001107638 | Scml4    | 1.61 | 9.92E-03 | DOWN | 1.89 | 3.38E-02 | DOWN |
| NM_031548    | Scnn1a   | 1.97 | 2.38E-02 | DOWN | 2.51 | 1.41E-02 | DOWN |
| NM_138508    | Scp2     | 1.59 | 2.39E-03 | DOWN | 2.68 | 1.51E-02 | DOWN |
| NM_001012142 | Scrn2    | 1.68 | 4.69E-04 | DOWN | 2.17 | 5.90E-03 | DOWN |
| NM_001011938 | Scyl1    | 1.26 | 4.13E-02 | DOWN | 1.54 | 1.48E-02 | DOWN |
| NM_013082    | Sdc2     | 1.22 | 2.45E-02 | DOWN | 2.62 | 3.75E-02 | DOWN |
| NM_130412    | Sdf4     | 1.26 | 1.80E-02 | DOWN | 1.94 | 1.36E-02 | DOWN |
| NM_001008371 | Sdhaf2   | 1.38 | 1.29E-02 | DOWN | 1.61 | 1.32E-02 | DOWN |
| NM_001100539 | Sdhb     | 1.38 | 1.17E-02 | DOWN | 1.64 | 1.51E-02 | DOWN |
| NM_031723    | Sec11a   | 1.32 | 1.95E-02 | DOWN | 1.60 | 3.12E-02 | DOWN |
| NM_153628    | Sec11c   | 1.34 | 3.09E-02 | DOWN | 1.77 | 2.57E-02 | DOWN |
| NM_001006978 | Sec13    | 1.51 | 6.49E-03 | DOWN | 1.67 | 5.85E-03 | DOWN |
| NM_057147    | Sec22a   | 1.49 | 3.36E-03 | DOWN | 1.72 | 4.88E-02 | DOWN |
| NM_001106474 | Sec24b   | 1.25 | 1.10E-02 | DOWN | 1.32 | 3.97E-02 | DOWN |
| NM_001109456 | Sec24c   | 1.35 | 2.64E-02 | DOWN | 1.67 | 2.12E-02 | DOWN |
| NM_001107637 | Sec63    | 1.28 | 3.05E-02 | DOWN | 1.91 | 3.19E-02 | DOWN |
| NM_080892    | Selenbp1 | 1.36 | 2.78E-02 | DOWN | 1.83 | 1.66E-02 | DOWN |
| NM_207589    | Selk     | 1.33 | 3.25E-02 | DOWN | 1.69 | 1.53E-02 | DOWN |
| NM_001105888 | Senp7    | 1.24 | 1.19E-02 | DOWN | 1.40 | 2.53E-02 | DOWN |
| NM_001128287 | Sepsecs  | 1.31 | 2.81E-02 | DOWN | 1.84 | 3.98E-02 | DOWN |

|              |          |      |          |      |      |          |      |
|--------------|----------|------|----------|------|------|----------|------|
| NM_022616    | Septin 7 | 1.31 | 4.80E-02 | DOWN | 2.04 | 1.36E-03 | DOWN |
| NM_001113497 | Septin 9 | 1.57 | 5.64E-03 | DOWN | 1.96 | 8.11E-03 | DOWN |
| NM_001130579 | Serhl2   | 1.80 | 1.49E-02 | DOWN | 2.18 | 2.25E-02 | DOWN |
| NM_177927    | Serpinf1 | 1.36 | 2.09E-02 | DOWN | 2.53 | 3.96E-02 | DOWN |
| NM_001017513 | Sertad3  | 1.54 | 2.95E-02 | DOWN | 1.88 | 1.39E-02 | DOWN |
| NM_001106167 | Setd6    | 1.29 | 4.61E-02 | DOWN | 1.98 | 1.51E-03 | DOWN |
| NM_001271175 | Setdb1   | 1.52 | 1.04E-02 | DOWN | 1.72 | 1.27E-02 | DOWN |
| NM_001105754 | Sez6     | 1.25 | 4.48E-02 | DOWN | 6.76 | 1.11E-03 | DOWN |
| NM_001025698 | Sf3a3    | 1.40 | 1.10E-02 | DOWN | 1.46 | 3.79E-02 | DOWN |
| NM_031647    | Sfmbt1   | 1.52 | 9.18E-03 | DOWN | 1.71 | 1.30E-02 | DOWN |
| NM_001034924 | Sfswap   | 1.34 | 4.19E-02 | DOWN | 1.53 | 2.87E-02 | DOWN |
| NM_001008302 | Sft2d1   | 1.25 | 2.40E-02 | DOWN | 1.59 | 4.72E-02 | DOWN |
| NM_001034011 | Sft2d2   | 1.35 | 2.03E-02 | DOWN | 1.69 | 4.19E-02 | DOWN |
| NM_134463    | Sgk2     | 2.46 | 1.71E-03 | DOWN | 3.12 | 7.55E-03 | DOWN |
| NM_001271080 | Shkbp1   | 1.50 | 7.87E-03 | DOWN | 1.70 | 9.94E-03 | DOWN |
| NM_001008322 | Shmt2    | 1.38 | 2.74E-02 | DOWN | 2.18 | 1.14E-02 | DOWN |
| NM_001108759 | Siae     | 1.40 | 2.02E-03 | DOWN | 2.33 | 5.67E-03 | DOWN |
| NM_001024887 | Sigirr   | 1.48 | 6.52E-03 | DOWN | 2.30 | 3.55E-02 | DOWN |
| NM_030996    | Sigmar1  | 2.00 | 5.62E-05 | DOWN | 2.54 | 3.22E-02 | DOWN |
| NM_199376    | Sil1     | 1.28 | 3.93E-02 | DOWN | 1.84 | 4.23E-02 | DOWN |
| NM_001115038 | Sin3b    | 1.43 | 3.37E-02 | DOWN | 1.59 | 2.83E-02 | DOWN |
| NM_001008368 | Sirt2    | 1.31 | 2.74E-02 | DOWN | 1.60 | 2.17E-02 | DOWN |
| NM_213559    | Skiv2l   | 1.32 | 2.37E-02 | DOWN | 1.56 | 2.54E-02 | DOWN |
| NM_001106416 | Skp2     | 1.26 | 3.40E-02 | DOWN | 1.38 | 1.56E-02 | DOWN |
| NM_017047    | Slc10a1  | 1.52 | 3.04E-02 | DOWN | 3.40 | 2.26E-02 | DOWN |
| NM_001025280 | Slc10a5  | 1.37 | 9.81E-03 | DOWN | 1.48 | 2.50E-02 | DOWN |
| NM_001012621 | Slc13a4  | 2.67 | 3.88E-04 | DOWN | 5.81 | 1.14E-03 | DOWN |
| NM_001013913 | Slc16a4  | 1.54 | 4.71E-03 | DOWN | 3.86 | 5.99E-03 | DOWN |
| NM_001271214 | Slc17a4  | 1.55 | 1.77E-03 | DOWN | 2.48 | 4.80E-02 | DOWN |
| NM_001030024 | Slc19a2  | 1.52 | 1.08E-02 | DOWN | 2.63 | 4.86E-02 | DOWN |
| NM_017315    | Slc23a1  | 1.68 | 1.18E-03 | DOWN | 2.35 | 4.00E-02 | DOWN |
| NM_001017488 | Slc24a6  | 1.45 | 2.78E-02 | DOWN | 1.87 | 2.93E-02 | DOWN |
| NM_139100    | Slc25a3  | 1.33 | 1.87E-02 | DOWN | 2.09 | 1.74E-02 | DOWN |
| NM_001030032 | Slc25a38 | 1.41 | 4.38E-02 | DOWN | 2.10 | 8.34E-03 | DOWN |
| NM_001024792 | Slc25a39 | 1.35 | 8.67E-03 | DOWN | 2.12 | 5.90E-03 | DOWN |
| NM_001127590 | Slc25a42 | 1.52 | 3.28E-02 | UP   | 2.01 | 6.40E-03 | DOWN |
| NM_057102    | Slc25a5  | 1.33 | 3.68E-02 | DOWN | 2.33 | 1.27E-02 | DOWN |
| NM_001143817 | Slc26a6  | 1.52 | 6.04E-03 | DOWN | 1.45 | 4.51E-02 | DOWN |
| NM_031684    | Slc29a1  | 1.81 | 2.60E-03 | DOWN | 1.78 | 3.82E-02 | DOWN |
| NM_181639    | Slc29a3  | 1.79 | 8.74E-04 | DOWN | 1.61 | 1.45E-02 | DOWN |
| NM_053494    | Slc2a8   | 1.49 | 7.08E-03 | DOWN | 1.61 | 1.62E-02 | DOWN |

|              |          |      |          |      |      |          |      |
|--------------|----------|------|----------|------|------|----------|------|
| NM_001105985 | Slc30a10 | 1.35 | 4.56E-02 | DOWN | 2.01 | 4.78E-02 | DOWN |
| NM_001107924 | Slc35a1  | 1.24 | 1.68E-02 | DOWN | 1.81 | 5.98E-03 | DOWN |
| NM_001106590 | Slc35b4  | 1.32 | 2.23E-02 | DOWN | 1.47 | 1.54E-02 | DOWN |
| NM_001105950 | Slc35f5  | 1.35 | 1.87E-02 | DOWN | 1.45 | 1.25E-02 | DOWN |
| NM_001008356 | Slc39a3  | 1.44 | 1.55E-02 | DOWN | 1.60 | 4.45E-02 | DOWN |
| NM_001008885 | Slc39a7  | 1.50 | 4.11E-02 | DOWN | 1.80 | 4.67E-02 | DOWN |
| NM_001011952 | Slc39a8  | 1.73 | 3.81E-03 | DOWN | 2.68 | 1.65E-02 | DOWN |
| NM_001108742 | Slc41a2  | 1.38 | 1.70E-02 | DOWN | 2.71 | 3.25E-02 | DOWN |
| NM_130746    | Slc5a6   | 1.46 | 3.76E-02 | DOWN | 1.65 | 4.01E-02 | DOWN |
| NM_017335    | Slc6a12  | 1.37 | 2.80E-02 | DOWN | 2.43 | 2.56E-02 | DOWN |
| NM_053811    | Slc9a3r2 | 1.28 | 4.08E-02 | DOWN | 1.40 | 4.78E-02 | DOWN |
| NM_031650    | Slco1b2  | 1.99 | 8.03E-03 | DOWN | 2.80 | 4.79E-02 | DOWN |
| NM_001108222 | Smarcal1 | 1.33 | 1.92E-02 | DOWN | 1.70 | 2.12E-03 | DOWN |
| NM_001024993 | Smarce1  | 1.30 | 1.19E-02 | DOWN | 1.63 | 1.78E-02 | DOWN |
| NM_031683    | Smc1a    | 1.29 | 3.13E-02 | DOWN | 1.50 | 1.43E-02 | DOWN |
| NM_001134584 | Smco4    | 1.69 | 5.09E-04 | DOWN | 1.92 | 5.49E-03 | DOWN |
| NM_001131000 | Smim11   | 1.45 | 1.89E-02 | DOWN | 1.74 | 3.10E-02 | DOWN |
| NM_001201374 | Smim8    | 1.40 | 6.76E-03 | DOWN | 2.19 | 2.54E-03 | DOWN |
| NR_051995    | Smndc1   | 1.53 | 1.80E-02 | DOWN | 2.03 | 1.32E-02 | DOWN |
| NM_001006997 | Smpd1    | 1.41 | 5.29E-03 | DOWN | 1.90 | 1.05E-02 | DOWN |
| NM_001167806 | Smpd4    | 1.29 | 6.36E-03 | DOWN | 1.57 | 9.07E-03 | DOWN |
| NM_057195    | Smu1     | 1.32 | 1.23E-02 | DOWN | 1.44 | 3.10E-02 | DOWN |
| NM_013035    | Snai2    | 1.83 | 1.29E-03 | DOWN | 1.42 | 4.49E-02 | DOWN |
| NM_001108033 | Snapc1   | 1.41 | 3.45E-03 | DOWN | 1.63 | 2.85E-03 | DOWN |
| NM_001170576 | Snapi    | 1.37 | 1.32E-02 | DOWN | 1.50 | 2.26E-02 | DOWN |
| NM_001109399 | Snrpd2   | 1.35 | 3.26E-02 | DOWN | 1.56 | 2.46E-02 | DOWN |
| NM_001004270 | Snupn    | 1.37 | 2.36E-02 | DOWN | 1.56 | 1.93E-02 | DOWN |
| NM_001109279 | Snw1     | 1.31 | 4.53E-02 | DOWN | 1.69 | 7.25E-03 | DOWN |
| NM_053411    | Snx1     | 1.40 | 2.48E-03 | DOWN | 1.45 | 2.69E-02 | DOWN |
| NM_001108131 | Snx19    | 1.40 | 4.30E-02 | DOWN | 1.79 | 6.76E-03 | DOWN |
| NM_001106518 | Snx5     | 1.36 | 8.14E-03 | DOWN | 1.45 | 3.30E-02 | DOWN |
| NM_001127637 | Snx9     | 1.30 | 1.92E-02 | DOWN | 1.49 | 3.14E-02 | DOWN |
| NM_153728    | Soat2    | 1.53 | 2.20E-02 | DOWN | 2.57 | 3.07E-02 | DOWN |
| NM_001271149 | Socs6    | 1.23 | 2.09E-02 | DOWN | 1.54 | 4.26E-03 | DOWN |
| NM_001106552 | Sp5      | 1.33 | 1.00E-02 | DOWN | 1.44 | 1.32E-02 | DOWN |
| NM_053482    | Spa17    | 1.40 | 7.64E-03 | DOWN | 1.67 | 3.80E-02 | DOWN |
| NM_001191601 | Spcs2    | 1.40 | 6.51E-03 | DOWN | 1.59 | 1.98E-02 | DOWN |
| NM_001006987 | Spg21    | 1.44 | 8.45E-03 | DOWN | 1.90 | 1.74E-02 | DOWN |
| NM_001271297 | Spock1   | 1.34 | 9.31E-04 | DOWN | 1.56 | 6.15E-03 | DOWN |
| NM_138533    | Spon2    | 1.60 | 1.88E-04 | DOWN | 1.48 | 8.47E-03 | DOWN |
| NM_001014200 | Sppl2b   | 1.39 | 1.83E-02 | DOWN | 1.54 | 2.09E-02 | DOWN |

|              |          |      |          |      |      |          |      |
|--------------|----------|------|----------|------|------|----------|------|
| NM_019181    | Spr      | 1.34 | 4.73E-02 | DOWN | 2.14 | 8.55E-03 | DOWN |
| NM_001037765 | Spryd4   | 1.56 | 2.11E-03 | DOWN | 1.84 | 1.51E-03 | DOWN |
| NM_001106988 | Spsb3    | 1.40 | 3.49E-02 | DOWN | 1.58 | 2.73E-02 | DOWN |
| NM_001008373 | Srek1ip1 | 1.30 | 1.67E-02 | DOWN | 1.55 | 1.99E-02 | DOWN |
| NM_001106497 | Srp14    | 1.25 | 4.95E-02 | DOWN | 1.75 | 3.13E-03 | DOWN |
| NM_001106157 | Srp19    | 1.37 | 3.74E-02 | DOWN | 1.59 | 2.30E-02 | DOWN |
| NM_001195505 | Srsf5    | 1.38 | 2.53E-02 | DOWN | 2.56 | 2.67E-03 | DOWN |
| NM_001009255 | Srsf9    | 1.24 | 8.02E-03 | DOWN | 1.79 | 8.08E-03 | DOWN |
| NM_031119    | Ssb      | 1.27 | 9.19E-03 | DOWN | 1.81 | 1.78E-03 | DOWN |
| NM_183328    | Ssbp1    | 1.35 | 2.47E-02 | DOWN | 2.16 | 3.22E-03 | DOWN |
| NM_001107820 | Ssna1    | 1.38 | 9.69E-03 | DOWN | 1.97 | 3.20E-03 | DOWN |
| NM_031120    | Ssr3     | 1.31 | 1.58E-02 | DOWN | 1.69 | 2.68E-02 | DOWN |
| NM_017199    | Ssr4     | 1.31 | 3.12E-02 | DOWN | 1.71 | 1.26E-02 | DOWN |
| NM_207602    | St3gal6  | 1.32 | 1.38E-02 | DOWN | 1.54 | 2.74E-02 | DOWN |
| NM_001007639 | St7l     | 1.37 | 3.79E-02 | DOWN | 1.49 | 3.27E-02 | DOWN |
| NM_013029    | St8sia3  | 1.62 | 3.06E-02 | DOWN | 2.95 | 7.23E-03 | DOWN |
| NM_001108179 | Stag1    | 1.52 | 3.41E-02 | DOWN | 1.98 | 7.22E-03 | DOWN |
| NM_138531    | Stambp   | 1.31 | 4.67E-02 | DOWN | 1.56 | 2.67E-02 | DOWN |
| NM_001013069 | Stard10  | 1.41 | 2.80E-02 | DOWN | 2.25 | 4.70E-02 | DOWN |
| NM_001109060 | Stard13  | 1.73 | 1.51E-02 | DOWN | 2.29 | 9.58E-03 | DOWN |
| NM_001008298 | Stard3nl | 1.45 | 1.42E-03 | DOWN | 1.62 | 6.82E-03 | DOWN |
| NM_017064    | Stat5a   | 1.53 | 5.24E-03 | DOWN | 1.63 | 3.01E-03 | DOWN |
| NM_001109907 | Stau1    | 1.52 | 3.62E-02 | DOWN | 1.78 | 7.54E-03 | DOWN |
| NM_173142    | Stk16    | 1.37 | 1.13E-02 | DOWN | 2.07 | 2.05E-02 | DOWN |
| NM_031735    | Stk3     | 1.20 | 3.44E-02 | DOWN | 1.59 | 1.91E-03 | DOWN |
| NM_001083336 | Stk38l   | 1.34 | 5.66E-03 | DOWN | 1.49 | 1.73E-02 | DOWN |
| NM_024346    | Stmn3    | 1.39 | 5.35E-03 | DOWN | 1.30 | 2.41E-02 | DOWN |
| NM_001031646 | Stoml2   | 1.36 | 1.07E-02 | DOWN | 1.68 | 1.12E-02 | DOWN |
| NM_012748    | Stx2     | 1.69 | 8.73E-03 | DOWN | 2.02 | 7.56E-03 | DOWN |
| NM_031656    | Stx8     | 1.41 | 4.60E-03 | DOWN | 1.84 | 1.31E-03 | DOWN |
| NM_031126    | Stxbp2   | 1.39 | 1.71E-02 | DOWN | 1.71 | 4.21E-02 | DOWN |
| NM_001100750 | Suclg2   | 1.27 | 2.86E-02 | DOWN | 1.97 | 1.64E-02 | DOWN |
| NM_133547    | Sult1c2  | 3.34 | 8.51E-03 | DOWN | 3.45 | 3.89E-02 | DOWN |
| NM_001013177 | Sult1c2a | 1.70 | 4.92E-03 | DOWN | 2.78 | 4.41E-02 | DOWN |
| NM_001024295 | Sumo3    | 1.38 | 1.37E-02 | DOWN | 1.55 | 3.98E-02 | DOWN |
| NM_172068    | Surf1    | 1.37 | 9.66E-03 | DOWN | 1.47 | 1.73E-02 | DOWN |
| NM_001033868 | Surf4    | 1.57 | 1.98E-03 | DOWN | 1.87 | 3.62E-02 | DOWN |
| NM_001107475 | Suv420h2 | 1.62 | 5.28E-04 | DOWN | 1.58 | 2.63E-02 | DOWN |
| NM_001246661 | Swi5     | 1.33 | 3.36E-02 | DOWN | 1.64 | 1.95E-02 | DOWN |
| NM_001004253 | Syap1    | 1.28 | 1.16E-02 | DOWN | 1.57 | 4.12E-03 | DOWN |
| NM_181632    | Syt15    | 1.26 | 2.34E-02 | DOWN | 1.40 | 1.09E-02 | UP   |

|                |          |      |          |      |      |          |      |
|----------------|----------|------|----------|------|------|----------|------|
| NM_001108302   | Taco1    | 1.38 | 3.27E-03 | DOWN | 1.88 | 4.90E-05 | DOWN |
| NM_001025734   | Tada3    | 1.51 | 2.41E-03 | DOWN | 1.39 | 4.25E-02 | DOWN |
| NM_031811      | Taldo1   | 1.35 | 6.50E-03 | DOWN | 1.67 | 1.28E-02 | DOWN |
| NM_001106622   | Tapbp1   | 1.67 | 7.88E-04 | DOWN | 1.70 | 4.39E-02 | DOWN |
| NM_001014040   | Tars2    | 1.48 | 2.08E-03 | DOWN | 1.42 | 3.87E-02 | DOWN |
| NM_001044243   | Tasp1    | 1.46 | 4.43E-02 | DOWN | 1.54 | 2.71E-02 | DOWN |
| NM_001025748   | Taz      | 1.36 | 1.30E-02 | DOWN | 1.55 | 4.15E-02 | DOWN |
| NM_001108921   | Tbc1d10b | 1.37 | 1.33E-02 | DOWN | 1.46 | 3.77E-02 | DOWN |
| NM_001134842   | Tbc1d31  | 1.33 | 1.60E-02 | DOWN | 1.48 | 1.18E-03 | DOWN |
| NM_001040180.1 | Tbcb     | 1.49 | 3.82E-02 | DOWN | 2.43 | 2.58E-02 | DOWN |
| NM_001012161   | Tbce     | 1.33 | 4.76E-02 | DOWN | 1.93 | 8.86E-04 | DOWN |
| NM_001025152   | Tc2n     | 1.34 | 2.16E-02 | DOWN | 1.57 | 8.63E-03 | DOWN |
| NM_001014275   | Tceal8   | 1.37 | 5.04E-03 | DOWN | 1.45 | 2.08E-02 | DOWN |
| NM_001014260   | Tceanc2  | 1.34 | 3.89E-03 | DOWN | 1.64 | 1.09E-02 | DOWN |
| NM_001270562   | Tceb1    | 1.41 | 1.40E-02 | DOWN | 2.09 | 1.11E-03 | DOWN |
| NM_001191052   | Tcf7l2   | 1.49 | 2.30E-02 | DOWN | 1.96 | 5.19E-03 | DOWN |
| NM_001191666   | Tchp     | 1.31 | 4.27E-02 | DOWN | 1.45 | 3.57E-02 | DOWN |
| NM_199089      | Tcirg1   | 1.87 | 1.87E-03 | DOWN | 1.84 | 1.52E-02 | DOWN |
| NM_001025626   | Tefm     | 1.33 | 1.79E-02 | DOWN | 1.41 | 2.31E-02 | DOWN |
| NR_001567      | Terc     | 1.25 | 1.66E-03 | DOWN | 1.19 | 5.93E-03 | DOWN |
| NM_133396      | Tesk2    | 1.52 | 5.81E-03 | DOWN | 1.72 | 1.28E-02 | DOWN |
| NM_181474      | Tfb1m    | 1.34 | 2.60E-02 | DOWN | 1.87 | 6.10E-03 | DOWN |
| NM_001134714   | Tfcp2    | 1.64 | 1.89E-02 | DOWN | 1.67 | 4.38E-02 | DOWN |
| NM_001012144   | Tfg      | 1.46 | 6.24E-03 | DOWN | 1.53 | 3.10E-02 | DOWN |
| NM_017200      | Tfpi     | 1.39 | 3.14E-02 | DOWN | 1.42 | 4.94E-02 | DOWN |
| NM_001009658   | Thnsl2   | 1.80 | 1.59E-04 | DOWN | 1.94 | 7.17E-03 | DOWN |
| NM_001106059   | Thoc3    | 1.31 | 4.55E-02 | DOWN | 1.62 | 1.45E-02 | DOWN |
| NM_001007682   | Thtpa    | 1.38 | 5.37E-03 | DOWN | 1.46 | 1.92E-02 | DOWN |
| NM_001012108   | Thumpd2  | 1.91 | 1.19E-02 | DOWN | 1.59 | 4.26E-02 | DOWN |
| NM_001108890   | Ticam2   | 1.41 | 2.05E-03 | DOWN | 1.45 | 2.45E-02 | DOWN |
| NM_032618      | Timm22   | 1.33 | 1.34E-02 | DOWN | 1.67 | 8.21E-03 | DOWN |
| NM_019352      | Timm23   | 1.32 | 3.92E-02 | DOWN | 1.65 | 9.52E-03 | DOWN |
| NM_017267      | Timm44   | 1.31 | 1.17E-02 | DOWN | 1.54 | 2.80E-02 | DOWN |
| NM_001006962   | Tinf2    | 1.45 | 3.15E-02 | DOWN | 2.50 | 2.71E-04 | DOWN |
| NM_001146035   | Tlr10    | 1.18 | 4.40E-02 | DOWN | 1.18 | 1.49E-02 | DOWN |
| NM_001017444   | Tm2d2    | 1.37 | 1.38E-02 | DOWN | 1.92 | 1.54E-03 | DOWN |
| NM_001127654   | Tm6sf2   | 1.42 | 2.87E-02 | DOWN | 2.24 | 2.31E-02 | DOWN |
| NM_001169102   | Tma16    | 1.32 | 2.78E-02 | DOWN | 1.47 | 3.97E-02 | DOWN |
| NM_001126048   | Tma7     | 1.43 | 2.99E-02 | DOWN | 1.82 | 5.94E-03 | DOWN |
| NM_001009631   | Tmco1    | 1.30 | 2.18E-02 | DOWN | 2.26 | 7.49E-03 | DOWN |
| NM_053467      | Tmed10   | 1.26 | 2.80E-02 | DOWN | 1.52 | 4.49E-02 | DOWN |



|              |          |      |          |      |      |          |      |
|--------------|----------|------|----------|------|------|----------|------|
| NM_031722    | Tmed2    | 1.23 | 1.96E-02 | DOWN | 1.61 | 1.43E-02 | DOWN |
| NM_001009703 | Tmed9    | 1.33 | 2.66E-02 | DOWN | 1.61 | 4.00E-02 | DOWN |
| NM_001078647 | Tmem134  | 1.32 | 1.32E-02 | DOWN | 1.39 | 3.30E-02 | DOWN |
| NM_001010961 | Tmem17   | 1.33 | 1.57E-02 | DOWN | 1.52 | 1.80E-02 | DOWN |
| NM_001109572 | Tmem179b | 1.36 | 2.44E-02 | DOWN | 1.92 | 9.08E-03 | DOWN |
| NM_199098    | Tmem19   | 1.34 | 8.06E-03 | DOWN | 2.20 | 1.30E-02 | DOWN |
| NM_001107819 | Tmem203  | 1.30 | 4.34E-02 | DOWN | 1.71 | 9.48E-03 | DOWN |
| NM_001106179 | Tmem208  | 1.31 | 3.41E-02 | DOWN | 2.05 | 1.62E-02 | DOWN |
| NM_001113780 | Tmem222  | 1.51 | 2.53E-03 | DOWN | 1.49 | 2.36E-02 | DOWN |
| NM_001108220 | Tmem237  | 1.50 | 8.02E-04 | DOWN | 1.26 | 4.04E-02 | DOWN |
| NM_001109528 | Tmem25   | 1.87 | 1.09E-02 | DOWN | 1.80 | 1.91E-02 | DOWN |
| NM_001170549 | Tmem256  | 1.40 | 4.20E-02 | DOWN | 1.78 | 6.53E-03 | DOWN |
| NM_001014192 | Tmem39b  | 1.39 | 4.68E-03 | DOWN | 1.62 | 1.49E-02 | DOWN |
| NM_001012358 | Tmem41b  | 1.23 | 4.29E-02 | DOWN | 1.84 | 8.44E-03 | DOWN |
| NM_001127525 | Tmem50a  | 1.27 | 4.73E-02 | DOWN | 1.82 | 9.40E-03 | DOWN |
| NM_001109273 | Tmem51   | 1.66 | 1.46E-02 | DOWN | 1.82 | 1.52E-02 | DOWN |
| NM_001191610 | Tmem60   | 1.46 | 1.78E-03 | DOWN | 1.96 | 9.16E-04 | DOWN |
| NM_001109258 | Tmem70   | 1.47 | 1.15E-03 | DOWN | 1.64 | 3.56E-03 | DOWN |
| NM_001017490 | Tmem81   | 1.25 | 3.66E-02 | DOWN | 1.39 | 2.00E-02 | DOWN |
| NM_001109604 | Tmem86b  | 1.33 | 4.19E-02 | DOWN | 2.73 | 2.60E-02 | DOWN |
| NM_001109299 | Tmie     | 1.39 | 4.69E-03 | DOWN | 1.44 | 2.62E-02 | DOWN |
| NM_012887    | Tmpo     | 1.25 | 3.06E-02 | DOWN | 1.57 | 1.78E-02 | DOWN |
| NM_001135858 | Tmtc3    | 1.19 | 3.09E-02 | DOWN | 1.81 | 2.12E-04 | DOWN |
| NM_198781    | Tmub1    | 1.94 | 2.77E-02 | DOWN | 2.63 | 2.55E-02 | DOWN |
| NM_001031651 | Tmub2    | 1.38 | 8.58E-03 | DOWN | 1.68 | 2.43E-02 | DOWN |
| NM_001137633 | Tnfaip2  | 2.99 | 4.11E-03 | DOWN | 2.14 | 4.44E-02 | DOWN |
| NM_001024349 | Tnfrsf18 | 1.11 | 8.32E-03 | DOWN | 1.19 | 1.87E-04 | DOWN |
| NM_133317    | Tob1     | 1.25 | 1.07E-02 | DOWN | 1.67 | 1.81E-02 | DOWN |
| NM_001002798 | Top1mt   | 1.43 | 3.20E-03 | DOWN | 1.78 | 1.41E-02 | DOWN |
| NM_001100858 | Top2b    | 1.26 | 1.86E-02 | DOWN | 1.68 | 6.36E-03 | DOWN |
| NM_139332    | Tpcn1    | 1.40 | 4.84E-03 | DOWN | 1.71 | 1.19E-02 | DOWN |
| NM_001106421 | Tpd52    | 1.30 | 1.78E-02 | DOWN | 1.42 | 4.44E-02 | DOWN |
| NM_001109621 | Tpgs1    | 1.35 | 1.99E-02 | DOWN | 1.78 | 2.00E-02 | DOWN |
| NM_001014147 | Tpgs2    | 1.31 | 2.20E-02 | DOWN | 1.88 | 4.29E-04 | DOWN |
| NM_001134994 | Tpk1     | 1.31 | 1.27E-02 | DOWN | 1.76 | 2.50E-02 | DOWN |
| NM_053534    | Tpra1    | 1.44 | 5.94E-03 | DOWN | 1.73 | 1.67E-02 | DOWN |
| NM_001024309 | Tprn     | 1.77 | 2.39E-03 | DOWN | 1.78 | 1.84E-02 | DOWN |
| NM_001012204 | Traf3ip1 | 1.28 | 1.94E-02 | DOWN | 1.56 | 2.28E-05 | DOWN |
| NM_001044248 | Traf3ip2 | 1.35 | 1.51E-02 | DOWN | 1.87 | 2.33E-03 | DOWN |
| NM_001039001 | Trap1    | 1.33 | 1.53E-02 | DOWN | 1.66 | 2.62E-02 | DOWN |
| NM_001039378 | Trappc1  | 1.43 | 6.01E-03 | DOWN | 1.75 | 1.79E-02 | DOWN |

|              |          |      |          |      |      |          |      |
|--------------|----------|------|----------|------|------|----------|------|
| NM_001169115 | Trappc11 | 1.25 | 3.58E-02 | DOWN | 1.61 | 1.13E-02 | DOWN |
| NM_001106193 | Trappc2l | 1.39 | 3.07E-02 | DOWN | 1.40 | 2.22E-02 | DOWN |
| NM_001008376 | Trappc3  | 1.29 | 4.06E-02 | DOWN | 1.57 | 1.36E-02 | DOWN |
| NM_001108276 | Trim11   | 1.32 | 4.67E-02 | DOWN | 1.76 | 1.13E-02 | DOWN |
| NM_001108552 | Trim2    | 1.52 | 2.50E-02 | DOWN | 2.71 | 6.50E-04 | DOWN |
| NM_001100637 | Trim23   | 1.28 | 2.41E-02 | DOWN | 1.39 | 4.70E-02 | DOWN |
| NM_001011665 | Trim26   | 1.36 | 2.91E-03 | DOWN | 1.98 | 1.26E-02 | DOWN |
| NM_001276491 | Trim34   | 1.27 | 4.12E-02 | DOWN | 1.85 | 3.01E-02 | DOWN |
| NM_001142944 | Trim43a  | 1.28 | 4.64E-02 | UP   | 1.20 | 4.98E-02 | DOWN |
| NM_001014023 | Trim5    | 1.46 | 7.86E-04 | DOWN | 1.97 | 6.97E-03 | DOWN |
| NM_001130061 | Trmt44   | 1.44 | 3.59E-02 | DOWN | 2.23 | 2.22E-03 | DOWN |
| NM_001136229 | Trpm4    | 1.45 | 2.94E-02 | DOWN | 2.38 | 1.20E-03 | UP   |
| NM_053705    | Trpm7    | 1.34 | 2.39E-02 | DOWN | 1.97 | 5.48E-03 | DOWN |
| NM_017207    | Trpv2    | 1.09 | 1.95E-02 | DOWN | 1.47 | 1.89E-02 | UP   |
| NM_053686    | Trpv6    | 1.27 | 1.09E-02 | DOWN | 1.54 | 5.32E-05 | DOWN |
| NM_001105907 | Trrap    | 1.36 | 9.54E-03 | DOWN | 1.45 | 1.33E-02 | DOWN |
| NM_001009965 | Tsku     | 2.24 | 1.92E-02 | UP   | 3.12 | 1.34E-02 | DOWN |
| NM_001107750 | Tspan18  | 1.38 | 4.90E-02 | DOWN | 1.78 | 8.04E-04 | DOWN |
| NM_001008378 | Tspan31  | 1.42 | 2.27E-02 | DOWN | 2.83 | 2.56E-03 | DOWN |
| NM_001013070 | Tspan4   | 1.51 | 4.77E-02 | UP   | 1.87 | 4.05E-02 | DOWN |
| NM_001191618 | Tspyl2   | 1.49 | 4.04E-03 | DOWN | 1.35 | 4.95E-02 | DOWN |
| NM_001115027 | Tsr2     | 1.33 | 3.56E-02 | DOWN | 1.48 | 2.28E-02 | DOWN |
| NM_001012192 | Tssc1    | 1.41 | 1.24E-02 | DOWN | 1.82 | 4.70E-03 | DOWN |
| NM_001013194 | Tssc4    | 1.39 | 2.43E-02 | DOWN | 1.55 | 3.31E-02 | DOWN |
| NM_012808    | Tst      | 1.33 | 1.63E-02 | DOWN | 2.29 | 3.12E-02 | DOWN |
| NM_001107766 | Ttbk2    | 1.23 | 3.94E-02 | DOWN | 1.22 | 4.11E-02 | DOWN |
| NM_001025681 | Ttc23    | 1.55 | 1.29E-02 | DOWN | 1.77 | 2.61E-02 | DOWN |
| NM_001106706 | Ttc27    | 1.42 | 7.04E-03 | DOWN | 1.60 | 1.17E-02 | DOWN |
| NM_001127607 | Ttc30b   | 1.42 | 7.65E-03 | DOWN | 1.56 | 1.22E-02 | DOWN |
| NM_001005546 | Ttc36    | 1.59 | 3.35E-02 | DOWN | 2.75 | 4.04E-02 | DOWN |
| NM_001007693 | Ttc9c    | 1.26 | 4.09E-02 | DOWN | 1.43 | 3.15E-02 | DOWN |
| NM_001106295 | Tufm     | 1.45 | 2.73E-03 | DOWN | 1.61 | 6.83E-03 | DOWN |
| NM_001109297 | Tusc2    | 1.23 | 4.06E-02 | DOWN | 1.62 | 7.42E-03 | DOWN |
| NM_053331    | Txn2     | 1.32 | 2.95E-02 | DOWN | 1.71 | 1.05E-02 | DOWN |
| NM_001024998 | Txndc15  | 1.22 | 4.40E-02 | DOWN | 1.67 | 1.57E-02 | DOWN |
| NM_172032    | Txndc9   | 1.26 | 4.97E-02 | DOWN | 1.75 | 7.18E-03 | DOWN |
| NM_001257347 | Tyk2     | 1.43 | 1.69E-02 | DOWN | 1.88 | 1.56E-02 | DOWN |
| NM_017092    | Tyro3    | 1.55 | 3.58E-03 | DOWN | 1.35 | 3.14E-02 | DOWN |
| NM_001107137 | Tyw1     | 1.50 | 5.55E-03 | DOWN | 1.73 | 3.35E-02 | DOWN |
| NM_138895    | Ubb      | 1.32 | 1.44E-02 | DOWN | 1.72 | 1.07E-02 | DOWN |
| NM_001013933 | Ube2a    | 1.39 | 4.38E-02 | DOWN | 1.74 | 7.57E-03 | DOWN |

|              |         |      |          |      |      |          |      |
|--------------|---------|------|----------|------|------|----------|------|
| NM_001108371 | Ube2e2  | 1.38 | 2.53E-02 | DOWN | 1.59 | 2.63E-02 | DOWN |
| NM_001047857 | Ube2e3  | 1.42 | 3.80E-03 | DOWN | 1.57 | 7.54E-03 | DOWN |
| NM_001108847 | Ube2l3  | 1.30 | 2.06E-02 | DOWN | 1.68 | 4.94E-03 | DOWN |
| NM_053928    | Ube2n   | 1.30 | 3.92E-02 | DOWN | 1.56 | 1.03E-02 | DOWN |
| NM_001110345 | Ube2v1  | 1.37 | 2.06E-02 | DOWN | 1.49 | 4.71E-02 | DOWN |
| NM_001034829 | Ubxn1   | 1.37 | 4.70E-02 | DOWN | 1.61 | 1.33E-02 | DOWN |
| NM_001107905 | Ubxn2b  | 1.32 | 3.09E-02 | DOWN | 1.46 | 4.34E-02 | DOWN |
| NM_001012025 | Ubxn4   | 1.37 | 4.30E-02 | DOWN | 1.68 | 3.07E-02 | DOWN |
| NM_001106086 | Ubxn8   | 1.27 | 1.44E-02 | DOWN | 1.90 | 3.84E-03 | DOWN |
| NM_001012149 | Uchl5   | 1.39 | 4.49E-02 | DOWN | 1.64 | 5.53E-03 | DOWN |
| NM_001003709 | Ufc1    | 1.31 | 3.64E-02 | DOWN | 1.85 | 4.30E-03 | DOWN |
| NM_001135869 | Ugt2a3  | 2.42 | 6.55E-03 | DOWN | 4.29 | 1.48E-02 | DOWN |
| NM_173323    | Ugt2b7  | 1.87 | 2.35E-02 | DOWN | 1.76 | 1.58E-02 | DOWN |
| NM_017293    | Uhmkl   | 1.52 | 1.41E-02 | DOWN | 1.69 | 1.73E-03 | DOWN |
| NM_001013884 | Uimcl   | 1.26 | 3.88E-02 | DOWN | 1.41 | 3.40E-02 | DOWN |
| NM_017188    | Unc119  | 1.47 | 9.03E-03 | DOWN | 1.62 | 1.34E-02 | DOWN |
| NM_199407    | Unc5c   | 1.35 | 3.10E-02 | DOWN | 1.35 | 1.81E-02 | DOWN |
| NM_001107319 | Unc5d   | 1.21 | 3.63E-02 | DOWN | 1.27 | 2.01E-02 | DOWN |
| NM_031777    | Usf1    | 1.29 | 3.78E-02 | DOWN | 1.65 | 1.27E-02 | DOWN |
| NM_031139    | Usf2    | 1.31 | 1.00E-02 | DOWN | 1.39 | 4.74E-02 | DOWN |
| NM_001271206 | Usp24   | 1.25 | 3.73E-02 | DOWN | 1.45 | 3.81E-02 | DOWN |
| NM_001136470 | Usp49   | 1.80 | 1.16E-03 | DOWN | 1.97 | 3.72E-03 | DOWN |
| NM_001135923 | Usp9x   | 1.29 | 3.11E-02 | DOWN | 1.55 | 1.11E-02 | DOWN |
| NM_134380    | Ust5r   | 1.57 | 2.23E-02 | DOWN | 3.13 | 1.63E-02 | DOWN |
| NM_001134558 | Uvssa   | 1.33 | 2.94E-02 | DOWN | 1.42 | 1.44E-02 | DOWN |
| NM_213563    | Vars2   | 1.35 | 6.48E-03 | DOWN | 1.55 | 1.16E-02 | DOWN |
| NM_053864    | Vcp     | 1.41 | 1.44E-02 | DOWN | 1.64 | 1.26E-02 | DOWN |
| NM_001099503 | Vom2r52 | 1.51 | 1.69E-02 | DOWN | 1.89 | 5.74E-03 | DOWN |
| NM_001173451 | Vps25   | 1.34 | 3.75E-02 | DOWN | 1.84 | 1.07E-02 | DOWN |
| NM_001106809 | Vps26b  | 1.45 | 1.89E-02 | DOWN | 1.53 | 4.12E-02 | DOWN |
| NM_001130492 | Vps28   | 1.33 | 1.79E-02 | DOWN | 1.39 | 4.29E-02 | DOWN |
| NM_022961    | Vps33a  | 1.29 | 2.33E-02 | DOWN | 1.58 | 8.19E-03 | DOWN |
| NM_001106092 | Vps36   | 1.36 | 1.41E-02 | DOWN | 1.53 | 1.79E-02 | DOWN |
| NM_001105928 | Vps37b  | 1.85 | 6.85E-03 | UP   | 1.60 | 4.52E-02 | DOWN |
| NM_173147    | Vps54   | 1.30 | 2.78E-02 | DOWN | 1.71 | 5.54E-03 | DOWN |
| NM_001106600 | Wbp1    | 1.44 | 1.57E-02 | DOWN | 1.44 | 4.39E-02 | DOWN |
| NM_001108332 | Wbscr16 | 1.36 | 1.49E-02 | DOWN | 1.64 | 4.07E-03 | DOWN |
| NM_001107269 | Wdfy2   | 1.26 | 8.99E-03 | DOWN | 2.04 | 2.27E-03 | DOWN |
| NM_001107255 | Wdhd1   | 1.20 | 7.49E-03 | DOWN | 1.53 | 2.09E-02 | DOWN |
| NM_001191084 | Wdr24   | 1.49 | 8.74E-03 | DOWN | 1.50 | 1.86E-02 | DOWN |
| NM_001006988 | Wdr6    | 1.81 | 1.02E-02 | DOWN | 1.91 | 2.05E-02 | DOWN |

|              |         |      |          |      |      |          |      |
|--------------|---------|------|----------|------|------|----------|------|
| NM_001107525 | Wdr73   | 1.36 | 3.67E-02 | DOWN | 1.45 | 4.70E-02 | DOWN |
| NM_001105947 | Wdr83os | 1.32 | 4.67E-02 | DOWN | 1.52 | 3.48E-02 | DOWN |
| NM_001014078 | Wdr89   | 1.46 | 9.72E-03 | DOWN | 1.70 | 5.14E-03 | DOWN |
| NM_001107908 | Wdte1   | 1.44 | 5.86E-03 | DOWN | 1.68 | 1.16E-02 | DOWN |
| NM_001129776 | Wfikkn1 | 1.30 | 1.49E-02 | DOWN | 1.46 | 5.01E-03 | DOWN |
| NM_001014262 | Wrap73  | 1.39 | 4.78E-03 | DOWN | 1.63 | 4.81E-03 | DOWN |
| NM_001106184 | Wwp2    | 1.44 | 4.43E-03 | DOWN | 1.45 | 4.14E-02 | DOWN |
| NM_001012099 | Xkr8    | 1.40 | 3.77E-02 | DOWN | 1.62 | 3.17E-02 | DOWN |
| NM_001107874 | Xpc     | 1.29 | 2.38E-02 | DOWN | 1.59 | 1.52E-02 | DOWN |
| NM_131913    | Xpnpep1 | 1.28 | 4.78E-02 | DOWN | 1.63 | 1.31E-02 | DOWN |
| NM_001011935 | Xpo6    | 1.29 | 2.75E-02 | DOWN | 1.52 | 1.55E-02 | DOWN |
| NM_001108386 | Xpo7    | 1.27 | 4.91E-02 | DOWN | 1.53 | 1.98E-02 | DOWN |
| NM_177419    | Xrcc5   | 1.47 | 2.99E-03 | DOWN | 1.31 | 1.64E-02 | DOWN |
| NM_022296    | Xylt2   | 1.66 | 1.81E-03 | DOWN | 1.95 | 1.64E-02 | DOWN |
| NM_001108529 | Ybey    | 1.26 | 1.98E-02 | DOWN | 1.63 | 1.18E-02 | DOWN |
| NM_001109057 | Yeats2  | 1.38 | 2.28E-02 | DOWN | 1.63 | 1.36E-02 | DOWN |
| NM_001127527 | Yeats4  | 1.55 | 9.37E-03 | DOWN | 1.65 | 1.71E-02 | DOWN |
| NM_172017    | Yif1a   | 1.48 | 9.54E-03 | DOWN | 1.83 | 1.17E-02 | DOWN |
| NM_001014208 | Yipf2   | 1.49 | 1.03E-02 | DOWN | 1.60 | 3.91E-02 | DOWN |
| NM_001007801 | Yipf3   | 1.31 | 2.25E-02 | DOWN | 1.62 | 2.01E-02 | DOWN |
| NM_001009712 | Yipf4   | 1.22 | 1.22E-02 | DOWN | 1.79 | 3.38E-03 | DOWN |
| NM_001106129 | Zadh2   | 1.43 | 9.30E-03 | DOWN | 1.88 | 1.65E-02 | DOWN |
| NM_001009172 | Zbtb22  | 1.43 | 1.90E-02 | DOWN | 1.50 | 1.64E-02 | DOWN |
| NM_001106657 | Zbtb5   | 1.41 | 9.46E-03 | DOWN | 1.48 | 3.76E-02 | DOWN |
| NM_213564    | Zbtb9   | 1.34 | 1.43E-02 | DOWN | 1.45 | 1.29E-02 | DOWN |
| NM_001108146 | Zc3h12c | 1.21 | 1.81E-02 | DOWN | 1.28 | 5.40E-03 | DOWN |
| NM_001126374 | Zc4h2   | 1.41 | 1.59E-02 | DOWN | 1.73 | 5.23E-04 | DOWN |
| NM_001108360 | Zcchc4  | 1.48 | 2.83E-03 | DOWN | 1.53 | 2.29E-02 | DOWN |
| NM_001013239 | Zdhhc12 | 1.31 | 2.52E-02 | DOWN | 1.94 | 6.00E-03 | DOWN |
| NM_001013123 | Zdhhc4  | 1.35 | 3.46E-02 | DOWN | 1.82 | 4.91E-03 | DOWN |
| NM_001100707 | Zer1    | 1.43 | 1.06E-03 | DOWN | 1.51 | 1.54E-02 | DOWN |
| NM_173332    | Zfand4  | 1.31 | 2.22E-02 | DOWN | 1.50 | 2.55E-02 | DOWN |
| NM_001135018 | Zfp266  | 1.21 | 2.27E-02 | DOWN | 1.47 | 1.82E-02 | DOWN |
| NM_001107736 | Zfp385b | 1.54 | 3.93E-02 | DOWN | 2.53 | 5.16E-03 | DOWN |
| NM_019620    | Zfp386  | 1.41 | 1.39E-02 | DOWN | 2.07 | 2.13E-03 | DOWN |
| NM_001079943 | Zfp426  | 1.62 | 7.39E-04 | DOWN | 1.37 | 9.05E-03 | DOWN |
| NM_001169143 | Zfp444  | 1.63 | 3.14E-04 | DOWN | 1.68 | 3.53E-03 | DOWN |
| NM_001191802 | Zfp445  | 1.28 | 4.25E-02 | DOWN | 1.63 | 1.53E-02 | DOWN |
| NM_001107809 | Zfp512b | 1.40 | 6.99E-03 | DOWN | 1.99 | 3.11E-04 | DOWN |
| NM_001126272 | Zfp692  | 1.33 | 3.86E-02 | DOWN | 1.51 | 3.89E-02 | DOWN |
| NM_001108063 | Zfp763  | 1.81 | 2.01E-04 | DOWN | 1.42 | 8.63E-03 | DOWN |

|              |         |      |          |      |      |          |      |
|--------------|---------|------|----------|------|------|----------|------|
| NM_001107472 | Zfp772  | 1.30 | 2.67E-02 | DOWN | 1.53 | 1.09E-02 | DOWN |
| NM_001134544 | Zfp865  | 1.40 | 1.78E-02 | DOWN | 1.69 | 2.95E-03 | DOWN |
| NM_001134600 | Zfp879  | 1.35 | 2.64E-02 | DOWN | 1.45 | 4.34E-02 | DOWN |
| NM_001142758 | Zfp958  | 1.47 | 1.35E-02 | DOWN | 2.05 | 5.52E-03 | DOWN |
| NM_001286936 | Zfp11   | 1.42 | 1.45E-02 | DOWN | 1.45 | 4.75E-02 | DOWN |
| NM_001135582 | Zmat2   | 1.48 | 6.81E-03 | DOWN | 1.76 | 9.42E-03 | DOWN |
| NM_001107983 | Zmym1   | 1.41 | 3.75E-02 | DOWN | 1.62 | 1.35E-02 | DOWN |
| NM_001040155 | Zmym3   | 1.43 | 1.18E-02 | DOWN | 1.61 | 7.08E-03 | DOWN |
| NM_001004284 | Zmynd10 | 1.39 | 4.15E-02 | DOWN | 1.66 | 2.73E-02 | DOWN |
| NM_001271350 | Znhit1  | 1.47 | 1.63E-02 | DOWN | 1.54 | 2.91E-02 | DOWN |
| NM_001108628 | Znrf2   | 1.32 | 2.29E-02 | DOWN | 2.01 | 4.07E-02 | DOWN |
| NM_001012021 | Zscan21 | 1.30 | 2.87E-02 | DOWN | 1.56 | 4.37E-03 | DOWN |
| NM_001107163 | Zswim4  | 1.43 | 1.06E-02 | DOWN | 1.47 | 3.20E-02 | DOWN |

**Table S2.** Male DEG in common from the comparisons MO-110PND vs C-110PND and C-650PND vs C-110PND in males. Log2Fold change regulation and their statistical significance are shown by P-value.

|              |         | MO110 vs C110   |                  |           | 650 vs c110     |                  |           |
|--------------|---------|-----------------|------------------|-----------|-----------------|------------------|-----------|
| Gene ID      | Gene    | Fold Regulation | P-value (t-test) | Direction | Fold Regulation | P-value (t-test) | Direction |
| NM_001111056 | Adarb1  | 1.9             | 2.63E-02         | UP        | 1.64            | 1.93E-02         | UP        |
| NM_001107322 | Ank1    | 1.1             | 2.04E-02         | DOWN      | 1.11            | 1.13E-02         | DOWN      |
| NM_031780    | Apba2   | 2.7             | 9.08E-04         | UP        | 1.96            | 1.96E-02         | UP        |
| NM_001077201 | Caln1   | 1.1             | 4.68E-03         | DOWN      | 1.85            | 8.72E-04         | UP        |
| NM_053874    | Cap2    | 1.1             | 2.70E-02         | DOWN      | 1.40            | 2.50E-02         | UP        |
| NM_001110808 | Capn12  | 1.4             | 4.82E-02         | UP        | 1.43            | 1.23E-02         | UP        |
| NM_012552    | Cela1   | 2.9             | 3.14E-03         | DOWN      | 2.48            | 1.77E-03         | DOWN      |
| NM_001109353 | Clec12b | 1.2             | 5.22E-03         | UP        | 1.19            | 2.38E-02         | UP        |
| NR_037674    | Cox6a2  | 1.1             | 3.62E-02         | UP        | 1.05            | 4.95E-02         | UP        |
| NM_012536    | Ctrb1   | 1.1             | 4.34E-02         | DOWN      | 1.13            | 2.66E-02         | DOWN      |
| NM_001100908 | Fam129c | 1.9             | 2.81E-02         | UP        | 2.00            | 1.91E-02         | UP        |
| NM_001005888 | Galc    | 1.4             | 2.98E-02         | UP        | 1.93            | 1.38E-02         | UP        |
| NM_001145842 | Grn     | 1.5             | 4.34E-02         | UP        | 1.63            | 2.08E-02         | UP        |
| NM_001005900 | Hcst    | 1.3             | 2.18E-02         | UP        | 1.53            | 2.15E-02         | UP        |
| NM_013122    | Igfbp2  | 2.7             | 3.66E-02         | DOWN      | 2.84            | 9.03E-03         | UP        |
| NM_181634    | Lppr3   | 1.3             | 3.28E-02         | DOWN      | 5.71            | 1.33E-03         | UP        |
| NM_001009497 | Ly49si1 | 1.1             | 2.46E-02         | UP        | 1.24            | 1.77E-02         | UP        |
| NM_001106338 | Ms4a7   | 1.2             | 4.88E-02         | UP        | 1.36            | 7.18E-03         | UP        |

|              |            |     |          |      |      |          |      |
|--------------|------------|-----|----------|------|------|----------|------|
| NM_173096    | Mx1        | 1.5 | 4.56E-02 | UP   | 1.17 | 2.41E-02 | UP   |
| NM_001270867 | Nnat       | 1.0 | 3.13E-02 | UP   | 1.03 | 3.84E-02 | UP   |
| NM_001271129 | Nrg1       | 1.2 | 1.55E-02 | DOWN | 1.40 | 4.57E-02 | UP   |
| NM_024128    | Nsg1       | 1.2 | 4.21E-02 | DOWN | 1.81 | 7.48E-03 | UP   |
| NM_001033959 | Obp3       | 1.6 | 4.22E-03 | DOWN | 1.56 | 4.18E-03 | DOWN |
| NM_001106024 | Pde6b      | 1.1 | 2.06E-02 | UP   | 1.10 | 3.32E-02 | UP   |
| NM_001108522 | Pde6c      | 1.5 | 4.50E-04 | UP   | 1.73 | 1.86E-03 | UP   |
| NM_001145366 | Pparg      | 1.3 | 1.03E-02 | UP   | 1.39 | 4.18E-02 | UP   |
| NM_198773    | Ppm1e      | 1.1 | 2.16E-02 | DOWN | 1.09 | 2.99E-10 | DOWN |
| NM_001109328 | Rab7b      | 1.6 | 2.80E-02 | UP   | 1.57 | 3.32E-02 | UP   |
| NM_053721    | Rasgrf2    | 1.2 | 2.30E-02 | UP   | 1.17 | 3.27E-03 | UP   |
| NR_027235    | RGD1559747 | 1.3 | 4.09E-02 | UP   | 1.26 | 1.01E-02 | UP   |
| NM_001127567 | RGD1561648 | 1.2 | 3.59E-02 | UP   | 1.40 | 2.45E-02 | UP   |
| NM_001172116 | Samd3      | 1.3 | 2.21E-02 | UP   | 2.28 | 7.32E-03 | UP   |
| NM_001108964 | Spo11      | 1.1 | 3.85E-02 | UP   | 1.06 | 1.04E-02 | UP   |
| NM_001271235 | Tnfrsf11a  | 1.7 | 1.66E-02 | UP   | 1.62 | 9.75E-03 | UP   |
| NM_001109112 | Tnfsf13b   | 1.2 | 4.64E-02 | UP   | 1.40 | 1.68E-03 | UP   |
| NM_001170559 | Vcan       | 1.2 | 1.57E-02 | UP   | 1.26 | 4.40E-02 | UP   |
| NM_001013863 | Ydjc       | 1.1 | 1.66E-02 | UP   | 1.21 | 6.61E-03 | UP   |

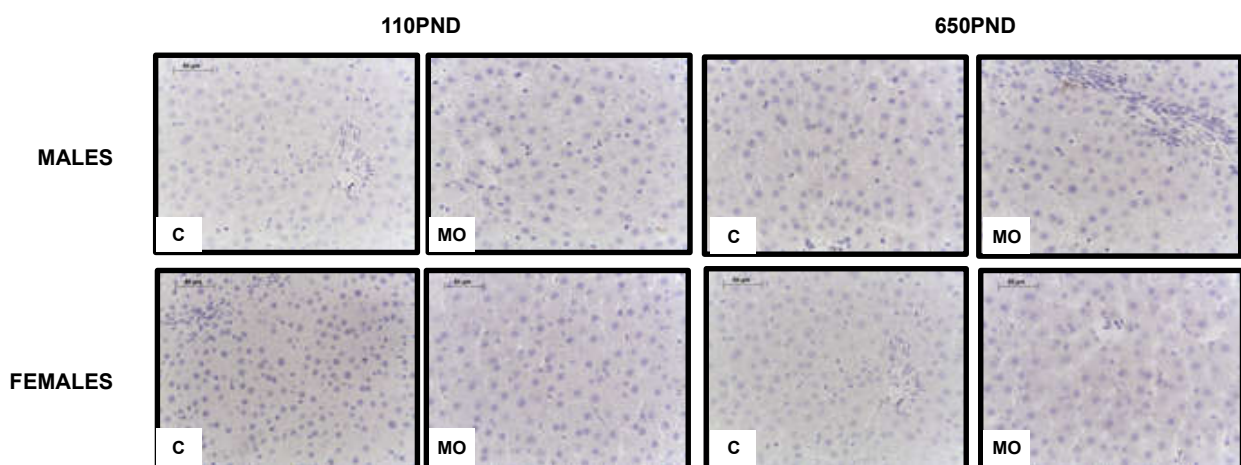

**Figure S1.** Representative IHC micrograph of negative controls (40x).
